# Supplementary material
Source: PubMed Central journal article supplement (PMC1856251)
Supplement: gut_2005.073262_2.pdf [file gut_2005.073262_2.pdf]

| <b>X3P ID</b>          | <b>UniGene ID</b> | <b>Gene Title</b>                                                                                    | <b>Gene Symbol</b> | <b>A</b> | <b>M</b> | <b>p-fdr</b> |
|------------------------|-------------------|------------------------------------------------------------------------------------------------------|--------------------|----------|----------|--------------|
| Hs.273321.1.A1_3p_a_at | Hs.273321         | olfactomedin 4                                                                                       | OLFM4              | 7.6      | 62.4     | 0.0047       |
| Hs.184572.0.S2_3p_at   | Hs.334562         | cell division cycle 2. G1 to S and G2 to M                                                           | CDC2               | 7.7      | 23.6     | 0.0023       |
| Hs.75319.0.S3_3p_at    | Hs.226390         | ribonucleotide reductase M2 polypeptide                                                              | RRM2               | 7.7      | 19.6     | 0.0047       |
| Hs.156346.0.S3_3p_at   | Hs.156346         | topoisomerase (DNA) II alpha 170kDa                                                                  | TOP2A              | 6.4      | 14.9     | 0.0011       |
| g6466452_3p_s_at       | Hs.79078          | MAD2 mitotic arrest deficient-like 1 (yeast)                                                         | MAD2L1             | 7.6      | 14.7     | 0.0052       |
| Hs.23960.2.S1_3p_a_at  | Hs.15740          | cyclin B1                                                                                            | CCNB1              | 5.8      | 14.2     | 0.0125       |
| g7705950_3p_at         | Hs.279905         | nucleolar and spindle associated protein 1                                                           | NUSAP1             | 7.8      | 14.1     | 0.0092       |
| g11038651_3p_x_at      | Hs.350966         | pituitary tumor-transforming 1                                                                       | PTTG1              | 9.1      | 13.9     | 0.0116       |
| g7661905_3p_s_at       | Hs.81892          | KIAA0101                                                                                             | KIAA0101           | 8.1      | 13.8     | 0.0037       |
| g12654170_3p_a_at      | Hs.434953         | high-mobility group box 2                                                                            | HMGB2              | 9.3      | 13.4     | 0.0062       |
| g13641303_3p_s_at      | Hs.435733         | cell division cycle associated 7                                                                     | CDCA7              | 7.5      | 12.0     | 0.0044       |
| g13699823_3p_at        | Hs.8878           | kinesin family member 11                                                                             | KIF11              | 5.4      | 11.3     | 0.0109       |
| g5031876_3p_at         | Hs.89497          | lamin B1                                                                                             | LMNB1              | 7.1      | 11.1     | 0.0112       |
| g5031876_3p_x_at       | Hs.89497          | lamin B1                                                                                             | LMNB1              | 7.7      | 11.0     | 0.0087       |
| Hs.156346.0.S1_3p_a_at | Hs.156346         | topoisomerase (DNA) II alpha 170kDa                                                                  | TOP2A              | 7.2      | 10.3     | 0.0047       |
| g13529292_3p_at        | Hs.164018         | leucine zipper protein FKSG14                                                                        | FKSG14             | 6.1      | 10.0     | 0.0053       |
| g10938017_3p_at        | Hs.194698         | cyclin B2                                                                                            | CCNB2              | 8.2      | 9.4      | 0.0037       |
| g12804874_3p_a_at      | Hs.226390         | ribonucleotide reductase M2 polypeptide                                                              | RRM2               | 7.7      | 9.2      | 0.0109       |
| g8922501_3p_at         | Hs.14559          | chromosome 10 open reading frame 3                                                                   | C10orf3            | 5.7      | 9.1      | 0.0090       |
| Hs.111334.2.S2_3p_at   | Hs.356835         | epithelial membrane protein 2                                                                        | EMP2               | 7.7      | 9.0      | 0.0014       |
| g13375855_3p_a_at      | Hs.38178          | MLF1 interacting protein                                                                             | MLF1IP             | 6.6      | 8.5      | 0.0108       |
| Hs.77448.2.S1_3p_at    | Hs.347524         | hypothetical protein MGC24665                                                                        | MGC24665           | 7.6      | 8.3      | 0.0190       |
| g5453538_3p_a_at       | Hs.444439         | phosphoribosylaminoimidazole carboxylase. phosphoribosylaminoimidazole succinocarboxamide synthetase | PAICS              | 7.7      | 7.9      | 0.0068       |
| g7661851_3p_at         | Hs.77695          | discs. large homolog 7 (Drosophila)                                                                  | DLG7               | 5.9      | 7.8      | 0.0191       |
| g11641252_3p_at        | Hs.528669         | chromosome condensation protein G                                                                    | HCAP-G             | 6.0      | 7.8      | 0.0078       |

|                        |           |                                                                             |               |      |     |        |
|------------------------|-----------|-----------------------------------------------------------------------------|---------------|------|-----|--------|
| Hs.154443.1.S1_3p_a_at | Hs.460184 | MCM4 minichromosome maintenance deficient 4 ( <i>S. cerevisiae</i> )        | MCM4          | 7.4  | 7.8 | 0.0209 |
| g8922180_3p_at         | Hs.104859 | hypothetical protein DKFZp762E1312                                          | DKFZp762E1312 | 6.8  | 7.7 | 0.0083 |
| g4507750_3p_at         | Hs.87491  | thymidylate synthetase                                                      | TYMS          | 8.1  | 7.2 | 0.0044 |
| g5729749_3p_at         | Hs.36708  | BUB1 budding uninhibited by benzimidazoles 1 homolog beta ( <i>yeast</i> )  | BUB1B         | 5.7  | 6.8 | 0.0157 |
| g4885496_3p_at         | Hs.407830 | v-myb myeloblastosis viral oncogene homolog ( <i>avian</i> )                | MYB           | 8.0  | 6.7 | 0.0118 |
| g4585861_3p_a_at       | Hs.1594   | centromere protein A. 17kDa                                                 | CENPA         | 6.0  | 6.5 | 0.0398 |
| Hs.23960.0.S1_3p_at    | Hs.15740  | cyclin B1                                                                   | CCNB1         | 5.2  | 6.4 | 0.0257 |
| Hs.127797.0.A2_3p_at   | Hs.127797 | Helicase. lymphoid-specific                                                 | HELLS         | 5.1  | 6.2 | 0.0349 |
| Hs.111334.2.S1_3p_at   | Hs.356835 | epithelial membrane protein 2                                               | EMP2          | 7.0  | 6.2 | 0.0056 |
| Hs.16520.0.S1_3p_a_at  | Hs.351623 | transcription factor RAM2                                                   | RAM2          | 7.4  | 6.1 | 0.0145 |
| g13506815_3p_at        | Hs.433278 | emopamil binding protein-like                                               | EBPL          | 8.3  | 6.0 | 0.0392 |
| g13375949_3p_at        | Hs.94292  | FLJ23311 protein                                                            | FLJ23311      | 6.1  | 5.9 | 0.0181 |
| g12804750_3p_at        | Hs.71827  | RRS1 ribosome biogenesis regulator homolog ( <i>S. cerevisiae</i> )         | RRS1          | 6.7  | 5.9 | 0.0206 |
| g6857828_3p_s_at       | Hs.42650  | ZW10 interactor                                                             | ZWINT         | 7.7  | 5.9 | 0.0138 |
| g5174456_3p_at         | Hs.414407 | kinetochore associated 2                                                    | KNTC2         | 6.1  | 5.8 | 0.0190 |
| g8096220_3p_at         | Hs.50813  | intelectin 1 (galactofuranose binding)                                      | ITLN1         | 10.0 | 5.8 | 0.0119 |
| Hs.23900.1.S1_3p_a_at  | Hs.23900  | Rac GTPase activating protein 1                                             | RACGAP1       | 6.6  | 5.8 | 0.0364 |
| g12667400_3p_at        | Hs.234545 | cell division cycle associated 1                                            | CDCA1         | 5.4  | 5.7 | 0.0142 |
| g13447750_3p_at        | Hs.249159 | adrenergic. alpha-2A-. receptor                                             | ADRA2A        | 7.0  | 5.7 | 0.0181 |
| Hs.256150.0.S1_3p_at   | Hs.335951 | Hypothetical protein AF301222                                               | NY-REN-41     | 6.3  | 5.7 | 0.0300 |
| g8923876_3p_at         | Hs.104741 | T-LAK cell-originated protein kinase                                        | TOPK          | 5.3  | 5.7 | 0.0392 |
| g4502858_3p_s_at       | Hs.83758  | CDC28 protein kinase regulatory subunit 2                                   | CKS2          | 7.9  | 5.5 | 0.0428 |
| g4506038_3p_a_at       | Hs.344037 | protein regulator of cytokinesis 1                                          | PRC1          | 7.9  | 5.5 | 0.0257 |
| g4506974_3p_at         | Hs.110736 | solute carrier family 12 (sodium/potassium/chloride transporters). member 2 | SLC12A2       | 7.0  | 5.4 | 0.0054 |
| Hs.127268.0.S1_3p_x_at | Hs.450020 | Similar to hypothetical protein FLJ38359                                    | ---           | 10.2 | 5.3 | 0.0178 |
| g5902145_3p_at         | Hs.93002  | ubiquitin-conjugating enzyme E2C                                            | UBE2C         | 7.5  | 5.3 | 0.0101 |
| g2735291_3p_a_at       | Hs.367676 | dUTP pyrophosphatase                                                        | DUT           | 7.9  | 5.3 | 0.0150 |

|                         |           |                                                                                                         |          |      |     |        |
|-------------------------|-----------|---------------------------------------------------------------------------------------------------------|----------|------|-----|--------|
| g12734643_3p_a_at       | Hs.84113  | cyclin-dependent kinase inhibitor 3 (CDK2-associated dual specificity phosphatase)                      | CDKN3    | 6.8  | 5.2 | 0.0182 |
| Hs.117950.0.S2_3p_a_at  | Hs.444439 | phosphoribosylaminoimidazole carboxylase.<br>phosphoribosylaminoimidazole succinocarboxamide synthetase | PAICS    | 7.6  | 5.2 | 0.0347 |
| Hs.78614.3.A1_3p_a_at   | Hs.413852 | complement component 1. q subcomponent binding protein                                                  | C1QBP    | 9.3  | 5.1 | 0.0411 |
| Hs2.145582.1.S1_3p_s_at | Hs.145582 | prominin 2                                                                                              | PROM2    | 6.7  | 5.0 | 0.0212 |
| g7661973_3p_at          | Hs.184339 | maternal embryonic leucine zipper kinase                                                                | MELK     | 7.2  | 4.9 | 0.0360 |
| Hs2.105097.2.S1_3p_s_at | Hs.164457 | thymidine kinase 1. soluble                                                                             | TK1      | 7.2  | 4.8 | 0.0134 |
| g9910265_3p_at          | Hs.307529 | kinesin-like 7                                                                                          | KNSL7    | 5.3  | 4.8 | 0.0182 |
| g4506128_3p_at          | Hs.104123 | phosphoribosyl pyrophosphate synthetase 2                                                               | PRPS2    | 8.2  | 4.8 | 0.0375 |
| g4758169_3p_a_at        | Hs.279611 | deleted in malignant brain tumors 1                                                                     | DMBT1    | 12.6 | 4.7 | 0.0450 |
| Hs.18349.1.S1_3p_at     | Hs.534827 | Similar to RIKEN cDNA 2700049P18 gene                                                                   | MGC57827 | 6.1  | 4.7 | 0.0153 |
| g4507718_3p_at          | ---       | ---                                                                                                     | ---      | 5.8  | 4.7 | 0.0449 |
| Hs.104696.0.S2_3p_at    | Hs.104696 | maba1                                                                                                   | KIAA1324 | 7.9  | 4.6 | 0.0212 |
| Hs.287440.0.S1_3p_at    | Hs.287440 | CDNA FLJ11692 fis. clone HEMBA1004983                                                                   | ---      | 5.3  | 4.6 | 0.0376 |
| Hs.80976.1.S1_3p_a_at   | Hs.80976  | antigen identified by monoclonal antibody Ki-67                                                         | MKI67    | 6.8  | 4.5 | 0.0216 |
| g12803002_3p_at         | Hs.115474 | replication factor C (activator 1) 3. 38kDa                                                             | RFC3     | 7.3  | 4.5 | 0.0182 |
| Hs.62180.0.S2_3p_a_at   | Hs.62180  | anillin. actin binding protein (scraps homolog. Drosophila)                                             | ANLN     | 6.0  | 4.5 | 0.0142 |
| Hs.144687.0.S1_3p_at    | Hs.416375 | E2F transcription factor 7                                                                              | E2F7     | 5.1  | 4.5 | 0.0117 |
| g7657047_3p_at          | Hs.313544 | nucleostemin                                                                                            | NS       | 8.7  | 4.4 | 0.0197 |
| g12653112_3p_a_at       | Hs.409065 | flap structure-specific endonuclease 1                                                                  | FEN1     | 8.9  | 4.3 | 0.0214 |
| g4504102_3p_at          | Hs.2704   | glutathione peroxidase 2 (gastrointestinal)                                                             | GPX2     | 9.0  | 4.3 | 0.0233 |
| g4507902_3p_at          | Hs.422662 | vaccinia related kinase 1                                                                               | VRK1     | 6.1  | 4.2 | 0.0197 |
| Hs.289721.3.S1_3p_a_at  | Hs.19340  | growth arrest-specific 5                                                                                | GAS5     | 7.0  | 4.2 | 0.0114 |
| Hs.76084.1.S1_3p_s_at   | Hs.76084  | lamin B2                                                                                                | LMNB2    | 6.5  | 4.2 | 0.0451 |
| g13570016_3p_at         | Hs.415749 | protein kinase. DNA-activated. catalytic polypeptide                                                    | PRKDC    | 7.1  | 4.2 | 0.0232 |

|                        |           |                                                                        |          |      |     |        |
|------------------------|-----------|------------------------------------------------------------------------|----------|------|-----|--------|
| g4504688_3p_s_at       | Hs.75432  | IMP (inosine monophosphate) dehydrogenase 2                            | IMPDH2   | 8.7  | 4.2 | 0.0106 |
| Hs.250746.2.S1_3p_a_at | Hs.297792 | putative NFkB activating protein 373                                   | FLJ23091 | 6.6  | 4.2 | 0.0138 |
| g7705575_3p_a_at       | Hs.436806 | RA-regulated nuclear matrix-associated protein                         | RAMP     | 6.0  | 4.1 | 0.0205 |
| g4506558_3p_a_at       | Hs.12013  | ATP-binding cassette. sub-family E (OABP). member 1                    | ABCE1    | 6.4  | 4.1 | 0.0388 |
| g8922941_3p_at         | Hs.281895 | acid acyltransferase-epsilon                                           | LPAAT-e  | 8.4  | 4.1 | 0.0225 |
| Hs.118064.2.S1_3p_a_at | Hs.510265 | nuclear ubiquitous casein kinase and cyclin-dependent kinase substrate | NUCKS    | 10.3 | 4.1 | 0.0019 |
| Hs.133260.0.S2_3p_a_at | Hs.445098 | DEP domain containing 1                                                | DEPDC1   | 5.1  | 4.1 | 0.0284 |
| g8922431_3p_a_at       | Hs.293257 | epithelial cell transforming sequence 2 oncogene                       | ECT2     | 6.8  | 4.0 | 0.0360 |
| g4758705_3p_s_at       | Hs.57101  | MCM2 minichromosome maintenance deficient 2. mitotin (S. cerevisiae)   | MCM2     | 7.9  | 3.9 | 0.0234 |
| g10800147_3p_at        | Hs.360033 | KIAA0186 gene product                                                  | KIAA0186 | 6.6  | 3.9 | 0.0086 |
| g181154_3p_s_at        | Hs.99853  | fibrillarin                                                            | FBL      | 9.1  | 3.9 | 0.0152 |
| g13537354_3p_s_at      | Hs.528353 | leucine-rich repeats and immunoglobulin-like domains 1                 | LRIG1    | 8.5  | 3.9 | 0.0305 |
| Hs.88523.0.S1_3p_at    | Hs.507467 | chromosome 13 open reading frame 3                                     | C13orf3  | 4.8  | 3.9 | 0.0277 |
| Hs.13421.0.S1_3p_at    | Hs.504378 | KIAA0056 protein                                                       | KIAA0056 | 6.0  | 3.9 | 0.0403 |
| g1277202_3p_a_at       | Hs.5337   | isocitrate dehydrogenase 2 (NADP+). mitochondrial                      | IDH2     | 9.9  | 3.9 | 0.0109 |
| g13570016_3p_x_at      | Hs.415749 | protein kinase. DNA-activated. catalytic polypeptide                   | PRKDC    | 7.3  | 3.8 | 0.0228 |
| g13543656_3p_s_at      | Hs.159557 | karyopherin alpha 2 (RAG cohort 1. importin alpha 1)                   | KPNA2    | 7.8  | 3.8 | 0.0304 |
| g8922484_3p_s_at       | Hs.121028 | asp (abnormal spindle)-like. microcephaly associated (Drosophila)      | ASPM     | 5.6  | 3.8 | 0.0118 |
| g5453793_3p_a_at       | Hs.376064 | nucleolar protein 5A (56kDa with KKE/D repeat)                         | NOL5A    | 8.9  | 3.8 | 0.0313 |
| g6224978_3p_a_at       | Hs.78853  | uracil-DNA glycosylase                                                 | UNG      | 8.9  | 3.7 | 0.0151 |
| g3560556_3p_at         | Hs.90073  | CSE1 chromosome segregation 1-like (yeast)                             | CSE1L    | 6.5  | 3.7 | 0.0138 |
| Hs.301478.0.S1_3p_at   | Hs.525566 | KIAA0500 protein                                                       | KIAA0500 | 8.3  | 3.7 | 0.0403 |
| g8980659_3p_at         | Hs.127797 | helicase. lymphoid-specific                                            | HELLS    | 5.4  | 3.7 | 0.0416 |
| g13376819_3p_at        | Hs.23723  | pseudouridylate synthase 1                                             | PUS1     | 7.5  | 3.6 | 0.0192 |

|                        |           |                                                                                                                 |           |     |     |        |
|------------------------|-----------|-----------------------------------------------------------------------------------------------------------------|-----------|-----|-----|--------|
| Hs.82502.0.S1_3p_at    | Hs.82502  | polymerase (DNA-directed). delta 3. accessory subunit                                                           | POLD3     | 8.7 | 3.6 | 0.0093 |
| Hs.193063.0.S2_3p_at   | Hs.132246 | Solute carrier family 38. member 1                                                                              | SLC38A1   | 9.1 | 3.6 | 0.0095 |
| g13376819_3p_x_at      | Hs.23723  | pseudouridylate synthase 1                                                                                      | PUS1      | 7.9 | 3.6 | 0.0235 |
| g8922408_3p_a_at       | Hs.435982 | hypothetical protein FLJ10407                                                                                   | FLJ10407  | 6.2 | 3.6 | 0.0382 |
| g8922641_3p_at         | Hs.24641  | cytoskeleton associated protein 2                                                                               | CKAP2     | 7.6 | 3.6 | 0.0446 |
| g4504368_3p_at         | Hs.47504  | exonuclease 1                                                                                                   | EXO1      | 5.7 | 3.6 | 0.0476 |
| g5803112_3p_a_at       | Hs.74368  | cytoskeleton-associated protein 4                                                                               | CKAP4     | 8.9 | 3.6 | 0.0206 |
| Hs.80976.1.S4_3p_a_at  | Hs.80976  | antigen identified by monoclonal antibody Ki-67                                                                 | MKI67     | 6.7 | 3.5 | 0.0232 |
| Hs.165909.0.A1_3p_at   | ---       | ---                                                                                                             | ---       | 4.8 | 3.5 | 0.0446 |
| Hs.274448.1.S1_3p_at   | Hs.406639 | hypothetical protein LOC146909                                                                                  | LOC146909 | 4.8 | 3.5 | 0.0382 |
| g8922864_3p_at         | Hs.38114  | BRIX                                                                                                            | BRIX      | 6.3 | 3.5 | 0.0228 |
| Hs.105478.0.S1_3p_at   | Hs.88139  | phosphoribosylformylglycinamide synthase (FGAR amidotransferase)                                                | PFAS      | 6.1 | 3.5 | 0.0206 |
| g5032012_3p_at         | Hs.153546 | kinesin family member 20A                                                                                       | KIF20A    | 7.0 | 3.5 | 0.0057 |
| g7661877_3p_at         | Hs.3104   | Kinesin family member 14                                                                                        | KIF14     | 5.2 | 3.5 | 0.0374 |
| Hs.103135.0.A1_3p_at   | ---       | ---                                                                                                             | ---       | 7.9 | 3.4 | 0.0182 |
| g6631094_3p_x_at       | Hs.179565 | MCM3 minichromosome maintenance deficient 3 (S. cerevisiae)                                                     | MCM3      | 8.2 | 3.4 | 0.0449 |
| g1917006_3p_at         | Hs.128453 | frizzled-related protein                                                                                        | FRZB      | 6.1 | 3.4 | 0.0332 |
| g8400737_3p_at         | Hs.408312 | tumor protein p53 (Li-Fraumeni syndrome)                                                                        | TP53      | 8.3 | 3.4 | 0.0238 |
| Hs.286192.0.S1_3p_at   | Hs.286192 | protein phosphatase 1. regulatory (inhibitor) subunit 1B (dopamine and cAMP regulated phosphoprotein. DARPP-32) | PPP1R1B   | 8.2 | 3.3 | 0.0035 |
| Hs.318584.0.S1_3p_at   | Hs.18919  | zinc and ring finger 3                                                                                          | ZNRF3     | 5.0 | 3.3 | 0.0332 |
| g5729983_3p_at         | Hs.241517 | polymerase (DNA directed). theta                                                                                | POLQ      | 5.4 | 3.3 | 0.0351 |
| Hs.104696.0.S1_3p_a_at | Hs.104696 | maba1                                                                                                           | KIAA1324  | 9.2 | 3.3 | 0.0170 |
| Hs.21331.0.S2_3p_at    | ---       | ---                                                                                                             | ---       | 8.3 | 3.3 | 0.0446 |
| g4503986_3p_at         | Hs.78619  | gamma-glutamyl hydrolase (conjugase. folypolygammaglutamyl hydrolase)                                           | GGH       | 5.3 | 3.3 | 0.0418 |
| Hs.293514.0.A1_3p_at   | Hs.479612 | hypothetical protein FLJ14001                                                                                   | FLJ14001  | 5.9 | 3.3 | 0.0138 |
| g13436073_3p_a_at      | Hs.286049 | phosphoserine aminotransferase 1                                                                                | PSAT1     | 6.9 | 3.2 | 0.0267 |
| g4758323_3p_a_at       | Hs.444082 | enhancer of zeste homolog 2 (Drosophila)                                                                        | EZH2      | 8.1 | 3.2 | 0.0182 |

|                        |           |                                                                                                      |            |      |     |        |
|------------------------|-----------|------------------------------------------------------------------------------------------------------|------------|------|-----|--------|
| g7657205_3p_a_at       | Hs.405465 | integrin beta 3 binding protein (beta3-<br>endonexin)                                                | ITGB3BP    | 7.9  | 3.2 | 0.0385 |
| Hs.288928.0.S1_3p_s_at | Hs.134885 | zinc finger protein 300                                                                              | ZNF300     | 5.1  | 3.2 | 0.0257 |
| Hs.93121.1.S1_3p_at    | Hs.93121  | G-protein signalling modulator 2<br>(AGS3-like. <i>C. elegans</i> )                                  | GPSP2      | 9.0  | 3.2 | 0.0349 |
| g9506436_3p_at         | Hs.49932  | chromosome 21 open reading frame<br>45                                                               | C21orf45   | 6.5  | 3.2 | 0.0327 |
| g12804598_3p_a_at      | Hs.500995 | small nuclear ribonucleoprotein D1<br>polypeptide 16kDa                                              | SNRPD1     | 9.8  | 3.2 | 0.0491 |
| Hs.133294.1.S1_3p_a_at | Hs.133294 | IQ motif containing GTPase<br>activating protein 3                                                   | IQGAP3     | 6.9  | 3.2 | 0.0058 |
| Hs.296585.0.S1_3p_s_at | Hs.376064 | nucleolar protein 5A (56kDa with<br>KKE/D repeat)                                                    | NOL5A      | 7.7  | 3.1 | 0.0162 |
| g7706484_3p_at         | Hs.183803 | TNF receptor-associated protein 1                                                                    | TRAP1      | 8.3  | 3.1 | 0.0319 |
| g6841461_3p_at         | Hs.119908 | nucleolar protein NOP5/NOP58                                                                         | NOP5/NOP58 | 10.1 | 3.1 | 0.0146 |
| Hs2.433010.1.S1_3p_at  | Hs.433010 | Transcribed locus. weakly similar to<br>XP_343448.1 similar to ORF4 [ <i>Rattus<br/>norvegicus</i> ] | ---        | 8.3  | 3.1 | 0.0106 |
| Hs.111749.1.S1_3p_a_at | Hs.111749 | PMS1 postmeiotic segregation<br>increased 1 ( <i>S. cerevisiae</i> )                                 | PMS1       | 7.0  | 3.1 | 0.0389 |
| Hs.62711.0.S1_3p_at    | ---       | ---                                                                                                  | ---        | 7.4  | 3.1 | 0.0023 |
| g4557796_3p_at         | Hs.118638 | non-metastatic cells 1. protein<br>(NM23A) expressed in                                              | NME1       | 7.4  | 3.0 | 0.0223 |
| Hs.110080.0.S1_3p_s_at | Hs.512260 | ovostatin                                                                                            | OVOS       | 7.8  | 3.0 | 0.0385 |
| g4557436_3p_s_at       | Hs.82906  | CDC20 cell division cycle 20 homolog<br>( <i>S. cerevisiae</i> )                                     | CDC20      | 7.2  | 3.0 | 0.0232 |
| g4505408_3p_s_at       | Hs.433416 | non-metastatic cells 2. protein<br>(NM23B) expressed in                                              | NME2       | 11.2 | 3.0 | 0.0343 |
| Hs.121536.0.S1_3p_at   | Hs.121536 | DUF729 domain containing 1                                                                           | DUFD1      | 5.7  | 3.0 | 0.0411 |
| Hs.12969.1.S1_3p_a_at  | Hs.186649 | hypothetical protein LOC54103                                                                        | LOC54103   | 6.6  | 3.0 | 0.0343 |
| Hs.17731.0.S1_3p_at    | Hs.17731  | hypothetical protein FLJ12892                                                                        | FLJ12892   | 9.9  | 3.0 | 0.0275 |
| Hs.9842.0.S1_3p_at     | ---       | ---                                                                                                  | ---        | 6.7  | 3.0 | 0.0312 |
| g1000093_3p_a_at       | Hs.77204  | centromere protein F. 350/400ka<br>(mitosin)                                                         | CENPF      | 5.0  | 3.0 | 0.0349 |
| g8400737_3p_x_at       | Hs.408312 | tumor protein p53 (Li-Fraumeni<br>syndrome)                                                          | TP53       | 8.4  | 3.0 | 0.0203 |
| g13376746_3p_x_at      | Hs.288981 | chromosome 14 open reading frame<br>127                                                              | C14orf127  | 5.0  | 3.0 | 0.0487 |
| g10864014_3p_a_at      | Hs.432799 | signal recognition particle receptor. B<br>subunit                                                   | SRPRB      | 9.0  | 3.0 | 0.0182 |

|                        |           |                                                                        |           |      |     |        |
|------------------------|-----------|------------------------------------------------------------------------|-----------|------|-----|--------|
| g4885132_3p_a_at       | Hs.77204  | centromere protein F. 350/400ka (mitosin)                              | CENPF     | 6.8  | 3.0 | 0.0109 |
| g7770071_3p_a_at       | Hs.172801 | isoleucine-tRNA synthetase                                             | IARS      | 8.6  | 3.0 | 0.0212 |
| Hs.133294.1.A1_3p_a_at | ---       | ---                                                                    | ---       | 5.8  | 3.0 | 0.0225 |
| g13623694_3p_s_at      | Hs.128861 | hypothetical protein MGC4308                                           | MGC4308   | 5.5  | 2.9 | 0.0490 |
| Hs.289721.1.S1_3p_s_at | Hs.19340  | growth arrest-specific 5                                               | GAS5      | 10.3 | 2.9 | 0.0254 |
| g7657426_3p_at         | Hs.49760  | origin recognition complex. subunit 6 homolog-like (yeast)             | ORC6L     | 7.8  | 2.9 | 0.0114 |
| g12052970_3p_s_at      | Hs.299208 | coenzyme Q3 homolog. methyltransferase (yeast)                         | COQ3      | 7.6  | 2.9 | 0.0363 |
| Hs.27931.0.S1_3p_at    | Hs.478025 | glucosamine-phosphate N-acetyltransferase 1                            | GNPNAT1   | 8.5  | 2.9 | 0.0166 |
| Hs.108106.0.A2_3p_at   | Hs.108106 | ubiquitin-like. containing PHD and RING finger domains. 1              | UHRF1     | 6.0  | 2.9 | 0.0294 |
| g1695881_3p_at         | Hs.69360  | kinesin family member 2C                                               | KIF2C     | 7.2  | 2.9 | 0.0225 |
| Hs.127264.0.A1_3p_at   | ---       | ---                                                                    | ---       | 7.6  | 2.9 | 0.0416 |
| Hs.180582.0.S1_3p_at   | Hs.502848 | hypothetical protein FLJ40869                                          | FLJ40869  | 5.9  | 2.9 | 0.0365 |
| g12232386_3p_a_at      | Hs.510265 | nuclear ubiquitous casein kinase and cyclin-dependent kinase substrate | NUCKS     | 9.1  | 2.8 | 0.0338 |
| g12655170_3p_s_at      | Hs.23348  | S-phase kinase-associated protein 2 (p45)                              | SKP2      | 8.6  | 2.8 | 0.0274 |
| g4505332_3p_a_at       | Hs.446206 | nuclear autoantigenic sperm protein (histone-binding)                  | NASP      | 8.1  | 2.8 | 0.0207 |
| Hs.182490.0.S1_3p_s_at | Hs.182490 | leucine-rich PPR-motif containing                                      | LRPPRC    | 9.8  | 2.8 | 0.0430 |
| g7656903_3p_s_at       | Hs.102336 | Rho GTPase activating protein 8                                        | ARHGAP8   | 6.8  | 2.8 | 0.0207 |
| Hs.30212.2.S1_3p_x_at  | Hs.356247 | Aminoacylase 1-like 2                                                  | ACY1L2    | 7.4  | 2.8 | 0.0476 |
| Hs.112193.1.S2_3p_at   | Hs.132399 | mutS homolog 5 (E. coli)                                               | MSH5      | 7.8  | 2.8 | 0.0037 |
| Hs.15243.0.S1_3p_at    | Hs.15243  | nucleolar protein 1. 120kDa                                            | NOL1      | 8.2  | 2.8 | 0.0037 |
| Hs.93589.0.S1_3p_s_at  | Hs.444229 | Rho GTPase activating protein 24                                       | ARHGAP24  | 6.6  | 2.8 | 0.0408 |
| g13111771_3p_a_at      | Hs.436849 | hypothetical protein FLJ10521                                          | FLJ10521  | 8.6  | 2.8 | 0.0236 |
| 214662_3p_at           | Hs.169863 | WD repeat domain 43                                                    | WDR43     | 7.3  | 2.8 | 0.0206 |
| g6325471_3p_a_at       | Hs.448396 | ribosomal protein L10a                                                 | RPL10A    | 9.8  | 2.8 | 0.0423 |
| Hs.111496.0.S1_3p_at   | Hs.111496 | hypothetical protein LOC139886                                         | LOC139886 | 6.1  | 2.8 | 0.0480 |
| g12652570_3p_s_at      | Hs.424551 | chromosome 15 open reading frame 22                                    | C15orf22  | 9.2  | 2.8 | 0.0235 |
| g2739055_3p_a_at       | Hs.125124 | EPH receptor B2                                                        | EPHB2     | 7.6  | 2.8 | 0.0054 |
| g6652811_3p_at         | Hs.226391 | anterior gradient 2 homolog (Xenopus laevis)                           | AGR2      | 11.4 | 2.8 | 0.0314 |
| g10445222_3p_at        | Hs.454495 | ribosomal protein L36a                                                 | RPL36A    | 10.3 | 2.8 | 0.0360 |

|                      |           |                                                                        |           |      |     |        |
|----------------------|-----------|------------------------------------------------------------------------|-----------|------|-----|--------|
| g4502712_3p_s_at     | Hs.114311 | CDC45 cell division cycle 45-like (S. cerevisiae)                      | CDC45L    | 6.5  | 2.8 | 0.0343 |
| g4502612_3p_at       | Hs.85137  | cyclin A2                                                              | CCNA2     | 4.3  | 2.8 | 0.0332 |
| g177109_3p_s_at      | Hs.182490 | leucine-rich PPR-motif containing                                      | LRPPRC    | 9.5  | 2.8 | 0.0239 |
| Hs.173802.0.S2_3p_at | Hs.173802 | TBC1 domain family. member 4                                           | TBC1D4    | 8.5  | 2.8 | 0.0157 |
| g6631086_3p_s_at     | Hs.528686 | high mobility group AT-hook 2                                          | HMGA2     | 6.9  | 2.8 | 0.0104 |
| g4506960_3p_x_at     | Hs.102456 | survival of motor neuron protein interacting protein 1                 | SIP1      | 5.0  | 2.7 | 0.0436 |
| g12056970_3p_at      | Hs.436527 | anaphase promoting complex subunit 1                                   | ANAPC1    | 7.6  | 2.7 | 0.0398 |
| g4504896_3p_at       | Hs.159557 | karyopherin alpha 2 (RAG cohort 1. importin alpha 1)                   | KPNA2     | 10.3 | 2.7 | 0.0138 |
| g12232404_3p_at      | Hs.195345 | hypothetical protein FLJ22390                                          | FLJ22390  | 5.9  | 2.7 | 0.0385 |
| g5031794_3p_at       | ---       | ---                                                                    | ---       | 7.2  | 2.7 | 0.0188 |
| g4504960_3p_at       | Hs.435166 | lamin B receptor                                                       | LBR       | 11.1 | 2.7 | 0.0138 |
| g11967984_3p_at      | Hs.74899  | chromosome 10 open reading frame 117                                   | C10orf117 | 7.2  | 2.7 | 0.0257 |
| Hs.288809.0.S2_3p_at | Hs.288809 | basic. immunoglobulin-like variable motif containing                   | BIVM      | 9.3  | 2.7 | 0.0189 |
| g7661865_3p_at       | Hs.443866 | KIAA0020                                                               | KIAA0020  | 6.2  | 2.7 | 0.0449 |
| g400340_3p_s_at      | Hs.326249 | ribosomal protein L22                                                  | RPL22     | 10.1 | 2.7 | 0.0333 |
| Hs.1192.0.S1_3p_at   | Hs.308045 | barren homolog (Drosophila)                                            | BRRN1     | 6.9  | 2.6 | 0.0359 |
| g9558738_3p_at       | Hs.23642  | likely ortholog of mouse Sac3 homology domain 1 (S. cerevisiae)        | SHD1      | 8.7  | 2.6 | 0.0430 |
| g6841565_3p_a_at     | Hs.9081   | phenylalanine-tRNA synthetase-like. beta subunit                       | FARSLB    | 9.1  | 2.6 | 0.0191 |
| g9963834_3p_at       | Hs.421956 | kinetochore protein Spc25                                              | Spc25     | 5.6  | 2.6 | 0.0154 |
| Hs.22123.0.A1_3p_at  | Hs.238889 | Unc-5 homolog D (C. elegans)                                           | UNC5D     | 7.5  | 2.6 | 0.0128 |
| Hs.98402.0.A1_3p_at  | ---       | ---                                                                    | ---       | 6.3  | 2.6 | 0.0333 |
| Hs.180789.0.S2_3p_at | Hs.197184 | RNA binding motif protein 25                                           | RBM25     | 10.2 | 2.6 | 0.0350 |
| g12804374_3p_at      | Hs.27693  | peptidylprolyl isomerase (cyclophilin)-like 1                          | PPIL1     | 7.1  | 2.6 | 0.0422 |
| Hs.4747.1.S1_3p_a_at | Hs.4747   | dyskeratosis congenita 1. dyskerin                                     | DKC1      | 7.6  | 2.6 | 0.0275 |
| g4758849_3p_at       | Hs.17908  | origin recognition complex. subunit 1-like (yeast)                     | ORC1L     | 4.7  | 2.6 | 0.0430 |
| g5729733_3p_a_at     | Hs.152759 | activator of S phase kinase                                            | ASK       | 6.9  | 2.6 | 0.0362 |
| g11386144_3p_s_at    | Hs.239    | forkhead box M1                                                        | FOXM1     | 7.1  | 2.6 | 0.0188 |
| g7657117_3p_at       | Hs.54609  | glycine C-acetyltransferase (2-amino-3-ketobutyrate coenzyme A ligase) | GCAT      | 7.4  | 2.6 | 0.0090 |



|                        |           |                                                                                     |           |      |     |        |
|------------------------|-----------|-------------------------------------------------------------------------------------|-----------|------|-----|--------|
| Hs.113503.0.S2_3p_a_at | Hs.113503 | RAN binding protein 5                                                               | RANBP5    | 6.5  | 2.6 | 0.0179 |
| Hs.2316.0.S1_3p_a_at   | Hs.2316   | SRX (sex determining region Y)-box 9 (campomelic dysplasia, autosomal sex-reversal) | SOX9      | 6.1  | 2.5 | 0.0476 |
| g9558738_3p_x_at       | Hs.23642  | likely ortholog of mouse Sac3 homology domain 1 ( <i>S. cerevisiae</i> )            | SHD1      | 8.8  | 2.5 | 0.0435 |
| g6912339_3p_s_at       | Hs.367821 | deoxythymidylate kinase (thymidylate kinase)                                        | DTYMK     | 8.4  | 2.5 | 0.0183 |
| 229700_3p_at           | Hs.444206 | hypothetical protein LOC148203                                                      | LOC148203 | 6.0  | 2.5 | 0.0257 |
| g13514830_3p_at        | Hs.41706  | DEAD (Asp-Glu-Ala-Asp) box polypeptide 10                                           | DDX10     | 7.4  | 2.5 | 0.0292 |
| Hs.117487.0.S1_3p_a_at | Hs.398178 | chromosome 4 open reading frame 9                                                   | C4orf9    | 8.1  | 2.5 | 0.0274 |
| g13376157_3p_at        | Hs.370147 | hypothetical protein FLJ22490                                                       | FLJ22490  | 8.6  | 2.5 | 0.0385 |
| g12053106_3p_at        | Hs.273294 | Abelson helper integration site                                                     | AHI1      | 7.6  | 2.5 | 0.0312 |
| g179364_3p_x_at        | Hs.371468 | cyclin D1 (PRAD1: parathyroid adenomatosis 1)                                       | CCND1     | 8.5  | 2.5 | 0.0428 |
| g4506694_3p_at         | Hs.381184 | ribosomal protein S19                                                               | RPS19     | 11.4 | 2.5 | 0.0381 |
| g7705402_3p_a_at       | Hs.369284 | chromosome 20 open reading frame 6                                                  | C20orf6   | 9.2  | 2.5 | 0.0277 |
| g7661729_3p_a_at       | Hs.55097  | mitochondrial ribosomal protein S28                                                 | MRPS28    | 7.5  | 2.5 | 0.0408 |
| g13376651_3p_at        | Hs.353181 | hypothetical protein FLJ22635                                                       | FLJ22635  | 8.5  | 2.5 | 0.0450 |
| Hs.292457.0.S1_3p_at   | Hs.356331 | peptidylprolyl isomerase A (cyclophilin A)                                          | PPIA      | 10.4 | 2.5 | 0.0225 |
| Hs.288809.1.S1_3p_x_at | Hs.288809 | basic, immunoglobulin-like variable motif containing                                | BIVM      | 4.9  | 2.5 | 0.0138 |
| g409069_3p_s_at        | Hs.326249 | ribosomal protein L22                                                               | RPL22     | 10.2 | 2.5 | 0.0430 |
| g4506648_3p_s_at       | Hs.119598 | ribosomal protein L3                                                                | RPL3      | 12.1 | 2.4 | 0.0211 |
| 222761_3p_at           | Hs.288809 | basic, immunoglobulin-like variable motif containing                                | BIVM      | 7.9  | 2.4 | 0.0239 |
| 214042_3p_s_at         | Hs.326249 | ribosomal protein L22                                                               | RPL22     | 10.0 | 2.4 | 0.0402 |
| Hs.117102.0.S2_3p_at   | Hs.311097 | exportin 4                                                                          | XPO4      | 7.8  | 2.4 | 0.0446 |
| g8922791_3p_at         | Hs.144407 | nudix (nucleoside diphosphate linked moiety X)-type motif 15                        | NUDT15    | 8.8  | 2.4 | 0.0387 |
| Hs.115660.0.S2_3p_at   | Hs.115660 | DNA cross-link repair 1B (PSO2 homolog, <i>S. cerevisiae</i> )                      | DCLRE1B   | 4.0  | 2.4 | 0.0294 |
| Hs.38178.2.S1_3p_at    | Hs.38178  | MLF1 interacting protein                                                            | MLF1IP    | 5.4  | 2.4 | 0.0138 |
| g13376190_3p_at        | Hs.326725 | FLJ22624 protein                                                                    | FLJ22624  | 7.1  | 2.4 | 0.0087 |
| g13129021_3p_at        | Hs.208912 | chromosome 22 open reading frame 18                                                 | C22orf18  | 7.5  | 2.4 | 0.0223 |
| g12653842_3p_a_at      | Hs.20830  | Kinesin family member C1                                                            | KIFC1     | 7.0  | 2.4 | 0.0103 |

|                       |           |                                                                                                |          |      |     |        |
|-----------------------|-----------|------------------------------------------------------------------------------------------------|----------|------|-----|--------|
| Hs.122908.1.S1_3p_at  | Hs.122908 | DNA replication factor                                                                         | CDT1     | 7.0  | 2.4 | 0.0387 |
| g8922949_3p_at        | Hs.303573 | meiosis-specific nuclear structural protein 1                                                  | MNS1     | 4.5  | 2.4 | 0.0172 |
| Hs.62918.0.S1_3p_at   | Hs.62918  | CDC91 cell division cycle 91-like 1 (S. cerevisiae)                                            | CDC91L1  | 8.7  | 2.4 | 0.0130 |
| g2317691_3p_at        | Hs.90280  | 5-aminoimidazole-4-carboxamide ribonucleotide formyltransferase/IMP cyclohydrolase             | ATIC     | 9.6  | 2.4 | 0.0385 |
| g10445222_3p_x_at     | Hs.454495 | ribosomal protein L36a                                                                         | RPL36A   | 11.6 | 2.4 | 0.0350 |
| g5453631_3p_at        | Hs.16244  | sperm associated antigen 5                                                                     | SPAG5    | 7.6  | 2.4 | 0.0166 |
| Hs.28540.0.S1_3p_at   | Hs.28540  | Transcribed locus. weakly similar to XP_375099.1 hypothetical protein LOC283585 [Homo sapiens] | ---      | 7.2  | 2.4 | 0.0463 |
| g7661965_3p_a_at      | Hs.433653 | Mediator of DNA damage checkpoint 1                                                            | MDC1     | 6.6  | 2.4 | 0.0182 |
| Hs.62918.0.S1_3p_x_at | Hs.62918  | CDC91 cell division cycle 91-like 1 (S. cerevisiae)                                            | CDC91L1  | 8.6  | 2.4 | 0.0108 |
| Hs.168950.0.S2_3p_at  | Hs.168950 | Ganglioside-induced differentiation-associated protein 1                                       | GDAP1    | 5.5  | 2.3 | 0.0239 |
| g4504520_3p_a_at      | Hs.79037  | heat shock 60kDa protein 1 (chaperonin)                                                        | HSPD1    | 11.7 | 2.3 | 0.0392 |
| g8923012_3p_at        | Hs.311559 | Notch homolog 1. translocation-associated (Drosophila)                                         | NOTCH1   | 7.1  | 2.3 | 0.0249 |
| g4507506_3p_a_at      | Hs.118631 | timeless homolog (Drosophila)                                                                  | TIMELESS | 7.5  | 2.3 | 0.0364 |
| g4505460_3p_at        | Hs.104925 | ectodermal-neural cortex (with BTB-like domain)                                                | ENC1     | 10.5 | 2.3 | 0.0458 |
| Hs.24724.1.A2_3p_at   | Hs.379414 | malignant fibrous histiocytoma amplified sequence 1                                            | MFHAS1   | 8.7  | 2.3 | 0.0228 |
| g4502780_3p_at        | Hs.75573  | centromere protein E. 312kDa                                                                   | CENPE    | 6.7  | 2.3 | 0.0126 |
| 208712_3p_at          | Hs.371468 | cyclin D1 (PRAD1: parathyroid adenomatosis 1)                                                  | CCND1    | 7.8  | 2.3 | 0.0413 |
| Hs.292570.0.S1_3p_at  | Hs.292570 | chromosome 9 open reading frame 112                                                            | C9orf112 | 8.7  | 2.3 | 0.0238 |
| g4505154_3p_at        | Hs.298289 | mesoderm specific transcript homolog (mouse)                                                   | MEST     | 9.2  | 2.3 | 0.0327 |
| Hs.112160.0.S1_3p_at  | Hs.458571 | chromosome 15 open reading frame 20                                                            | C15orf20 | 6.8  | 2.3 | 0.0364 |
| Hs.7517.0.S1_3p_at    | Hs.7517   | Chromosome 9 open reading frame 123                                                            | C9orf123 | 9.6  | 2.3 | 0.0405 |
| g12654424_3p_s_at     | Hs.534522 | epsin 3                                                                                        | EPN3     | 6.2  | 2.3 | 0.0092 |
| g7705424_3p_at        | Hs.44298  | mitochondrial ribosomal protein S17                                                            | MRPS17   | 6.8  | 2.3 | 0.0310 |

|                        |           |                                                                                                                                   |                    |      |     |        |
|------------------------|-----------|-----------------------------------------------------------------------------------------------------------------------------------|--------------------|------|-----|--------|
| 200089_s_at            | Hs.186350 | ribosomal protein L4 /// ribosomal protein L4                                                                                     | RPL4               | 11.4 | 2.3 | 0.0430 |
| Hs.31442.0.S1_3p_at    | ---       | ---                                                                                                                               | ---                | 8.2  | 2.3 | 0.0364 |
| g13375698_3p_at        | Hs.418233 | mitochondrial ribosomal protein L24                                                                                               | MRPL24             | 8.7  | 2.3 | 0.0294 |
| g6031190_3p_a_at       | Hs.75323  | prohibitin                                                                                                                        | PHB                | 8.0  | 2.3 | 0.0395 |
| g13129079_3p_a_at      | Hs.530463 | hypothetical protein MGC3196                                                                                                      | MGC3196            | 9.4  | 2.3 | 0.0415 |
| g12056472_3p_at        | Hs.274424 | N-acetylneuraminic acid synthase (sialic acid synthase)                                                                           | NANS               | 9.1  | 2.3 | 0.0189 |
| g10280619_3p_a_at      | Hs.243960 | NDRG family member 2                                                                                                              | NDRG2              | 9.9  | 2.3 | 0.0239 |
| Hs.116206.0.S1_3p_at   | Hs.191583 | Opa-interacting protein 5                                                                                                         | OIP5               | 6.9  | 2.3 | 0.0170 |
| g6382077_3p_a_at       | Hs.24763  | RAN binding protein 1                                                                                                             | RANBP1             | 7.1  | 2.3 | 0.0206 |
| g13775227_3p_s_at      | Hs.91103  | hypothetical protein MGC4293                                                                                                      | MGC4293            | 7.6  | 2.2 | 0.0382 |
| g12652540_3p_s_at      | Hs.386392 | nucleolar protein family A. member 2 (H/ACA small nucleolar RNPs)                                                                 | NOLA2              | 9.0  | 2.2 | 0.0230 |
| g8923292_3p_a_at       | Hs.18616  | more than blood homolog                                                                                                           | MTB                | 5.8  | 2.2 | 0.0478 |
| g4759155_3p_at         | Hs.173255 | small nuclear ribonucleoprotein polypeptide A                                                                                     | SNRPA              | 9.1  | 2.2 | 0.0182 |
| Hs.69559.0.S1_3p_a_at  | Hs.446197 | HBxAg transactivated protein 2                                                                                                    | XTP2               | 11.1 | 2.2 | 0.0261 |
| Hs.44860.0.S1_3p_at    | Hs.293533 | glutathione S-transferase omega 2                                                                                                 | GSTO2              | 8.3  | 2.2 | 0.0163 |
| Hs.16727.0.A1_3p_at    | ---       | ---                                                                                                                               | ---                | 7.2  | 2.2 | 0.0025 |
| 216449_3p_x_at         | Hs.192374 | tumor rejection antigen (gp96) 1                                                                                                  | TRA1               | 7.9  | 2.2 | 0.0430 |
| Hs.250655.0.S1_3p_x_at | Hs.264317 | prothymosin. alpha (gene sequence 28)                                                                                             | PTMA               | 13.2 | 2.2 | 0.0156 |
| 215946_3p_x_at         | Hs.407693 | similar to bK246H3.1 (immunoglobulin lambda-like polypeptide 1. pre-B-cell specific) /// immunoglobulin lambda-like polypeptide 1 | LOC91316 /// IGLL1 | 8.4  | 2.2 | 0.0277 |
| g2367403_3p_at         | Hs.30035  | splicing factor. arginine/serine-rich 10 (transformer 2 homolog. Drosophila)                                                      | SFRS10             | 6.7  | 2.2 | 0.0350 |
| 214723_3p_x_at         | Hs.469358 | KIAA1641                                                                                                                          | KIAA1641           | 6.1  | 2.2 | 0.0239 |
| g7657235_3p_at         | Hs.367992 | inositol(myo)-1(or 4)-monophosphatase 2                                                                                           | IMPA2              | 8.1  | 2.2 | 0.0365 |
| Hs.324470.1.S1_3p_a_at | Hs.324470 | adducin 3 (gamma)                                                                                                                 | ADD3               | 8.3  | 2.2 | 0.0184 |
| g13623708_3p_s_at      | Hs.119598 | ribosomal protein L3                                                                                                              | RPL3               | 12.3 | 2.2 | 0.0458 |
| g10864016_3p_a_at      | Hs.18442  | E-1 enzyme                                                                                                                        | MASA               | 8.3  | 2.2 | 0.0442 |
| g7705422_3p_at         | Hs.279913 | processing of precursor 5. ribonuclease P/MRP subunit (S. cerevisiae)                                                             | POP5               | 9.0  | 2.2 | 0.0238 |

|                         |           |                                                                  |           |      |     |        |
|-------------------------|-----------|------------------------------------------------------------------|-----------|------|-----|--------|
| g13436139_3p_s_at       | Hs.433427 | ribosomal protein S17                                            | RPS17     | 12.2 | 2.2 | 0.0372 |
| g4506692_3p_s_at        | Hs.433427 | ribosomal protein S17                                            | RPS17     | 12.2 | 2.1 | 0.0380 |
| g4504168_3p_at          | Hs.82327  | glutathione synthetase                                           | GSS       | 9.9  | 2.1 | 0.0225 |
| g5454101_3p_at          | Hs.104019 | transforming, acidic coiled-coil containing protein 3            | TACC3     | 7.4  | 2.1 | 0.0436 |
| Hs.76989.0.S1_3p_a_at   | Hs.201253 | KIAA0097 gene product                                            | ch-TOG    | 9.0  | 2.1 | 0.0309 |
| g3282822_3p_at          | Hs.107474 | NGFI-A binding protein 1 (EGR1 binding protein 1)                | NAB1      | 8.6  | 2.1 | 0.0182 |
| Hs.306794.0.S1_3p_at    | Hs.269777 | Protein phosphatase 1, regulatory (inhibitor) subunit 12B        | PPP1R12B  | 6.7  | 2.1 | 0.0450 |
| Hs.180842.1.A1_3p_x_at  | Hs.410817 | ribosomal protein L13                                            | RPL13     | 11.8 | 2.1 | 0.0374 |
| Hs.5174.2.S1_3p_s_at    | Hs.433427 | ribosomal protein S17                                            | RPS17     | 12.3 | 2.1 | 0.0411 |
| Hs2.146973.1.S1_3p_s_at | Hs.94308  | RAB35, member RAS oncogene family                                | RAB35     | 6.2  | 2.1 | 0.0437 |
| g5174448_3p_at          | Hs.75307  | H1 histone family, member X                                      | H1FX      | 9.1  | 2.1 | 0.0190 |
| Hs.12520.0.S2_3p_at     | Hs.12520  | hypothetical protein LOC257407                                   | LOC257407 | 8.2  | 2.1 | 0.0232 |
| g4506672_3p_at          | Hs.109059 | mitochondrial ribosomal protein L12                              | MRPL12    | 8.5  | 2.1 | 0.0497 |
| Hs.108124.5.A1_3p_a_at  | Hs.446628 | ribosomal protein S4, X-linked                                   | RPS4X     | 12.5 | 2.1 | 0.0101 |
| g7305204_3p_at          | Hs.279766 | kinesin family member 4A                                         | KIF4A     | 7.5  | 2.1 | 0.0151 |
| g388890_3p_x_at         | Hs.89643  | transketolase (Wernicke-Korsakoff syndrome)                      | TKT       | 9.5  | 2.1 | 0.0460 |
| g2959555_3p_a_at        | Hs.72550  | hyaluronan-mediated motility receptor (RHAMM)                    | HMMR      | 7.4  | 2.1 | 0.0387 |
| 200061_s_at             | Hs.356794 | ribosomal protein S24 /// ribosomal protein S24                  | RPS24     | 12.1 | 2.1 | 0.0332 |
| Hs.105187.1.S1_3p_a_at  | Hs.373627 | kinesin family member 9                                          | KIF9      | 6.9  | 2.1 | 0.0411 |
| Hs.298262.1.S1_3p_x_at  | Hs.381184 | ribosomal protein S19                                            | RPS19     | 11.9 | 2.1 | 0.0458 |
| Hs.173310.2.A1_3p_s_at  | Hs.315167 | defective in sister chromatid cohesion homolog 1 (S. cerevisiae) | DCC1      | 5.2  | 2.1 | 0.0129 |
| Hs.323439.0.A1_3p_at    | Hs.6168   | KIAA0703 gene product                                            | KIAA0703  | 8.3  | 2.1 | 0.0106 |
| g12805036_3p_s_at       | Hs.355750 | hypothetical protein MGC5306                                     | MGC5306   | 9.0  | 2.1 | 0.0293 |
| g13112024_3p_a_at       | Hs.433180 | DNA replication complex GINS protein PSF2                        | Pfs2      | 8.1  | 2.1 | 0.0312 |
| g4506724_3p_a_at        | Hs.446628 | ribosomal protein S4, X-linked                                   | RPS4X     | 12.5 | 2.1 | 0.0100 |
| g6325471_3p_s_at        | Hs.448396 | ribosomal protein L10a                                           | RPL10A    | 12.6 | 2.1 | 0.0232 |
| g6005859_3p_x_at        | Hs.182825 | ribosomal protein L35                                            | RPL35     | 12.0 | 2.0 | 0.0238 |
| Hs2.429227.1.S1_3p_s_at | Hs.433180 | DNA replication complex GINS protein PSF2                        | Pfs2      | 4.9  | 2.0 | 0.0380 |
| g13399321_3p_at         | Hs.438995 | N-acetyltransferase-like protein                                 | FLJ10774  | 9.0  | 2.0 | 0.0239 |

|                        |           |                                                                |           |      |     |        |
|------------------------|-----------|----------------------------------------------------------------|-----------|------|-----|--------|
| Hs.100555.1.S1_3p_a_at | Hs.363492 | DEAD (Asp-Glu-Ala-Asp) box polypeptide 18                      | DDX18     | 8.6  | 2.0 | 0.0416 |
| Hs.296559.0.S1_3p_at   | ---       | ---                                                            | ---       | 8.5  | 2.0 | 0.0257 |
| Hs.129055.2.S1_3p_at   | Hs.129055 | outer dense fiber of sperm tails 2                             | ODF2      | 7.4  | 2.0 | 0.0266 |
| g12653774_3p_s_at      | Hs.443796 | ribosomal protein. large. P0                                   | RPLP0     | 12.5 | 2.0 | 0.0408 |
| g13027613_3p_at        | ---       | hypothetical protein MGC3032                                   | MGC3032   | 6.9  | 2.0 | 0.0182 |
| g13443017_3p_at        | Hs.15277  | chromosome 16 open reading frame 33                            | C16orf33  | 8.0  | 2.0 | 0.0179 |
| g5901939_3p_a_at       | Hs.251673 | DNA (cytosine-5-)-methyltransferase 3 beta                     | DNMT3B    | 5.3  | 2.0 | 0.0416 |
| 200034_s_at            | Hs.416566 | ribosomal protein L6 /// ribosomal protein L6                  | RPL6      | 10.9 | 2.0 | 0.0435 |
| g4503784_3p_at         | Hs.360041 | frataxin                                                       | FXN       | 7.4  | 2.0 | 0.0138 |
| g4507472_3p_a_at       | Hs.161999 | TGFB-induced factor (TALE family homeobox)                     | TGIF      | 8.6  | 2.0 | 0.0491 |
| g3126638_3p_a_at       | Hs.334562 | cell division cycle 2. G1 to S and G2 to M                     | CDC2      | 6.1  | 2.0 | 0.0305 |
| g4589609_3p_x_at       | Hs.75361  | chromosome 22 open reading frame 19                            | C22orf19  | 7.2  | 2.0 | 0.0170 |
| Hs.162246.0.A1_3p_at   | Hs.162246 | hypothetical protein LOC134285                                 | LOC134285 | 8.9  | 2.0 | 0.0293 |
| g1906010_3p_a_at       | Hs.355533 | adenosine kinase                                               | ADK       | 7.8  | 2.0 | 0.0441 |
| Hs.18760.0.S1_3p_at    | Hs.498063 | signal-induced proliferation-associated 1 like 2               | SIPA1L2   | 7.4  | 2.0 | 0.0436 |
| g4885104_3p_x_at       | Hs.75238  | chromatin assembly factor 1. subunit B (p60)                   | CHAF1B    | 6.3  | 2.0 | 0.0453 |
| g4506742_3p_s_at       | Hs.512675 | ribosomal protein S8                                           | RPS8      | 13.2 | 2.0 | 0.0197 |
| 208837_3p_at           | Hs.424551 | chromosome 15 open reading frame 22                            | C15orf22  | 7.5  | 2.0 | 0.0224 |
| Hs.91728.1.A1_3p_at    | Hs.85137  | cyclin A2                                                      | CCNA2     | 7.0  | 2.0 | 0.0264 |
| Hs.80961.1.A2_3p_at    | Hs.334828 | hypothetical protein FLJ10719                                  | FLJ10719  | 4.7  | 2.0 | 0.0350 |
| g4826859_3p_at         | Hs.182255 | NHP2 non-histone chromosome protein 2-like 1 (S. cerevisiae)   | NHP2L1    | 9.2  | 2.0 | 0.0453 |
| g12804504_3p_a_at      | Hs.375921 | ribosomal protein L31                                          | RPL31     | 8.1  | 1.9 | 0.0364 |
| g4502144_3p_a_at       | Hs.1578   | baculoviral IAP repeat-containing 5 (survivin)                 | BIRC5     | 7.4  | 1.9 | 0.0035 |
| g12653502_3p_s_at      | Hs.356794 | ribosomal protein S24                                          | RPS24     | 12.7 | 1.9 | 0.0170 |
| Hs.113503.0.S4_3p_at   | Hs.113503 | RAN binding protein 5                                          | RANBP5    | 8.1  | 1.9 | 0.0222 |
| g12006349_3p_a_at      | Hs.381219 | ribosomal protein L15                                          | RPL15     | 11.7 | 1.9 | 0.0441 |
| g5174722_3p_s_at       | Hs.310542 | translocase of outer mitochondrial membrane 40 homolog (yeast) | TOMM40    | 7.9  | 1.9 | 0.0138 |

|                         |           |                                                                                                           |                  |      |     |        |
|-------------------------|-----------|-----------------------------------------------------------------------------------------------------------|------------------|------|-----|--------|
| g7019470_3p_at          | Hs.283375 | NTF2-like export factor 1                                                                                 | NXT1             | 6.8  | 1.9 | 0.0490 |
| g4508030_3p_at          | Hs.127476 | zinc finger protein 74 (Cos52)                                                                            | ZNF74            | 6.4  | 1.9 | 0.0101 |
| Hs2.355309.3.S1_3p_a_at | Hs.412323 | KIAA1937 protein                                                                                          | KIAA1937         | 9.4  | 1.9 | 0.0467 |
| 200772_3p_x_at          | Hs.264317 | prothymosin. alpha (gene sequence 28)                                                                     | PTMA             | 8.7  | 1.9 | 0.0402 |
| g12653688_3p_a_at       | Hs.32393  | aspartyl-tRNA synthetase                                                                                  | DARS             | 9.4  | 1.9 | 0.0458 |
| g13699831_3p_a_at       | Hs.270845 | kinesin family member 23                                                                                  | KIF23            | 3.8  | 1.9 | 0.0286 |
| 1563796_3p_s_at         | Hs.444353 | KIAA1970 protein                                                                                          | KIAA1970         | 6.0  | 1.9 | 0.0365 |
| Hs.48480.0.A1_3p_at     | Hs.48480  | zinc finger protein 367                                                                                   | ZNF367           | 5.7  | 1.9 | 0.0430 |
| Hs.301927.1.A1_3p_a_at  | Hs.301927 | c6.1A                                                                                                     | C6.1A            | 9.4  | 1.9 | 0.0449 |
| 208549_3p_x_at          | Hs.264317 | prothymosin. alpha (gene sequence 28)                                                                     | PTMA             | 9.2  | 1.9 | 0.0453 |
| Hs.44566.1.A1_3p_x_at   | Hs.469358 | KIAA1641                                                                                                  | KIAA1641         | 4.4  | 1.9 | 0.0460 |
| Hs.226562.0.S1_3p_at    | Hs.200228 | ets homologous factor                                                                                     | EHF              | 6.5  | 1.8 | 0.0385 |
| Hs.314347.0.S1_3p_at    | Hs.272210 | activating transcription factor 7 interacting protein                                                     | ATF7IP           | 8.1  | 1.8 | 0.0393 |
| g10835100_3p_at         | Hs.101067 | GCN5 general control of amino-acid synthesis 5-like 2 (yeast)                                             | GCN5L2           | 9.0  | 1.8 | 0.0411 |
| 4873394C_3p_s_at        | Hs.54702  | xylosylprotein beta 1.4-galactosyltransferase. polypeptide 7 (galactosyltransferase I)                    | B4GALT7          | 8.7  | 1.8 | 0.0449 |
| 229220_3p_x_at          | Hs.15825  | Homo sapiens. clone IMAGE:4151011. mRNA                                                                   | ---              | 6.6  | 1.8 | 0.0125 |
| Hs.17154.0.S1_3p_at     | Hs.439530 | dual-specificity tyrosine-(Y)-phosphorylation regulated kinase 4                                          | DYRK4            | 7.7  | 1.8 | 0.0332 |
| g1255616_3p_a_at        | Hs.438720 | MCM7 minichromosome maintenance deficient 7 (S. cerevisiae)                                               | MCM7             | 9.3  | 1.8 | 0.0398 |
| g6005859_3p_at          | Hs.182825 | ribosomal protein L35                                                                                     | RPL35            | 11.7 | 1.8 | 0.0263 |
| Hs.125608.0.A1_3p_at    | Hs.125608 | chromosome 9 open reading frame 152                                                                       | C9orf152         | 6.6  | 1.8 | 0.0440 |
| g11038647_3p_at         | Hs.28853  | CDC7 cell division cycle 7 (S. cerevisiae)                                                                | CDC7             | 5.0  | 1.8 | 0.0347 |
| g12053028_3p_at         | Hs.183428 | sarcospan (Kras oncogene-associated gene)                                                                 | SSPN             | 5.8  | 1.8 | 0.0206 |
| Hs.31476.0.S1_3p_at     | Hs.370420 | tubulin. gamma complex associated protein 5                                                               | TUBGCP5          | 6.6  | 1.8 | 0.0110 |
| g4506656_3p_a_at        | Hs.416566 | ribosomal protein L6                                                                                      | RPL6             | 12.8 | 1.8 | 0.0106 |
| g5174446_3p_at          | Hs.351839 | ovarian zinc finger protein /// guanine nucleotide binding protein (G protein). beta polypeptide 2-like 1 | HOZFP /// GNB2L1 | 12.3 | 1.8 | 0.0450 |

|                        |           |                                                                                               |                 |      |     |        |
|------------------------|-----------|-----------------------------------------------------------------------------------------------|-----------------|------|-----|--------|
| g13376508_3p_at        | Hs.194754 | hypothetical protein MGC29875                                                                 | MGC29875        | 7.5  | 1.8 | 0.0403 |
| 220176_3p_at           | Hs.288981 | chromosome 14 open reading frame 127                                                          | C14orf127       | 5.9  | 1.8 | 0.0280 |
| Hs.247877.0.S1_3p_at   | Hs.421257 | ribosomal protein L7                                                                          | RPL7            | 7.5  | 1.8 | 0.0391 |
| g12653526_3p_a_at      | Hs.14468  | peter pan homolog (Drosophila)                                                                | PPAN            | 7.9  | 1.8 | 0.0389 |
| Hs.296559.0.S1_3p_x_at | ---       | ---                                                                                           | ---             | 8.7  | 1.8 | 0.0392 |
| Hs.248080.0.S1_3p_at   | ---       | ---                                                                                           | ---             | 8.9  | 1.8 | 0.0476 |
| 219000_3p_s_at         | Hs.315167 | defective in sister chromatid cohesion homolog 1 (S. cerevisiae)                              | DCC1            | 7.2  | 1.7 | 0.0293 |
| g13111838_3p_s_at      | Hs.256583 | interleukin enhancer binding factor 3. 90kDa                                                  | ILF3            | 8.1  | 1.7 | 0.0446 |
| g4506636_3p_s_at       | Hs.250895 | ribosomal protein L34                                                                         | RPL34           | 13.0 | 1.7 | 0.0249 |
| g7705838_3p_at         | Hs.279209 | NY-REN-58 antigen                                                                             | NY-REN-58       | 6.5  | 1.7 | 0.0244 |
| g11386190_3p_a_at      | Hs.274151 | ligatin                                                                                       | LGTN            | 9.0  | 1.7 | 0.0087 |
| Hs.323053.0.S1_3p_at   | Hs.323053 | Hypothetical protein DKFZp547K1113                                                            | DKFZp547K1113   | 6.8  | 1.7 | 0.0125 |
| g12654388_3p_a_at      | Hs.300141 | ribosomal protein L39                                                                         | RPL39           | 13.1 | 1.7 | 0.0364 |
| g5174636_3p_at         | Hs.22516  | peptidylprolyl isomerase E (cyclophilin E)                                                    | PPIE            | 8.1  | 1.7 | 0.0086 |
| g13654275_3p_s_at      | Hs.323084 | queuine tRNA-ribosyltransferase 1 (tRNA-guanine transglycosylase)                             | QTRT1           | 8.7  | 1.7 | 0.0450 |
| Hs2.427928.1.S1_3p_at  | Hs.516253 | Hypothetical gene supported by BC040598                                                       | ---             | 6.4  | 1.7 | 0.0341 |
| g8922398_3p_at         | Hs.102842 | polymerase (RNA) III (DNA directed) polypeptide B                                             | POLR3B          | 7.9  | 1.7 | 0.0182 |
| g4508030_3p_x_at       | Hs.127476 | zinc finger protein 74 (Cos52)                                                                | ZNF74           | 8.3  | 1.7 | 0.0474 |
| g4506654_3p_x_at       | Hs.469653 | ribosomal protein L5                                                                          | RPL5            | 13.1 | 1.7 | 0.0398 |
| g9845503_3p_at         | Hs.99171  | neurotrophin 3                                                                                | NTF3            | 6.5  | 1.7 | 0.0365 |
| Hs.192789.0.S1_3p_a_at | Hs.334788 | nuclear factor of activated T-cells. cytoplasmic. calcineurin-dependent 2 interacting protein | FLJ14639        | 8.5  | 1.7 | 0.0343 |
| g4507274_3p_s_at       | Hs.250822 | serine/threonine kinase 6                                                                     | STK6            | 7.3  | 1.7 | 0.0408 |
| g11968036_3p_a_at      | Hs.242327 | hypothetical protein FLJ13576                                                                 | FLJ13576        | 10.8 | 1.7 | 0.0383 |
| Hs.133481.0.A1_3p_at   | Hs.99472  | MRNA; cDNA DKFZp564O0862 (from clone DKFZp564O0862)                                           | ---             | 5.8  | 1.6 | 0.0442 |
| Hs.288809.0.S2_3p_a_at | Hs.288809 | basic. immunoglobulin-like variable motif containing                                          | BIVM            | 3.8  | 1.6 | 0.0372 |
| Hs.211506.0.S1_3p_at   | Hs.521097 | pituitary tumor-transforming 3 /// pituitary tumor-transforming 2                             | PTTG3 /// PTTG2 | 4.1  | 1.6 | 0.0261 |
| g13623450_3p_s_at      | Hs.122552 | G-2 and S-phase expressed 1                                                                   | GTSE1           | 7.2  | 1.6 | 0.0332 |

|                        |           |                                                                                        |          |     |     |        |
|------------------------|-----------|----------------------------------------------------------------------------------------|----------|-----|-----|--------|
| g7019544_3p_a_at       | Hs.109494 | secreted protein of unknown function                                                   | SPUF     | 7.9 | 1.6 | 0.0218 |
| Hs.142634.0.S1_3p_a_at | Hs.438994 | zinc finger protein 544                                                                | ZNF544   | 7.4 | 1.6 | 0.0095 |
| Hs.170226.0.S1_3p_at   | Hs.170226 | chromosome 9 open reading frame 91                                                     | C9orf91  | 5.2 | 1.6 | 0.0205 |
| g12653526_3p_x_at      | Hs.14468  | peter pan homolog (Drosophila)                                                         | PPAN     | 7.7 | 1.6 | 0.0203 |
| g5453933_3p_at         | Hs.2407   | POU domain, class 2, associating factor 1                                              | POU2AF1  | 5.4 | 1.6 | 0.0332 |
| g4503670_3p_at         | Hs.61255  | fructose-1.6-bisphosphatase 2                                                          | FBP2     | 5.8 | 1.6 | 0.0381 |
| g12584207_3p_s_at      | Hs.307047 | resistin like beta                                                                     | RETNLB   | 6.8 | 1.6 | 0.0385 |
| Hs.22222.0.S2_3p_at    | Hs.410924 | hypothetical protein MGC10854                                                          | MGC10854 | 8.4 | 1.6 | 0.0087 |
| g5174630_3p_at         | Hs.433813 | tumor protein p53 inducible protein 11                                                 | TP53I11  | 6.2 | 1.6 | 0.0178 |
| Hs.55921.0.S1_3p_a_at  | Hs.171292 | glutamyl-prolyl-tRNA synthetase                                                        | EPRS     | 5.7 | 1.6 | 0.0305 |
| Hs.56966.1.S1_3p_a_at  | Hs.292119 | nucleoporin 210                                                                        | NUP210   | 6.3 | 1.6 | 0.0426 |
| g6631094_3p_at         | Hs.179565 | MCM3 minichromosome maintenance deficient 3 (S. cerevisiae)                            | MCM3     | 9.1 | 1.6 | 0.0343 |
| g12655140_3p_a_at      | Hs.405925 | differential display and activated by p53                                              | DDA3     | 7.5 | 1.6 | 0.0476 |
| g7019408_3p_at         | Hs.521171 | hypoxia-inducible protein 2                                                            | HIG2     | 8.0 | 1.5 | 0.0364 |
| g4503308_3p_at         | Hs.155597 | D component of complement (adipsin)                                                    | DF       | 7.8 | 1.5 | 0.0374 |
| Hs.238956.1.A1_3p_x_at | Hs.68714  | Splicing factor, arginine/serine-rich 1 (splicing factor 2, alternate splicing factor) | SFRS1    | 8.2 | 1.5 | 0.0053 |
| g7657117_3p_s_at       | Hs.54609  | glycine C-acetyltransferase (2-amino-3-ketobutyrate coenzyme A ligase)                 | GCAT     | 6.5 | 1.5 | 0.0206 |
| Hs.24790.0.S1_3p_a_at  | Hs.24790  | KIAA1573 protein                                                                       | KIAA1573 | 5.1 | 1.5 | 0.0239 |
| Hs.238956.1.A1_3p_at   | Hs.68714  | Splicing factor, arginine/serine-rich 1 (splicing factor 2, alternate splicing factor) | SFRS1    | 8.3 | 1.5 | 0.0411 |
| g13097236_3p_a_at      | Hs.505572 | hypothetical protein from clone 643                                                    | LOC57228 | 8.1 | 1.5 | 0.0397 |
| Hs.211506.0.S1_3p_x_at | Hs.511755 | pituitary tumor-transforming 2                                                         | PTTG2    | 4.2 | 1.5 | 0.0442 |
| g13376283_3p_at        | Hs.336866 | hypothetical protein FLJ12735                                                          | FLJ12735 | 5.3 | 1.5 | 0.0418 |
| g11056055_3p_a_at      | Hs.411125 | mitochondrial ribosomal protein S12                                                    | MRPS12   | 9.1 | 1.5 | 0.0491 |
| g8922608_3p_a_at       | Hs.467479 | ATPase family, AAA domain containing 3A                                                | ATAD3A   | 8.1 | 1.5 | 0.0212 |
| Hs.105509.1.S2_3p_at   | Hs.105509 | CTL2 gene                                                                              | CTL2     | 7.1 | 1.5 | 0.0385 |
| g12597646_3p_x_at      | Hs.139709 | hypothetical protein FLJ12572                                                          | FLJ12572 | 7.3 | 1.5 | 0.0483 |



|                        |           |                                                                                  |          |      |     |        |
|------------------------|-----------|----------------------------------------------------------------------------------|----------|------|-----|--------|
| Hs.271894.0.A1_3p_at   | Hs.446414 | CD47 antigen (Rh-related antigen. integrin-associated signal transducer)         | CD47     | 4.6  | 1.5 | 0.0430 |
| Hs.6385.0.S1_3p_at     | Hs.6385   | KIAA1277                                                                         | KIAA1277 | 8.1  | 1.5 | 0.0440 |
| g179364_3p_at          | Hs.371468 | cyclin D1 (PRAD1: parathyroid adenomatosis 1)                                    | CCND1    | 9.0  | 1.5 | 0.0429 |
| Hs.123122.1.S1_3p_at   | Hs.318398 | FSH primary response (LRPR1 homolog. rat) 1                                      | FSHPRH1  | 4.6  | 1.4 | 0.0431 |
| Hs2.376823.1.A1_3p_at  | Hs.458418 | KIAA1731 protein                                                                 | KIAA1731 | 5.7  | 1.4 | 0.0380 |
| Hs.114012.0.S1_3p_at   | Hs.437205 | ataxin 7-like 1                                                                  | ATXN7L1  | 7.8  | 1.4 | 0.0407 |
| Hs.178617.0.S2_3p_a_at | Hs.327631 | retinol dehydrogenase 13 (all-trans and 9-cis)                                   | RDH13    | 8.4  | 1.4 | 0.0376 |
| g4506636_3p_x_at       | Hs.250895 | ribosomal protein L34                                                            | RPL34    | 13.8 | 1.4 | 0.0478 |
| g3462508_3p_a_at       | ---       | ---                                                                              | ---      | 6.3  | 1.4 | 0.0476 |
| Hs2.367802.1.A1_3p_at  | Hs.406722 | chromosome 6 open reading frame 157                                              | C6orf157 | 3.9  | 1.4 | 0.0449 |
| g4757895_3p_at         | Hs.377010 | carbamoyl-phosphate synthetase 2. aspartate transcarbamylase. and dihydroorotase | CAD      | 7.1  | 1.4 | 0.0402 |
| Hs.62669.0.A1_3p_x_at  | Hs.355515 | hypothetical protein FLJ25059                                                    | FLJ25059 | 5.0  | 1.4 | 0.0385 |
| g5911930_3p_a_at       | Hs.278027 | LIM domain kinase 2                                                              | LIMK2    | 7.7  | 1.3 | 0.0474 |
| g7706546_3p_a_at       | Hs.440953 | chromosome 9 open reading frame 127                                              | C9orf127 | 8.0  | 1.3 | 0.0319 |
| Hs.30864.0.A1_3p_at    | ---       | ---                                                                              | ---      | 7.3  | 1.3 | 0.0408 |
| g8922715_3p_a_at       | Hs.17860  | oxoglutarate dehydrogenase-like                                                  | OGDHL    | 7.2  | 1.3 | 0.0347 |
| Hs.279789.5.A1_3p_x_at | Hs.410396 | isovaleryl Coenzyme A dehydrogenase                                              | IVD      | 8.4  | 1.3 | 0.0395 |
| Hs.34779.0.A1_3p_at    | ---       | ---                                                                              | ---      | 5.5  | 1.3 | 0.0294 |
