# Supplementary material
Source: PubMed Central journal article supplement (PMC1856251)
Supplement: gut_2005.073262_3.pdf [file gut_2005.073262_3.pdf]

| <b>X3P ID</b>           | <b>UniGene ID</b> | <b>Gene Title</b>                                                                                  | <b>Gene Symbol</b> | <b>A</b> | <b>M</b> | <b><i>p</i>-<i>fd</i>r</b> |
|-------------------------|-------------------|----------------------------------------------------------------------------------------------------|--------------------|----------|----------|----------------------------|
| Hs.326557.0.S1_3p_s_at  | Hs.264750         | ectonucleotide pyrophosphatase/phosphodiesterase 3                                                 | ENPP3              | 8.3      | 26.1     | 0.001                      |
| g4557322_3p_at          | Hs.534305         | apolipoprotein C-III                                                                               | APOC3              | 10.9     | 16.8     | 0.003                      |
| g4758153_3p_a_at        | Hs.304365         | deafness. autosomal dominant 5                                                                     | DFNA5              | 8.7      | 15.7     | 0.012                      |
| Hs.26691.1.S1_3p_at     | ---               | ---                                                                                                | ---                | 8.2      | 13.5     | 0.009                      |
| Hs2.343553.2.S1_3p_at   | Hs.534621         | similar to RIKEN cDNA 1110002C08 gene                                                              | MGC9564            | 9.9      | 12.7     | 0.013                      |
| g189084_3p_at           | Hs.466814         | carcinoembryonic antigen-related cell adhesion molecule 6 (non-specific cross reacting antigen)    | CEACAM6            | 10.1     | 12.5     | 0.011                      |
| g8051574_3p_a_at        | Hs.369055         | ATP-binding cassette. sub-family G (WHITE). member 1                                               | ABCG1              | 8.3      | 12.3     | 0.029                      |
| g4503144_3p_a_at        | Hs.1355           | cathepsin E                                                                                        | CTSE               | 10.3     | 12.2     | 0.048                      |
| g13477106_3p_s_at       | Hs.466814         | carcinoembryonic antigen-related cell adhesion molecule 6 (non-specific cross reacting antigen)    | CEACAM6            | 7.9      | 11.4     | 0.016                      |
| g4557320_3p_a_at        | Hs.93194          | apolipoprotein A-I                                                                                 | APOA1              | 12.3     | 10.1     | 0.021                      |
| Hs.43577.0.S1_3p_at     | Hs.43577          | ATPase. Class I. type 8B. member 2                                                                 | ATP8B2             | 7.8      | 9.9      | 0.035                      |
| g6996012_3p_at          | Hs.90708          | granzyme A (granzyme 1. cytotoxic T-lymphocyte-associated serine esterase 3)                       | GZMA               | 9.3      | 9.1      | 0.006                      |
| g4505792_3p_a_at        | Hs.297681         | serine (or cysteine) proteinase inhibitor. clade A (alpha-1 antiproteinase. antitrypsin). member 1 | SERPINA1           | 9.8      | 7.7      | 0.002                      |
| Hs2.343553.1.S2_3p_a_at | Hs.534621         | similar to RIKEN cDNA 1110002C08 gene                                                              | MGC9564            | 9.6      | 7.7      | 0.020                      |
| g4504664_3p_at          | Hs.75596          | interleukin 2 receptor. beta                                                                       | IL2RB              | 8.2      | 7.4      | 0.017                      |
| 222938_3p_x_at          | Hs.264750         | ectonucleotide pyrophosphatase/phosphodiesterase 3                                                 | ENPP3              | 9.0      | 7.0      | 0.000                      |
| Hs.73849.1.A1_3p_at     | ---               | ---                                                                                                | ---                | 8.1      | 6.6      | 0.002                      |
| Hs.21351.0.A1_3p_at     | Hs.379930         | MAX dimerization protein 1                                                                         | MAD                | 8.3      | 6.6      | 0.033                      |
| g4759113_3p_at          | Hs.351306         | solute carrier family 16 (monocarboxylic acid transporters). member 4                              | SLC16A4            | 7.5      | 6.4      | 0.039                      |
| g181183_3p_a_at         | Hs.439776         | stomatin                                                                                           | STOM               | 9.3      | 6.3      | 0.010                      |
| g13241283_3p_s_at       | Hs.336429         | GABA(A) receptor-associated protein like 1                                                         | GABARAPL1          | 8.5      | 6.1      | 0.006                      |
| g13376573_3p_at         | Hs.287702         | hypothetical protein FLJ22595                                                                      | FLJ22595           | 9.3      | 6.1      | 0.025                      |

|                         |           |                                                                                                              |           |      |     |       |
|-------------------------|-----------|--------------------------------------------------------------------------------------------------------------|-----------|------|-----|-------|
| g13375570_3p_a_at       | Hs.336429 | GABA(A) receptor-associated protein like 1                                                                   | GABARAPL1 | 9.4  | 6.1 | 0.002 |
| Hs.21858.2.A1_3p_at     | Hs.21858  | serine (or cysteine) proteinase inhibitor, clade E (nexin, plasminogen activator inhibitor type 1), member 2 | SERPINE2  | 7.6  | 5.8 | 0.040 |
| g6857799_3p_at          | Hs.105434 | interferon stimulated gene 20kDa                                                                             | ISG20     | 8.7  | 5.8 | 0.005 |
| g5730074_3p_at          | Hs.351808 | fibrinogen-like 2                                                                                            | FGL2      | 8.9  | 5.7 | 0.036 |
| g4557710_3p_a_at        | Hs.83450  | laminin, alpha 3                                                                                             | LAMA3     | 8.9  | 5.7 | 0.004 |
| Hs.23016.0.S1_3p_at     | Hs.231853 | chemokine orphan receptor 1                                                                                  | CMKOR1    | 7.9  | 5.7 | 0.005 |
| g4507016_3p_at          | Hs.24030  | solute carrier family 31 (copper transporters), member 2                                                     | SLC31A2   | 8.0  | 5.7 | 0.024 |
| g13435385_3p_at         | Hs.442527 | cytochrome P450, family 3, subfamily A, polypeptide 4                                                        | CYP3A4    | 11.0 | 5.6 | 0.012 |
| g6470134_3p_s_at        | Hs.442527 | cytochrome P450, family 3, subfamily A, polypeptide 4                                                        | CYP3A4    | 11.1 | 5.5 | 0.006 |
| Hs.11169.2.S2_3p_at     | Hs.11169  | mitogen-inducible gene 6                                                                                     | MIG-6     | 9.3  | 5.5 | 0.033 |
| Hs.264750.0.A1_3p_s_at  | Hs.264750 | ectonucleotide pyrophosphatase/phosphodiesterase 3                                                           | ENPP3     | 8.3  | 5.5 | 0.001 |
| Hs.5940.0.A1_3p_a_at    | Hs.5940   | mucin 13, epithelial transmembrane                                                                           | MUC13     | 8.3  | 5.4 | 0.042 |
| Hs.150164.0.A1_3p_at    | ---       | ---                                                                                                          | ---       | 7.6  | 5.4 | 0.003 |
| g623041_3p_at           | Hs.97087  | CD3Z antigen, zeta polypeptide (TIT3 complex)                                                                | CD3Z      | 7.2  | 5.3 | 0.033 |
| g8922199_3p_s_at        | Hs.128738 | absent in melanoma 1-like                                                                                    | AIM1L     | 7.5  | 5.3 | 0.000 |
| Hs2.343553.1.S1_3p_a_at | Hs.534621 | similar to RIKEN cDNA 1110002C08 gene                                                                        | MGC9564   | 8.2  | 5.2 | 0.028 |
| g9506666_3p_at          | Hs.512618 | ras homolog gene family, member F (in filopodia)                                                             | RHOF      | 8.7  | 5.2 | 0.002 |
| g5901909_3p_at          | Hs.81743  | CD160 antigen                                                                                                | CD160     | 8.0  | 5.1 | 0.033 |
| g13787191_3p_at         | Hs.37009  | alkaline phosphatase, intestinal                                                                             | ALPI      | 10.2 | 5.0 | 0.001 |
| g6912363_3p_at          | Hs.132753 | F-box protein 2                                                                                              | FBXO2     | 7.2  | 4.9 | 0.021 |
| g13787191_3p_x_at       | Hs.37009  | alkaline phosphatase, intestinal                                                                             | ALPI      | 10.2 | 4.9 | 0.001 |
| g4501944_3p_at          | Hs.441047 | adrenomedullin                                                                                               | ADM       | 8.0  | 4.9 | 0.024 |
| g5174773_3p_x_at        | Hs.1247   | apolipoprotein A-IV                                                                                          | APOA4     | 13.0 | 4.9 | 0.002 |
| g5174550_3p_at          | Hs.194777 | mepirin A, beta                                                                                              | MEP1B     | 11.9 | 4.8 | 0.011 |
| Hs.326779.0.A1_3p_s_at  | ---       | ---                                                                                                          | ---       | 10.2 | 4.7 | 0.016 |
| g4557544_3p_a_at        | Hs.1408   | endothelin 3                                                                                                 | EDN3      | 9.6  | 4.7 | 0.014 |
| g12056470_3p_at         | Hs.194691 | retinoic acid induced 3                                                                                      | RAI3      | 8.9  | 4.6 | 0.012 |
| Hs.21364.0.A1_3p_at     | ---       | ---                                                                                                          | ---       | 7.3  | 4.5 | 0.042 |

|                        |           |                                                                                                     |          |      |     |       |
|------------------------|-----------|-----------------------------------------------------------------------------------------------------|----------|------|-----|-------|
| g4759111_3p_s_at       | Hs.386678 | solute carrier family 16 (monocarboxylic acid transporters). member 3                               | SLC16A3  | 8.3  | 4.5 | 0.032 |
| g7705707_3p_at         | Hs.113019 | fls485                                                                                              | LOC51066 | 8.0  | 4.4 | 0.041 |
| g4557358_3p_at         | Hs.513489 | bradykinin receptor B2                                                                              | BDKRB2   | 7.6  | 4.4 | 0.005 |
| g4758379_3p_a_at       | Hs.306834 | FK506 binding protein 1B. 12.6 kDa                                                                  | FKBP1B   | 9.8  | 4.4 | 0.033 |
| g510702_3p_at          | Hs.436983 | laminin. beta 3                                                                                     | LAMB3    | 8.5  | 4.4 | 0.005 |
| 220289_3p_s_at         | Hs.128738 | absent in melanoma 1-like                                                                           | AIM1L    | 7.6  | 4.4 | 0.000 |
| g12862475_3p_at        | Hs.76507  | lipopolysaccharide-induced TNF factor                                                               | LITAF    | 8.9  | 4.4 | 0.037 |
| g186929_3p_a_at        | Hs.232432 | lysosomal-associated membrane protein 2                                                             | LAMP2    | 8.4  | 4.4 | 0.031 |
| g6857799_3p_s_at       | Hs.105434 | interferon stimulated gene 20kDa                                                                    | ISG20    | 9.3  | 4.3 | 0.002 |
| g5478215_3p_x_at       | ---       | major histocompatibility complex. class II. DR beta 1                                               | HLA-DRB1 | 10.6 | 4.3 | 0.040 |
| g4758899_3p_a_at       | Hs.195471 | 6-phosphofructo-2-kinase/fructose-2,6-biphosphatase 3                                               | PFKFB3   | 9.4  | 4.3 | 0.022 |
| g7705770_3p_at         | Hs.19385  | abhydrolase domain containing 5                                                                     | ABHD5    | 7.8  | 4.3 | 0.016 |
| g12061050_3p_a_at      | Hs.110571 | growth arrest and DNA-damage-inducible. beta                                                        | GADD45B  | 8.2  | 4.3 | 0.008 |
| Hs.279930.1.S1_3p_x_at | ---       | major histocompatibility complex. class II. DR beta 1                                               | HLA-DRB1 | 10.0 | 4.3 | 0.041 |
| g12803628_3p_at        | Hs.7644   | histone 1. H1c                                                                                      | HIST1H1C | 6.4  | 4.3 | 0.021 |
| Hs.280892.0.S1_3p_at   | Hs.280892 | Hypothetical gene supported by AK026416                                                             | ---      | 9.4  | 4.2 | 0.017 |
| g11386202_3p_a_at      | Hs.370771 | cyclin-dependent kinase inhibitor 1A (p21. Cip1)                                                    | CDKN1A   | 10.7 | 4.2 | 0.006 |
| Hs.110341.0.A2_3p_at   | Hs.212787 | KIAA0303 protein                                                                                    | KIAA0303 | 6.4  | 4.1 | 0.032 |
| g5174773_3p_at         | Hs.1247   | apolipoprotein A-IV                                                                                 | APOA4    | 13.2 | 4.1 | 0.002 |
| g8393364_3p_at         | Hs.212172 | beta-carotene 15.15'-monooxygenase 1                                                                | BCMO1    | 7.0  | 4.1 | 0.028 |
| Hs.167529.3.S1_3p_a_at | Hs.418127 | cytochrome P450. family 2. subfamily C. polypeptide 9                                               | CYP2C9   | 10.5 | 4.1 | 0.024 |
| g4507450_3p_at         | Hs.350470 | trefoil factor 1 (breast cancer. estrogen-inducible sequence expressed in)                          | TFF1     | 8.8  | 4.1 | 0.034 |
| g8051580_3p_a_at       | Hs.5057   | carboxypeptidase D                                                                                  | CPD      | 7.7  | 4.0 | 0.031 |
| Hs.44021.0.S1_3p_at    | Hs.386140 | Bcl2 modifying factor                                                                               | BMF      | 8.0  | 4.0 | 0.005 |
| Hs.119663.0.S1_3p_a_at | Hs.278573 | CD59 antigen p18-20 (antigen identified by monoclonal antibodies 16.3A5. EJ16. EJ30. EL32 and G344) | CD59     | 8.4  | 4.0 | 0.044 |

|                        |           |                                                                                                                |                           |      |     |       |
|------------------------|-----------|----------------------------------------------------------------------------------------------------------------|---------------------------|------|-----|-------|
| g11545806_3p_at        | Hs.375023 | cell death-inducing DFFA-like effector c                                                                       | CIDEc                     | 11.1 | 4.0 | 0.024 |
| Hs.17998.0.S1_3p_at    | ---       | ---                                                                                                            | ---                       | 9.2  | 4.0 | 0.044 |
| g4504436_3p_at         | Hs.202833 | heme oxygenase (decycling) 1                                                                                   | HMOX1                     | 9.9  | 4.0 | 0.012 |
| g4758683_3p_at         | Hs.481028 | lecithin retinol acyltransferase (phosphatidylcholine--retinol O-acyltransferase)                              | LRAT                      | 5.1  | 3.9 | 0.011 |
| Hs.184367.0.S2_3p_at   | Hs.534502 | HSPC047 protein /// RAS p21 protein activator 4                                                                | HSPC047 /// RASA4         | 7.4  | 3.9 | 0.044 |
| g8923525_3p_x_at       | Hs.272805 | HRAS-like suppressor 2                                                                                         | HRASLS2                   | 11.0 | 3.9 | 0.016 |
| 220017_3p_x_at         | Hs.418127 | cytochrome P450, family 2, subfamily C, polypeptide 9                                                          | CYP2C9                    | 10.8 | 3.9 | 0.046 |
| g8923121_3p_s_at       | Hs.4205   | protocadherin LKC                                                                                              | PC-LKC                    | 9.9  | 3.9 | 0.005 |
| 213716_3p_s_at         | Hs.95655  | secreted and transmembrane 1                                                                                   | SECTM1                    | 8.9  | 3.8 | 0.003 |
| g181569_3p_a_at        | Hs.44926  | dipeptidylpeptidase 4 (CD26, adenosine deaminase complexing protein 2)                                         | DPP4                      | 9.5  | 3.8 | 0.014 |
| g8923525_3p_at         | Hs.272805 | HRAS-like suppressor 2                                                                                         | HRASLS2                   | 11.0 | 3.8 | 0.018 |
| Hs.84063.0.S1_3p_at    | Hs.84063  | BCL2-like 11 (apoptosis facilitator)                                                                           | BCL2L11                   | 7.6  | 3.8 | 0.033 |
| Hs.271819.0.S1_3p_at   | Hs.271819 | mucin 17                                                                                                       | MUC17                     | 10.8 | 3.8 | 0.032 |
| 214421_3p_x_at         | Hs.418127 | cytochrome P450, family 2, subfamily C, polypeptide 9                                                          | CYP2C9                    | 10.0 | 3.8 | 0.043 |
| g5921993_3p_at         | Hs.560    | apolipoprotein B mRNA editing enzyme, catalytic polypeptide 1                                                  | APOBEC1                   | 10.9 | 3.8 | 0.024 |
| g4827007_3p_at         | Hs.489180 | solute carrier family 15 (oligopeptide transporter), member 1                                                  | SLC15A1                   | 10.9 | 3.7 | 0.009 |
| 216025_3p_x_at         | ---       | ---                                                                                                            | ---                       | 10.5 | 3.7 | 0.038 |
| g11545786_3p_a_at      | Hs.443906 | egl nine homolog 3 (C. elegans)                                                                                | EGLN3                     | 7.5  | 3.7 | 0.018 |
| g188469_3p_at          | Hs.446471 | CD74 antigen (invariant polypeptide of major histocompatibility complex, class II antigen-associated)          | CD74                      | 11.3 | 3.7 | 0.023 |
| g8922813_3p_at         | Hs.120946 | hypothetical protein FLJ11000                                                                                  | FLJ11000                  | 8.0  | 3.6 | 0.013 |
| g9845492_3p_s_at       | Hs.458453 | gamma-glutamyltransferase-like 4 /// gamma-glutamyltransferase 1 /// gamma-glutamyltransferase-like activity 4 | GGTL4 /// GGT1 /// GGTLA4 | 7.2  | 3.6 | 0.024 |
| 212221_3p_x_at         | Hs.522169 | iduronate 2-sulfatase (Hunter syndrome)                                                                        | IDS                       | 9.4  | 3.6 | 0.047 |
| g13259502_3p_at        | Hs.427055 | nuclear receptor subfamily 0, group B, member 2                                                                | NR0B2                     | 9.8  | 3.6 | 0.006 |
| Hs.167529.2.S1_3p_x_at | ---       | ---                                                                                                            | ---                       | 11.5 | 3.6 | 0.034 |
| g4506324_3p_at         | Hs.198288 | protein tyrosine phosphatase, receptor type, R                                                                 | PTPRR                     | 7.1  | 3.6 | 0.010 |

|                        |           |                                                                                                                                                                                                                                                                                                                                                                                                                                                                                                                                              |                                                                                                                |      |     |       |
|------------------------|-----------|----------------------------------------------------------------------------------------------------------------------------------------------------------------------------------------------------------------------------------------------------------------------------------------------------------------------------------------------------------------------------------------------------------------------------------------------------------------------------------------------------------------------------------------------|----------------------------------------------------------------------------------------------------------------|------|-----|-------|
| g306748_3p_s_at        | Hs.458453 | gamma-glutamyltransferase-like 4 ///<br>gamma-glutamyltransferase 1 ///<br>gamma-glutamyltransferase-like<br>activity 4                                                                                                                                                                                                                                                                                                                                                                                                                      | GGTL4 /// GGT1 ///<br>GGTLA4                                                                                   | 7.3  | 3.6 | 0.039 |
| g7657042_3p_a_at       | Hs.282326 | Down syndrome critical region gene 1                                                                                                                                                                                                                                                                                                                                                                                                                                                                                                         | DSCR1                                                                                                          | 8.6  | 3.6 | 0.030 |
| 208306_3p_x_at         | Hs.520049 | Major histocompatibility complex.<br>class II. DR beta 4                                                                                                                                                                                                                                                                                                                                                                                                                                                                                     | HLA-DRB3                                                                                                       | 11.0 | 3.6 | 0.041 |
| Hs.133083.0.S1_3p_at   | Hs.405755 | dihydrodiol dehydrogenase (dimeric)                                                                                                                                                                                                                                                                                                                                                                                                                                                                                                          | DHDH                                                                                                           | 9.2  | 3.5 | 0.042 |
| Hs.13377.0.S1_3p_at    | Hs.464526 | abhydrolase domain containing 3                                                                                                                                                                                                                                                                                                                                                                                                                                                                                                              | ABHD3                                                                                                          | 10.3 | 3.5 | 0.029 |
| g13477232_3p_at        | Hs.389311 | hypothetical protein MGC13057                                                                                                                                                                                                                                                                                                                                                                                                                                                                                                                | MGC13057                                                                                                       | 10.7 | 3.5 | 0.024 |
| g13699817_3p_x_at      | Hs.418127 | cytochrome P450. family 2. subfamily<br>C. polypeptide 9                                                                                                                                                                                                                                                                                                                                                                                                                                                                                     | CYP2C9                                                                                                         | 11.9 | 3.5 | 0.031 |
| g4507530_3p_at         | Hs.29499  | toll-like receptor 3                                                                                                                                                                                                                                                                                                                                                                                                                                                                                                                         | TLR3                                                                                                           | 8.2  | 3.5 | 0.013 |
| g4503722_3p_a_at       | Hs.8302   | four and a half LIM domains 2                                                                                                                                                                                                                                                                                                                                                                                                                                                                                                                | FHL2                                                                                                           | 9.7  | 3.5 | 0.039 |
| g4507538_3p_at         | Hs.184194 | transmembrane 4 superfamily<br>member 5                                                                                                                                                                                                                                                                                                                                                                                                                                                                                                      | TM4SF5                                                                                                         | 11.5 | 3.5 | 0.008 |
| g188469_3p_x_at        | Hs.446471 | CD74 antigen (invariant polypeptide<br>of major histocompatibility complex.<br>class II antigen-associated)                                                                                                                                                                                                                                                                                                                                                                                                                                  | CD74                                                                                                           | 11.4 | 3.4 | 0.024 |
| Hs.2056.1.S1_3p_s_at   | Hs.124112 | UDP glycosyltransferase 1 family.<br>polypeptide A3 /// UDP<br>glycosyltransferase 1 family.<br>polypeptide A6 /// UDP<br>glycosyltransferase 1 family.<br>polypeptide A1 /// UDP<br>glycosyltransferase 1 family.<br>polypeptide A10 /// UDP<br>glycosyltransferase 1 family.<br>polypeptide A7 /// UDP<br>glycosyltransferase 1 family.<br>polypeptide A5 /// UDP<br>glycosyltransferase 1 family.<br>polypeptide A8 /// UDP<br>glycosyltransferase 1 family.<br>polypeptide A9 /// UDP<br>glycosyltransferase 1 family.<br>polypeptide A4 | UGT1A3 /// UGT1A6<br>/// UGT1A1 ///<br>UGT1A10 ///<br>UGT1A7 /// UGT1A5<br>/// UGT1A8 ///<br>UGT1A9 /// UGT1A4 | 10.9 | 3.4 | 0.036 |
| Hs.289098.0.S1_3p_x_at | Hs.458453 | gamma-glutamyltransferase-like 4 ///<br>gamma-glutamyltransferase 1 ///<br>gamma-glutamyltransferase-like<br>activity 4                                                                                                                                                                                                                                                                                                                                                                                                                      | GGTL4 /// GGT1 ///<br>GGTLA4                                                                                   | 8.5  | 3.4 | 0.034 |
| g8051633_3p_at         | Hs.17466  | retinoic acid receptor responder<br>(tazarotene induced) 3                                                                                                                                                                                                                                                                                                                                                                                                                                                                                   | RARRES3                                                                                                        | 9.8  | 3.4 | 0.031 |
| g13699817_3p_a_at      | Hs.418127 | cytochrome P450. family 2. subfamily<br>C. polypeptide 9                                                                                                                                                                                                                                                                                                                                                                                                                                                                                     | CYP2C9                                                                                                         | 11.5 | 3.4 | 0.033 |

|                        |           |                                                                                  |                |      |     |       |
|------------------------|-----------|----------------------------------------------------------------------------------|----------------|------|-----|-------|
| g10880125_3p_a_at      | Hs.57922  | X-prolyl aminopeptidase (aminopeptidase P) 2. membrane-bound                     | XPNPEP2        | 11.5 | 3.4 | 0.039 |
| g12240160_3p_a_at      | Hs.49753  | uveal autoantigen with coiled-coil domains and ankyrin repeats                   | UACA           | 8.0  | 3.4 | 0.039 |
| g4502404_3p_x_at       | Hs.512682 | carcinoembryonic antigen-related cell adhesion molecule 1 (biliary glycoprotein) | CEACAM1        | 8.2  | 3.4 | 0.009 |
| Hs.95898.0.S1_3p_at    | ---       | ---                                                                              | ---            | 8.6  | 3.4 | 0.005 |
| g13376256_3p_a_at      | Hs.31297  | cytochrome b reductase 1                                                         | CYBRD1         | 9.9  | 3.3 | 0.014 |
| Hs.167529.2.S1_3p_a_at | Hs.418127 | cytochrome P450. family 2. subfamily C. polypeptide 9                            | CYP2C9         | 11.5 | 3.3 | 0.035 |
| g13699814_3p_s_at      | Hs.1360   | cytochrome P450. family 2. subfamily B. polypeptide 6                            | CYP2B6         | 9.9  | 3.3 | 0.018 |
| g5032096_3p_at         | Hs.388375 | solute carrier family 6 (neurotransmitter transporter. creatine). member 8       | SLC6A8         | 9.9  | 3.3 | 0.032 |
| Hs.83883.0.S2_3p_at    | Hs.83883  | transmembrane. prostate androgen induced RNA                                     | TMEPAI         | 7.3  | 3.3 | 0.020 |
| g9961350_3p_at         | Hs.361463 | coagulation factor X                                                             | F10            | 8.4  | 3.3 | 0.025 |
| Hs.167529.1.S1_3p_a_at | Hs.418127 | cytochrome P450. family 2. subfamily C. polypeptide 9                            | CYP2C9         | 11.5 | 3.3 | 0.033 |
| Hs.20196.0.S2_3p_at    | Hs.20196  | adenylate cyclase 9                                                              | ADCY9          | 9.1  | 3.3 | 0.045 |
| g8922531_3p_at         | Hs.23025  | hypothetical protein FLJ10579                                                    | FLJ10579       | 9.5  | 3.3 | 0.010 |
| 4855867C_3p_at         | Hs.234642 | aquaporin 3                                                                      | AQP3           | 12.2 | 3.3 | 0.039 |
| g6006024_3p_at         | Hs.422215 | membrane protein. palmitoylated 1. 55kDa                                         | MPP1           | 9.6  | 3.3 | 0.033 |
| Hs.2014.2.S1_3p_a_at   | Hs.2014   | T cell receptor delta diversity 3 /// T cell receptor delta locus                | TRDD3 /// TRD@ | 7.5  | 3.3 | 0.039 |
| Hs.234234.0.S2_3p_at   | Hs.315235 | aldolase B. fructose-bisphosphate                                                | ALDOB          | 10.8 | 3.2 | 0.046 |
| g4502152_3p_a_at       | Hs.280226 | apolipoprotein B (including Ag(x) antigen)                                       | APOB           | 12.8 | 3.2 | 0.021 |
| Hs.69388.1.S1_3p_at    | Hs.69388  | chromosome 6 open reading frame 145                                              | C6orf145       | 10.0 | 3.2 | 0.006 |
| g4507728_3p_at         | Hs.512712 | tubulin. beta polypeptide                                                        | TUBB           | 9.8  | 3.1 | 0.023 |
| g4501900_3p_at         | Hs.334707 | aminoacylase 1                                                                   | ACY1           | 10.1 | 3.1 | 0.014 |
| g12082808_3p_a_at      | Hs.308638 | cytochrome P450. family 3. subfamily A. polypeptide 7                            | CYP3A7         | 5.9  | 3.1 | 0.016 |
| Hs.16732.0.A1_3p_at    | ---       | ---                                                                              | ---            | 6.2  | 3.1 | 0.044 |
| Hs.285976.2.S1_3p_a_at | Hs.285976 | LAG1 longevity assurance homolog 2 (S. cerevisiae)                               | LASS2          | 10.8 | 3.1 | 0.006 |
| Hs.191034.0.A1_3p_at   | ---       | ---                                                                              | ---            | 9.8  | 3.1 | 0.039 |
| g10947055_3p_a_at      | Hs.440478 | ankyrin 3. node of Ranvier (ankyrin G)                                           | ANK3           | 10.9 | 3.1 | 0.049 |

|                         |           |                                                                                  |           |      |     |       |
|-------------------------|-----------|----------------------------------------------------------------------------------|-----------|------|-----|-------|
| Hs.16950.0.S1_3p_at     | Hs.517761 | KIAA0342 gene product                                                            | KIAA0342  | 8.0  | 3.1 | 0.033 |
| Hs.30213.0.S1_3p_a_at   | Hs.30213  | ceroid-lipofuscinosis. neuronal 5                                                | CLN5      | 7.9  | 3.1 | 0.029 |
| g4885066_3p_s_at        | Hs.179735 | ras homolog gene family. member C                                                | RHOC      | 10.9 | 3.1 | 0.021 |
| g12803250_3p_at         | Hs.90753  | HIV-1 Tat interactive protein 2. 30kDa                                           | HTATIP2   | 11.3 | 3.1 | 0.018 |
| g4504956_3p_at          | Hs.232432 | lysosomal-associated membrane protein 2                                          | LAMP2     | 8.5  | 3.1 | 0.004 |
| g13376165_3p_at         | Hs.156652 | hypothetical protein FLJ22800                                                    | FLJ22800  | 12.2 | 3.1 | 0.050 |
| g10835152_3p_x_at       | Hs.528402 | interleukin 15                                                                   | IL15      | 6.3  | 3.0 | 0.040 |
| Hs.91109.0.A1_3p_at     | Hs.91109  | hypothetical protein LOC222171                                                   | LOC222171 | 8.5  | 3.0 | 0.043 |
| g4502404_3p_a_at        | Hs.512682 | carcinoembryonic antigen-related cell adhesion molecule 1 (biliary glycoprotein) | CEACAM1   | 9.3  | 3.0 | 0.005 |
| Hs.264915.0.S2_3p_at    | ---       | ---                                                                              | ---       | 8.8  | 3.0 | 0.042 |
| g13375833_3p_at         | Hs.434247 | hypothetical protein FLJ23186                                                    | FLJ23186  | 6.0  | 3.0 | 0.032 |
| g179723_3p_at           | Hs.1285   | complement component 8. gamma polypeptide                                        | C8G       | 7.7  | 3.0 | 0.013 |
| g7706171_3p_at          | Hs.159651 | tumor necrosis factor receptor superfamily. member 21                            | TNFRSF21  | 9.2  | 3.0 | 0.029 |
| g11225608_3p_a_at       | Hs.178098 | angiotensin I converting enzyme (peptidyl-dipeptidase A) 2                       | ACE2      | 12.3 | 3.0 | 0.012 |
| g7669480_3p_at          | Hs.60389  | BCL2/adenovirus E1B 19kDa interacting protein 3                                  | BNIP3     | 7.7  | 3.0 | 0.038 |
| g4759051_3p_at          | Hs.510225 | ribosomal protein S6 kinase. 90kDa. polypeptide 5                                | RPS6KA5   | 5.9  | 3.0 | 0.037 |
| Hs2.337588.1.S1_3p_a_at | Hs.337588 | liver-expressed antimicrobial peptide 2                                          | LEAP-2    | 8.8  | 3.0 | 0.021 |
| g4507144_3p_a_at        | Hs.267812 | sorting nexin 4                                                                  | SNX4      | 7.7  | 3.0 | 0.024 |
| g5442445_3p_a_at        | Hs.28988  | glutaredoxin (thioltransferase)                                                  | GLRX      | 8.7  | 3.0 | 0.042 |
| Hs.104114.0.S1_3p_s_at  | Hs.493275 | tripartite motif-containing 31                                                   | TRIM31    | 8.3  | 3.0 | 0.024 |
| g9790904_3p_at          | Hs.80409  | growth arrest and DNA-damage-inducible. alpha                                    | GADD45A   | 9.6  | 2.9 | 0.023 |
| Hs.296259.0.S1_3p_at    | Hs.440967 | paraoxonase 3                                                                    | PON3      | 7.8  | 2.9 | 0.024 |
| g4501850_3p_a_at        | Hs.437420 | amiloride binding protein 1 (amine oxidase (copper-containing))                  | ABP1      | 10.4 | 2.9 | 0.036 |
| g4507054_3p_a_at        | Hs.194693 | solute carrier family 7 (cationic amino acid transporter. y+ system). member 7   | SLC7A7    | 11.7 | 2.9 | 0.009 |
| g13376180_3p_at         | Hs.163079 | tubulin. alpha-like 3                                                            | TUBAL3    | 9.6  | 2.9 | 0.037 |
| 209728_3p_at            | Hs.534337 | major histocompatibility complex. class II. DR beta 4                            | HLA-DRB4  | 8.2  | 2.9 | 0.042 |
| Hs.310525.0.S1_3p_at    | ---       | ---                                                                              | ---       | 7.0  | 2.9 | 0.016 |

|                        |           |                                                                             |          |      |     |       |
|------------------------|-----------|-----------------------------------------------------------------------------|----------|------|-----|-------|
| Hs.264750.0.A1_3p_a_at | Hs.264750 | ectonucleotide pyrophosphatase/phosphodiesterase 3                          | ENPP3    | 6.1  | 2.9 | 0.019 |
| Hs.12942.0.S2_3p_at    | Hs.12942  | SEC22 vesicle trafficking protein-like 3 ( <i>S. cerevisiae</i> )           | SEC22L3  | 10.3 | 2.9 | 0.032 |
| g13569890_3p_s_at      | Hs.133988 | Hypothetical gene supported by BC012394; BC053611                           | ---      | 9.4  | 2.9 | 0.046 |
| Hs.5672.0.S2_3p_at     | Hs.5672   | golgi membrane protein SB140                                                | SMAP-5   | 9.7  | 2.9 | 0.021 |
| g5032094_3p_at         | Hs.83974  | solute carrier organic anion transporter family, member 2A1                 | SLCO2A1  | 7.0  | 2.8 | 0.009 |
| g5453735_3p_a_at       | Hs.134859 | v-maf musculoaponeurotic fibrosarcoma oncogene homolog (avian)              | MAF      | 8.4  | 2.8 | 0.037 |
| Hs.77522.1.S1_3p_a_at  | Hs.351279 | major histocompatibility complex, class II, DM alpha                        | HLA-DMA  | 9.9  | 2.8 | 0.048 |
| Hs.90291.1.S1_3p_a_at  | Hs.439726 | laminin, beta 2 (laminin S)                                                 | LAMB2    | 6.5  | 2.8 | 0.049 |
| g4503228_3p_s_at       | Hs.442527 | cytochrome P450, family 3, subfamily A, polypeptide 4                       | CYP3A4   | 12.6 | 2.8 | 0.015 |
| Hs.95835.0.A1_3p_at    | Hs.95835  | OCIA domain containing 2                                                    | OCIAD2   | 9.3  | 2.8 | 0.026 |
| Hs.184598.0.S1_3p_at   | Hs.335798 | rhophilin, Rho GTPase binding protein 2                                     | RHPN2    | 9.8  | 2.8 | 0.014 |
| g5453735_3p_at         | Hs.134859 | v-maf musculoaponeurotic fibrosarcoma oncogene homolog (avian)              | MAF      | 10.6 | 2.8 | 0.039 |
| g885925_3p_at          | ---       | NADH dehydrogenase 5                                                        | MTND5    | 12.2 | 2.8 | 0.021 |
| g5729841_3p_at         | Hs.268849 | glyoxalase I                                                                | GLO1     | 11.8 | 2.8 | 0.012 |
| Hs.108169.0.S1_3p_at   | Hs.370774 | ankyrin repeat and BTB (POZ) domain containing 2                            | ABTB2    | 8.8  | 2.7 | 0.036 |
| Hs.26216.0.S1_3p_at    | ---       | ---                                                                         | ---      | 10.8 | 2.7 | 0.029 |
| Hs.267566.0.S1_3p_a_at | Hs.267566 | chromosome 14 open reading frame 58                                         | C14orf58 | 8.6  | 2.7 | 0.015 |
| g9961350_3p_x_at       | Hs.361463 | coagulation factor X                                                        | F10      | 8.5  | 2.7 | 0.018 |
| g2460168_3p_at         | Hs.437606 | HMG-box transcription factor 1                                              | HBP1     | 9.3  | 2.7 | 0.044 |
| g8922761_3p_at         | Hs.502773 | membrane-type 1 matrix metalloproteinase cytoplasmic tail binding protein-1 | MTCBP-1  | 10.5 | 2.7 | 0.023 |
| g4507030_3p_at         | Hs.1964   | solute carrier family 5 (sodium/glucose cotransporter), member 1            | SLC5A1   | 11.1 | 2.7 | 0.047 |
| g4503366_3p_at         | Hs.44926  | dipeptidylpeptidase 4 (CD26, adenosine deaminase complexing protein 2)      | DPP4     | 11.5 | 2.7 | 0.048 |
| g5031908_3p_at         | Hs.179704 | meprin A, alpha (PABA peptide hydrolase)                                    | MEP1A    | 11.9 | 2.7 | 0.040 |



|                        |           |                                                                                                |           |      |     |       |
|------------------------|-----------|------------------------------------------------------------------------------------------------|-----------|------|-----|-------|
| g13376444_3p_x_at      | Hs.390817 | myosin XVB. pseudogene                                                                         | MYO15B    | 9.3  | 2.7 | 0.037 |
| Hs.29002.0.S2_3p_at    | Hs.412318 | KIAA1706 protein                                                                               | KIAA1706  | 8.6  | 2.7 | 0.037 |
| g13027587_3p_at        | Hs.28368  | low density lipoprotein receptor-related protein 10                                            | LRP10     | 10.4 | 2.7 | 0.022 |
| g2645728_3p_a_at       | Hs.35052  | testis enhanced gene transcript (BAX inhibitor 1)                                              | TEGT      | 11.4 | 2.7 | 0.004 |
| g5174516_3p_at         | Hs.370849 | SMAD. mothers against DPP homolog 7 (Drosophila)                                               | SMAD7     | 6.4  | 2.6 | 0.042 |
| Hs.163323.0.A1_3p_at   | Hs.127748 | Solute carrier family 6 (neurotransmitter transporter). member 19                              | SLC6A19   | 9.3  | 2.6 | 0.008 |
| g5901963_3p_x_at       | Hs.252351 | HERV-H LTR-associating 2                                                                       | HHLA2     | 12.3 | 2.6 | 0.045 |
| g12655216_3p_a_at      | Hs.502773 | membrane-type 1 matrix metalloproteinase cytoplasmic tail binding protein-1                    | MTCBP-1   | 10.7 | 2.6 | 0.026 |
| Hs.82240.0.S3_3p_at    | Hs.82240  | syntaxin 3A                                                                                    | STX3A     | 9.7  | 2.6 | 0.014 |
| Hs.121849.0.S1_3p_a_at | Hs.356061 | microtubule-associated protein 1 light chain 3 beta                                            | MAP1LC3B  | 7.9  | 2.6 | 0.040 |
| g12803984_3p_x_at      | Hs.130853 | histone 1. H2bd                                                                                | HIST1H2BD | 8.3  | 2.6 | 0.047 |
| g4504024_3p_at         | Hs.28988  | glutaredoxin (thioltransferase)                                                                | GLRX      | 11.9 | 2.6 | 0.029 |
| Hs.234234.2.A1_3p_a_at | Hs.315235 | Aldolase B. fructose-bisphosphate                                                              | ALDOB     | 8.6  | 2.6 | 0.044 |
| g9295326_3p_at         | Hs.79025  | SNF-1 related kinase                                                                           | SNRK      | 9.2  | 2.6 | 0.004 |
| g7662019_3p_at         | Hs.82426  | KIAA0247                                                                                       | KIAA0247  | 11.0 | 2.6 | 0.008 |
| Hs.108530.1.S1_3p_a_at | Hs.108530 | transmembrane protein 30A                                                                      | TMEM30A   | 6.0  | 2.6 | 0.033 |
| g12240160_3p_s_at      | Hs.49753  | uveal autoantigen with coiled-coil domains and ankyrin repeats                                 | UACA      | 9.6  | 2.6 | 0.021 |
| g4504106_3p_x_at       | Hs.433951 | glutathione peroxidase 4 (phospholipid hydroperoxidase)                                        | GPX4      | 10.5 | 2.6 | 0.008 |
| Hs.8136.0.S2_3p_at     | Hs.8136   | endothelial PAS domain protein 1                                                               | EPAS1     | 10.6 | 2.6 | 0.021 |
| Hs.20726.0.A1_3p_at    | ---       | ---                                                                                            | ---       | 7.5  | 2.6 | 0.018 |
| Hs.26860.0.S1_3p_at    | Hs.369679 | progesterin and adipoQ receptor family member III                                              | PAQR3     | 8.2  | 2.6 | 0.038 |
| g12313878_3p_a_at      | Hs.165619 | mucin and cadherin-like                                                                        | MUCDHL    | 10.6 | 2.6 | 0.021 |
| Hs.24359.0.S1_3p_at    | Hs.24359  | Transcribed locus. weakly similar to XP_375099.1 hypothetical protein LOC283585 [Homo sapiens] | ---       | 10.5 | 2.6 | 0.004 |
| g13325115_3p_a_at      | Hs.279518 | amyloid beta (A4) precursor-like protein 2                                                     | APLP2     | 9.9  | 2.5 | 0.009 |
| Hs.167835.3.S1_3p_a_at | Hs.379991 | acyl-Coenzyme A oxidase 1. palmitoyl                                                           | ACOX1     | 9.6  | 2.5 | 0.034 |
| g8923197_3p_at         | Hs.131776 | pyroglutamyl-peptidase I                                                                       | PGPEP1    | 8.0  | 2.5 | 0.033 |
| Hs.266662.0.S1_3p_at   | Hs.129208 | death-associated protein kinase 2                                                              | DAPK2     | 8.0  | 2.5 | 0.030 |

|                        |           |                                                                                                                                                          |           |      |     |       |
|------------------------|-----------|----------------------------------------------------------------------------------------------------------------------------------------------------------|-----------|------|-----|-------|
| g13537296_3p_s_at      | Hs.334305 | diacylglycerol O-acyltransferase homolog 2 (mouse)                                                                                                       | DGAT2     | 7.7  | 2.5 | 0.007 |
| g11055999_3p_at        | Hs.521443 | PDZ and LIM domain 2 (mystique)                                                                                                                          | PDLIM2    | 9.2  | 2.5 | 0.038 |
| g4758087_3p_at         | Hs.17958  | galactose-3-O-sulfotransferase 1                                                                                                                         | GAL3ST1   | 8.7  | 2.5 | 0.021 |
| 211843_3p_x_at         | Hs.308638 | cytochrome P450, family 3, subfamily A, polypeptide 7                                                                                                    | CYP3A7    | 9.4  | 2.5 | 0.012 |
| g4758867_3p_at         | Hs.104772 | procollagen-proline, 2-oxoglutarate 4-dioxygenase (proline 4-hydroxylase), alpha polypeptide II                                                          | P4HA2     | 8.2  | 2.5 | 0.031 |
| Hs.18878.0.A1_3p_a_at  | Hs.443906 | egl nine homolog 3 (C. elegans)                                                                                                                          | EGLN3     | 7.7  | 2.5 | 0.010 |
| Hs.224630.0.A1_3p_at   | Hs.224630 | hypothetical protein FLJ33318                                                                                                                            | FLJ33318  | 8.7  | 2.5 | 0.006 |
| g5360207_3p_s_at       | Hs.522169 | iduronate 2-sulfatase (Hunter syndrome)                                                                                                                  | IDS       | 7.0  | 2.5 | 0.009 |
| g306441_3p_a_at        | Hs.110    | solute carrier family 3 (cystine, dibasic and neutral amino acid transporters, activator of cystine, dibasic and neutral amino acid transport), member 1 | SLC3A1    | 11.6 | 2.5 | 0.008 |
| Hs.50732.0.S1_3p_at    | Hs.50732  | protein kinase, AMP-activated, beta 2 non-catalytic subunit                                                                                              | PRKAB2    | 5.8  | 2.5 | 0.038 |
| g1079575_3p_s_at       | Hs.25363  | presenilin 2 (Alzheimer disease 4)                                                                                                                       | PSEN2     | 9.0  | 2.5 | 0.022 |
| Hs.75124.0.S2_3p_at    | Hs.112906 | cerebellar degeneration-related protein 2, 62kDa                                                                                                         | CDR2      | 10.0 | 2.5 | 0.039 |
| g11967982_3p_a_at      | Hs.57988  | rhomboid family 1 (Drosophila)                                                                                                                           | RHBDF1    | 8.2  | 2.5 | 0.005 |
| Hs.9834.0.A1_3p_at     | Hs.388715 | hypothetical protein LOC285733                                                                                                                           | LOC285733 | 7.7  | 2.5 | 0.014 |
| Hs.79299.0.S1_3p_at    | Hs.79299  | lipoma HMGIC fusion partner-like 2                                                                                                                       | LHFPL2    | 9.7  | 2.4 | 0.037 |
| g4507574_3p_a_at       | Hs.159    | tumor necrosis factor receptor superfamily, member 1A                                                                                                    | TNFRSF1A  | 10.7 | 2.4 | 0.006 |
| Hs.232604.0.S1_3p_at   | Hs.232604 | Hypothetical gene supported by AK026328                                                                                                                  | ---       | 10.4 | 2.4 | 0.008 |
| Hs.287995.0.S1_3p_s_at | Hs.75626  | CD58 antigen, (lymphocyte function-associated antigen 3)                                                                                                 | CD58      | 8.8  | 2.4 | 0.014 |
| g10952525_3p_a_at      | Hs.512618 | ras homolog gene family, member F (in filopodia)                                                                                                         | RHOF      | 7.1  | 2.4 | 0.009 |
| g12313880_3p_at        | Hs.165619 | mucin and cadherin-like                                                                                                                                  | MUCDHL    | 11.0 | 2.4 | 0.014 |
| Hs.148367.0.A1_3p_at   | Hs.127748 | Solute carrier family 6 (neurotransmitter transporter), member 19                                                                                        | SLC6A19   | 10.0 | 2.4 | 0.029 |
| Hs.9788.0.S1_3p_a_at   | Hs.9788   | Nedd4 family interacting protein 1                                                                                                                       | NDFIP1    | 8.3  | 2.4 | 0.026 |
| Hs.79402.1.A1_3p_at    | Hs.279832 | polymerase (RNA) II (DNA directed) polypeptide C, 33kDa                                                                                                  | POLR2C    | 10.3 | 2.4 | 0.011 |
| Hs.127748.0.A1_3p_at   | ---       | ---                                                                                                                                                      | ---       | 9.0  | 2.4 | 0.036 |
| g13376867_3p_x_at      | Hs.335355 | chromosome 6 open reading frame 29                                                                                                                       | C6orf29   | 9.8  | 2.4 | 0.045 |

|                        |           |                                                                                                                                             |                     |      |     |       |
|------------------------|-----------|---------------------------------------------------------------------------------------------------------------------------------------------|---------------------|------|-----|-------|
| g13129033_3p_at        | ---       | hypothetical protein MGC5395                                                                                                                | MGC5395             | 7.5  | 2.4 | 0.029 |
| Hs.15951.1.A1_3p_a_at  | Hs.15951  | proline-rich acidic protein 1                                                                                                               | PRAP1               | 9.5  | 2.4 | 0.021 |
| g881502_3p_a_at        | Hs.389536 | sulfotransferase family, cytosolic, 1A, phenol-preferring, member 2 /// sulfotransferase family, cytosolic, 1A, phenol-preferring, member 1 | SULT1A2 /// SULT1A1 | 10.0 | 2.4 | 0.028 |
| g9257247_3p_at         | Hs.6441   | tissue inhibitor of metalloproteinase 2                                                                                                     | TIMP2               | 7.9  | 2.4 | 0.040 |
| g4507302_3p_a_at       | Hs.389536 | sulfotransferase family, cytosolic, 1A, phenol-preferring, member 2 /// sulfotransferase family, cytosolic, 1A, phenol-preferring, member 1 | SULT1A2 /// SULT1A1 | 9.9  | 2.4 | 0.027 |
| g9910497_3p_a_at       | Hs.83883  | transmembrane, prostate androgen induced RNA                                                                                                | TMEPAI              | 6.7  | 2.4 | 0.015 |
| Hs.25220.1.S1_3p_a_at  | Hs.25220  | like-glycosyltransferase                                                                                                                    | LARGE               | 8.3  | 2.4 | 0.002 |
| 206514_3p_s_at         | Hs.106242 | cytochrome P450, family 4, subfamily F, polypeptide 3 /// cytochrome P450, family 4, subfamily F, polypeptide 2                             | CYP4F3 /// CYP4F2   | 7.5  | 2.4 | 0.018 |
| g4504106_3p_at         | Hs.433951 | glutathione peroxidase 4 (phospholipid hydroperoxidase)                                                                                     | GPX4                | 10.7 | 2.4 | 0.009 |
| Hs.173484.0.S2_3p_s_at | Hs.173484 | leucine rich repeat containing 8                                                                                                            | LRRC8               | 9.9  | 2.4 | 0.028 |
| Hs.301723.0.S1_3p_x_at | Hs.433297 | Chromosome 10 open reading frame 75                                                                                                         | C10orf75            | 7.7  | 2.4 | 0.024 |
| g13383475_3p_at        | Hs.182454 | NEDD8 ultimate buster-1                                                                                                                     | NYREN18             | 9.9  | 2.4 | 0.048 |
| Hs.149429.0.A1_3p_at   | Hs.1964   | solute carrier family 5 (sodium/glucose cotransporter), member 1                                                                            | SLC5A1              | 11.2 | 2.3 | 0.047 |
| Hs.283378.0.S1_3p_at   | Hs.283378 | hypothetical protein LOC253981                                                                                                              | LOC253981           | 10.2 | 2.3 | 0.027 |
| Hs.18593.0.A1_3p_at    | Hs.409314 | solute carrier family 36 (proton/amino acid symporter), member 1                                                                            | SLC36A1             | 7.5  | 2.3 | 0.035 |
| g4504850_3p_a_at       | Hs.444448 | potassium channel, subfamily K, member 5                                                                                                    | KCNK5               | 9.7  | 2.3 | 0.027 |
| Hs.9788.0.S3_3p_at     | Hs.9788   | Nedd4 family interacting protein 1                                                                                                          | NDFIP1              | 9.6  | 2.3 | 0.008 |
| g5174596_3p_at         | Hs.118630 | MAX interactor 1                                                                                                                            | MXI1                | 9.5  | 2.3 | 0.049 |
| g5454115_3p_a_at       | Hs.14894  | trans-golgi network protein 2                                                                                                               | TGOLN2              | 8.6  | 2.3 | 0.040 |
| g5453681_3p_a_at       | Hs.15299  | HMBA-inducible                                                                                                                              | HIS1                | 9.0  | 2.3 | 0.034 |
| g13097653_3p_s_at      | Hs.534537 | docking protein 4                                                                                                                           | DOK4                | 11.5 | 2.3 | 0.011 |
| g4507014_3p_at         | ---       | ---                                                                                                                                         | ---                 | 9.6  | 2.3 | 0.024 |
| g1890049_3p_at         | Hs.18069  | legumain                                                                                                                                    | LGMN                | 10.2 | 2.3 | 0.048 |
| Hs.127748.0.A1_3p_x_at | ---       | ---                                                                                                                                         | ---                 | 9.2  | 2.3 | 0.046 |
| g11139543_3p_x_at      | Hs.534552 | chemokine (C-X-C motif) ligand 16                                                                                                           | CXCL16              | 8.7  | 2.3 | 0.039 |
| g4507576_3p_at         | Hs.256278 | tumor necrosis factor receptor superfamily, member 1B                                                                                       | TNFRSF1B            | 9.2  | 2.3 | 0.005 |

|                        |           |                                                                        |                |      |     |       |
|------------------------|-----------|------------------------------------------------------------------------|----------------|------|-----|-------|
| g4758571_3p_at         | Hs.416495 | chromosome 1 open reading frame 8                                      | C1orf8         | 11.8 | 2.3 | 0.030 |
| 4844495C_3p_s_at       | Hs.158654 | KIAA1196 protein                                                       | KIAA1196       | 5.3  | 2.3 | 0.046 |
| Hs.54037.0.S1_3p_a_at  | Hs.54037  | ectonucleotide pyrophosphatase/phosphodiesterase 4 (putative function) | ENPP4          | 8.5  | 2.3 | 0.042 |
| Hs.102926.0.A1_3p_at   | Hs.417068 | JM11 protein                                                           | JM11           | 8.9  | 2.3 | 0.029 |
| g12053214_3p_at        | Hs.42635  | hypothetical protein DKFZp434K2435                                     | DKFZp434K2435  | 8.4  | 2.3 | 0.022 |
| g4503138_3p_a_at       | Hs.135226 | cathepsin B                                                            | CTSB           | 10.6 | 2.3 | 0.022 |
| Hs.91052.0.A1_3p_at    | Hs.380389 | chromosome 9 open reading frame 77                                     | C9orf77        | 8.3  | 2.3 | 0.038 |
| g4502024_3p_a_at       | Hs.78712  | aminolevulinate. delta-. synthase 1                                    | ALAS1          | 9.1  | 2.3 | 0.010 |
| g306754_3p_x_at        | Hs.458453 | gamma-glutamyltransferase-like 4 /// gamma-glutamyltransferase 1       | GGTL4 /// GGT1 | 8.7  | 2.3 | 0.033 |
| Hs.117865.1.S2_3p_at   | Hs.117865 | solute carrier family 17 (anion/sugar transporter). member 5           | SLC17A5        | 9.5  | 2.2 | 0.042 |
| g11321600_3p_at        | Hs.26010  | phosphofructokinase. platelet                                          | PFKP           | 9.9  | 2.2 | 0.023 |
| Hs.11638.0.S1_3p_a_at  | Hs.11638  | acyl-CoA synthetase long-chain family member 5                         | ACSL5          | 12.5 | 2.2 | 0.045 |
| g2078324_3p_a_at       | Hs.198288 | protein tyrosine phosphatase. receptor type. R                         | PTPRR          | 6.7  | 2.2 | 0.018 |
| Hs.20894.0.S3_3p_at    | Hs.20894  | N-deacetylase/N-sulfotransferase (heparan glucosaminyl) 1              | NDST1          | 9.5  | 2.2 | 0.038 |
| Hs.8068.2.S1_3p_a_at   | Hs.505806 | pre-B-cell leukemia transcription factor interacting protein 1         | PBXIP1         | 9.0  | 2.2 | 0.038 |
| g5802975_3p_at         | Hs.74120  | chromosome 10 open reading frame 116                                   | C10orf116      | 10.2 | 2.2 | 0.041 |
| Hs.167529.1.A1_3p_a_at | ---       | ---                                                                    | ---            | 7.0  | 2.2 | 0.028 |
| Hs.240767.0.S1_3p_at   | Hs.438872 | chromosome 6 open reading frame 72                                     | C6orf72        | 7.9  | 2.2 | 0.009 |
| g4503802_3p_at         | Hs.576    | fucosidase. alpha-L- 1. tissue                                         | FUCA1          | 11.3 | 2.2 | 0.009 |
| g4507576_3p_x_at       | Hs.256278 | tumor necrosis factor receptor superfamily. member 1B                  | TNFRSF1B       | 8.4  | 2.2 | 0.005 |
| g11139543_3p_at        | Hs.534552 | chemokine (C-X-C motif) ligand 16                                      | CXCL16         | 8.7  | 2.2 | 0.047 |
| Hs.209061.0.S3_3p_at   | Hs.209061 | RIO kinase 3 (yeast)                                                   | RIOK3          | 11.6 | 2.2 | 0.042 |
| g340067_3p_x_at        | Hs.183704 | ubiquitin C                                                            | UBC            | 12.1 | 2.2 | 0.034 |

|                        |                         |                                                                                                                                                                                                                                                                                                                                                                                                                                                                                           |                                                                                                 |      |     |       |
|------------------------|-------------------------|-------------------------------------------------------------------------------------------------------------------------------------------------------------------------------------------------------------------------------------------------------------------------------------------------------------------------------------------------------------------------------------------------------------------------------------------------------------------------------------------|-------------------------------------------------------------------------------------------------|------|-----|-------|
| g13487899_3p_s_at      | Hs.124112               | UDP glycosyltransferase 1 family. polypeptide A3 /// UDP glycosyltransferase 1 family. polypeptide A6 /// UDP glycosyltransferase 1 family. polypeptide A1 /// UDP glycosyltransferase 1 family. polypeptide A10 /// UDP glycosyltransferase 1 family. polypeptide A7 /// UDP glycosyltransferase 1 family. polypeptide A5 /// UDP glycosyltransferase 1 family. polypeptide A8 /// UDP glycosyltransferase 1 family. polypeptide A9 /// UDP glycosyltransferase 1 family. polypeptide A4 | UGT1A3 /// UGT1A6 /// UGT1A1 /// UGT1A10 /// UGT1A7 /// UGT1A5 /// UGT1A8 /// UGT1A9 /// UGT1A4 | 8.1  | 2.2 | 0.040 |
| Hs.149846.1.S1_3p_a_at | Hs.149846               | integrin. beta 5                                                                                                                                                                                                                                                                                                                                                                                                                                                                          | ITGB5                                                                                           | 8.9  | 2.2 | 0.021 |
| g12655188_3p_a_at      | Hs.129129               | testis derived transcript (3 LIM domains)                                                                                                                                                                                                                                                                                                                                                                                                                                                 | TES                                                                                             | 7.5  | 2.2 | 0.045 |
| g12803610_3p_a_at      | Hs.4187                 | intraflagellar transport protein IFT20                                                                                                                                                                                                                                                                                                                                                                                                                                                    | LOC90410                                                                                        | 10.1 | 2.2 | 0.018 |
| Hs.234234.2.A1_3p_x_at | Hs.315235               | Aldolase B. fructose-bisphosphate                                                                                                                                                                                                                                                                                                                                                                                                                                                         | ALDOB                                                                                           | 8.6  | 2.2 | 0.036 |
| g12654738_3p_at        | Hs.23131                | kinesin family member C3                                                                                                                                                                                                                                                                                                                                                                                                                                                                  | KIFC3                                                                                           | 10.1 | 2.2 | 0.037 |
| g4503106_3p_at         | Hs.304682               | cystatin C (amyloid angiopathy and cerebral hemorrhage)                                                                                                                                                                                                                                                                                                                                                                                                                                   | CST3                                                                                            | 9.3  | 2.2 | 0.030 |
| Hs.296670.0.S1_3p_at   | Hs.493302               | Transcribed locus. weakly similar to XP_375099.1 hypothetical protein LOC283585 [Homo sapiens]                                                                                                                                                                                                                                                                                                                                                                                            | ---                                                                                             | 7.1  | 2.2 | 0.021 |
| Hs.268551.0.S1_3p_at   | Hs.268551               | receptor-interacting serine-threonine kinase 3                                                                                                                                                                                                                                                                                                                                                                                                                                            | RIPK3                                                                                           | 8.3  | 2.2 | 0.032 |
| g181623_3p_at          | Hs.436928               | deoxyribonuclease I                                                                                                                                                                                                                                                                                                                                                                                                                                                                       | DNASE1                                                                                          | 9.2  | 2.2 | 0.015 |
| g7657014_3p_at         | Hs.273213               | hypothetical protein HSPC117                                                                                                                                                                                                                                                                                                                                                                                                                                                              | HSPC117                                                                                         | 11.7 | 2.1 | 0.043 |
| Hs2.35406.1.S1_3p_at   | Hs.223296               | GPI-mannosyltransferase subunit                                                                                                                                                                                                                                                                                                                                                                                                                                                           | FLJ20522                                                                                        | 7.2  | 2.1 | 0.035 |
| Hs.288924.0.S1_3p_at   | Hs.147663 /// Hs.444436 | Protein tyrosine phosphatase. non-receptor type 9 /// AF464140                                                                                                                                                                                                                                                                                                                                                                                                                            | PTPN9 /// LOC163590                                                                             | 10.1 | 2.1 | 0.021 |
| Hs.264915.0.S1_3p_at   | ---                     | ---                                                                                                                                                                                                                                                                                                                                                                                                                                                                                       | ---                                                                                             | 8.2  | 2.1 | 0.034 |
| 209919_3p_x_at         | Hs.352119               | gamma-glutamyltransferase 1                                                                                                                                                                                                                                                                                                                                                                                                                                                               | GGT1                                                                                            | 8.0  | 2.1 | 0.023 |
| Hs.20524.0.S1_3p_at    | Hs.445459               | hypothetical protein FLJ22761                                                                                                                                                                                                                                                                                                                                                                                                                                                             | FLJ22761                                                                                        | 10.1 | 2.1 | 0.032 |
| g7657594_3p_a_at       | Hs.475792               | small membrane protein 1                                                                                                                                                                                                                                                                                                                                                                                                                                                                  | SMP1                                                                                            | 9.5  | 2.1 | 0.043 |
| g12652742_3p_s_at      | Hs.438972               | chromosome 9 open reading frame 28                                                                                                                                                                                                                                                                                                                                                                                                                                                        | C9orf28                                                                                         | 7.7  | 2.1 | 0.040 |

|                        |           |                                                                            |           |      |     |       |
|------------------------|-----------|----------------------------------------------------------------------------|-----------|------|-----|-------|
| g13376444_3p_at        | Hs.390817 | myosin XVB. pseudogene                                                     | MYO15B    | 9.6  | 2.1 | 0.020 |
| Hs.64179.2.S1_3p_a_at  | Hs.439652 | syndecan binding protein (syntenin) 2                                      | SDCBP2    | 11.0 | 2.1 | 0.048 |
| g4507544_3p_at         | Hs.15791  | transmembrane 7 superfamily member 1 (upregulated in kidney)               | TM7SF1    | 6.9  | 2.1 | 0.023 |
| g2647407_3p_a_at       | Hs.183704 | ubiquitin C                                                                | UBC       | 13.0 | 2.1 | 0.044 |
| g8923529_3p_s_at       | Hs.232459 | chromosome 9 open reading frame 95                                         | C9orf95   | 9.8  | 2.1 | 0.029 |
| g4501864_3p_s_at       | Hs.387567 | ATP citrate lyase                                                          | ACLY      | 11.1 | 2.1 | 0.019 |
| g13259538_3p_at        | Hs.26458  | methionine sulfoxide reductase A                                           | MSRA      | 10.4 | 2.1 | 0.016 |
| g9506568_3p_a_at       | Hs.207134 | erythrocyte membrane protein band 4.1 like 4B                              | EPB41L4B  | 11.8 | 2.1 | 0.040 |
| Hs.103158.0.A1_3p_at   | Hs.444424 | chromosome 9 open reading frame 103                                        | C9orf103  | 8.7  | 2.1 | 0.045 |
| g4759139_3p_at         | Hs.396783 | solute carrier family 9 (sodium/hydrogen exchanger). isoform 3 regulator 1 | SLC9A3R1  | 11.4 | 2.1 | 0.011 |
| g4505558_3p_at         | Hs.339    | purinergic receptor P2Y, G-protein coupled. 2                              | P2RY2     | 7.2  | 2.1 | 0.010 |
| Hs.15299.0.S1_3p_s_at  | Hs.15299  | HMBA-inducible                                                             | HIS1      | 9.5  | 2.1 | 0.024 |
| Hs.4984.1.S1_3p_a_at   | Hs.356823 | KIAA0828 protein                                                           | KIAA0828  | 6.6  | 2.1 | 0.042 |
| g4505570_3p_s_at       | Hs.310781 | sequestosome 1                                                             | SQSTM1    | 11.5 | 2.1 | 0.004 |
| Hs.795.1.S1_3p_x_at    | Hs.417332 | histone 2. H2aa                                                            | HIST2H2AA | 9.1  | 2.1 | 0.011 |
| Hs.209061.0.S1_3p_a_at | Hs.209061 | RIO kinase 3 (yeast)                                                       | RIOK3     | 6.8  | 2.0 | 0.014 |
| Hs.99175.0.S1_3p_at    | Hs.390817 | myosin XVB. pseudogene                                                     | MYO15B    | 10.5 | 2.0 | 0.011 |
| g5031560_3p_at         | Hs.437229 | glycoprotein A33 (transmembrane)                                           | GPA33     | 12.3 | 2.0 | 0.014 |
| g13375941_3p_at        | Hs.526404 | Hypothetical protein FLJ22938                                              | FLJ22938  | 7.0  | 2.0 | 0.026 |
| Hs.214783.0.S2_3p_at   | Hs.423523 | forkhead box O3A                                                           | FOXO3A    | 9.8  | 2.0 | 0.046 |
| g6005943_3p_at         | Hs.534392 | villin 1                                                                   | VIL1      | 10.4 | 2.0 | 0.033 |
| Hs.83992.0.S1_3p_at    | ---       | ---                                                                        | ---       | 11.4 | 2.0 | 0.038 |
| g4503142_3p_at         | Hs.121575 | cathepsin D (lysosomal aspartyl protease)                                  | CTSD      | 8.3  | 2.0 | 0.027 |
| g13654271_3p_s_at      | Hs.473855 | hypothetical protein HT036                                                 | HT036     | 8.9  | 2.0 | 0.047 |
| Hs.99175.0.S1_3p_x_at  | Hs.390817 | myosin XVB. pseudogene                                                     | MYO15B    | 10.2 | 2.0 | 0.014 |
| g7705816_3p_s_at       | Hs.374485 | HSPC038 protein                                                            | LOC51123  | 11.0 | 2.0 | 0.039 |
| g13376740_3p_at        | ---       | ---                                                                        | ---       | 8.7  | 2.0 | 0.024 |
| Hs.135056.0.S1_3p_at   | Hs.135056 | chromosome 20 open reading frame 139                                       | C20orf139 | 8.4  | 2.0 | 0.018 |
| Hs.236522.0.S1_3p_at   | Hs.441550 | chromosome 20 open reading frame 22                                        | C20orf22  | 8.5  | 2.0 | 0.009 |

|                        |           |                                                                                                          |                     |      |     |       |
|------------------------|-----------|----------------------------------------------------------------------------------------------------------|---------------------|------|-----|-------|
| g4506760_3p_s_at       | Hs.143873 | S100 calcium binding protein A10 (annexin II ligand. calpactin I. light polypeptide (p11))               | S100A10             | 12.4 | 2.0 | 0.042 |
| g13236537_3p_at        | Hs.132380 | fatty acid 2-hydroxylase                                                                                 | FA2H                | 7.6  | 2.0 | 0.043 |
| Hs.302810.0.S1_3p_at   | Hs.130463 | chromosome 20 open reading frame 35                                                                      | C20orf35            | 7.9  | 2.0 | 0.029 |
| Hs.155606.2.S1_3p_s_at | Hs.443452 | paired related homeobox 1 /// similar to rat tricarboxylate carrier-like protein                         | PRRX1 /// BA108L7.2 | 9.7  | 2.0 | 0.043 |
| g5531846_3p_a_at       | Hs.284296 | surfeit 4                                                                                                | SURF4               | 9.4  | 2.0 | 0.018 |
| g11968026_3p_at        | Hs.380897 | fused toes homolog (mouse)                                                                               | FTS                 | 7.4  | 2.0 | 0.025 |
| Hs.198689.0.S1_3p_a_at | Hs.443518 | dystonin                                                                                                 | DST                 | 7.8  | 2.0 | 0.027 |
| g5729771_3p_a_at       | Hs.30213  | ceroid-lipofuscinosis. neuronal 5                                                                        | CLN5                | 7.4  | 2.0 | 0.044 |
| g4507164_3p_at         | Hs.371696 | Nuclear antigen Sp100                                                                                    | SP100               | 9.7  | 2.0 | 0.036 |
| g5031782_3p_at         | Hs.409200 | interferon gamma receptor 2 (interferon gamma transducer 1)                                              | IFNGR2              | 11.2 | 2.0 | 0.034 |
| Hs.110771.0.S2_3p_at   | Hs.14894  | trans-golgi network protein 2                                                                            | TGOLN2              | 11.7 | 1.9 | 0.023 |
| Hs.44175.1.S1_3p_at    | Hs.44175  | SEC15-like 2 (S. cerevisiae)                                                                             | SEC15L2             | 6.0  | 1.9 | 0.042 |
| Hs.178186.1.S1_3p_a_at | ---       | ---                                                                                                      | ---                 | 7.9  | 1.9 | 0.002 |
| 217144_3p_at           | ---       | ---                                                                                                      | ---                 | 9.3  | 1.9 | 0.040 |
| g4503142_3p_x_at       | Hs.121575 | cathepsin D (lysosomal aspartyl protease)                                                                | CTSD                | 10.1 | 1.9 | 0.021 |
| Hs.173135.1.S1_3p_s_at | Hs.173135 | dual-specificity tyrosine-(Y)-phosphorylation regulated kinase 2                                         | DYRK2               | 8.6  | 1.9 | 0.041 |
| Hs.178738.1.A1_3p_at   | ---       | ---                                                                                                      | ---                 | 8.3  | 1.9 | 0.003 |
| 224624_3p_at           | Hs.173484 | leucine rich repeat containing 8                                                                         | LRRC8               | 8.8  | 1.9 | 0.045 |
| g5597012_3p_a_at       | Hs.429658 | ceroid-lipofuscinosis. neuronal 2. late infantile (Jansky-Bielschowsky disease)                          | CLN2                | 9.7  | 1.9 | 0.026 |
| Hs.8852.0.A1_3p_at     | Hs.8852   | Zinc finger. A20 domain containing 1                                                                     | ZA20D1              | 5.1  | 1.9 | 0.038 |
| g179094_3p_a_at        | Hs.77813  | sphingomyelin phosphodiesterase 1. acid lysosomal (acid sphingomyelinase)                                | SMPD1               | 8.3  | 1.9 | 0.008 |
| Hs.40112.0.A1_3p_at    | Hs.352250 | GATA binding protein 5                                                                                   | GATA5               | 7.0  | 1.9 | 0.039 |
| Hs.130714.0.S1_3p_at   | Hs.130714 | Similar to HSPC323                                                                                       | ---                 | 12.4 | 1.9 | 0.024 |
| Hs.98992.0.A1_3p_at    | ---       | ---                                                                                                      | ---                 | 7.4  | 1.9 | 0.028 |
| Hs2.344350.1.S1_3p_at  | Hs.344350 | Homo sapiens. clone IMAGE:5303182. mRNA                                                                  | ---                 | 9.4  | 1.9 | 0.008 |
| g178752_3p_at          | Hs.170222 | solute carrier family 9 (sodium/hydrogen exchanger). isoform 1 (antiporter. Na+/H+. amiloride sensitive) | SLC9A1              | 9.9  | 1.9 | 0.028 |

|                         |           |                                                                                    |           |      |     |       |
|-------------------------|-----------|------------------------------------------------------------------------------------|-----------|------|-----|-------|
| Hs.75216.0.S2_3p_a_at   | Hs.75216  | protein tyrosine phosphatase. receptor type. F                                     | PTPRF     | 11.3 | 1.9 | 0.040 |
| 4850925C_3p_x_at        | Hs.390817 | myosin XVB. pseudogene                                                             | MYO15B    | 7.4  | 1.9 | 0.035 |
| g13436385_3p_s_at       | Hs.437475 | signal transducer and activator of transcription 6. interleukin-4 induced          | STAT6     | 9.0  | 1.9 | 0.020 |
| 200766_3p_at            | Hs.121575 | cathepsin D (lysosomal aspartyl protease)                                          | CTSD      | 7.6  | 1.9 | 0.039 |
| Hs.129782.2.S1_3p_x_at  | Hs.489354 | mucin 3B                                                                           | MUC3B     | 10.2 | 1.9 | 0.011 |
| g6042199_3p_a_at        | Hs.259047 | membrane metallo-endopeptidase (neutral endopeptidase. enkephalinase. CALLA. CD10) | MME       | 11.9 | 1.9 | 0.045 |
| 212196_3p_at            | Hs.71968  | Interleukin 6 signal transducer (gp130. oncostatin M receptor)                     | IL6ST     | 7.5  | 1.9 | 0.040 |
| Hs.61469.0.S2_3p_at     | Hs.61469  | chromosome X open reading frame 9                                                  | CXorf9    | 6.6  | 1.9 | 0.045 |
| g7110714_3p_at          | Hs.430576 | SEC14-like 2 (S. cerevisiae)                                                       | SEC14L2   | 7.4  | 1.9 | 0.016 |
| Hs.101490.0.A1_3p_a_at  | ---       | ---                                                                                | ---       | 6.7  | 1.9 | 0.008 |
| g7657004_3p_s_at        | Hs.129208 | death-associated protein kinase 2                                                  | DAPK2     | 8.8  | 1.9 | 0.007 |
| g4502678_3p_at          | Hs.445570 | CD63 antigen (melanoma 1 antigen)                                                  | CD63      | 11.5 | 1.9 | 0.022 |
| g5453915_3p_a_at        | Hs.9071   | progesterone receptor membrane component 2                                         | PGRMC2    | 11.9 | 1.9 | 0.033 |
| g13375714_3p_at         | Hs.334854 | adiponectin receptor 2                                                             | ADIPOR2   | 10.2 | 1.9 | 0.022 |
| Hs2.172702.2.S1_3p_at   | Hs.396533 | folliculin                                                                         | FLCN      | 7.2  | 1.8 | 0.026 |
| g4505876_3p_s_at        | Hs.79706  | plectin 1. intermediate filament binding protein 500kDa                            | PLEC1     | 10.0 | 1.8 | 0.043 |
| 208284_3p_x_at          | Hs.352119 | gamma-glutamyltransferase 1                                                        | GGT1      | 7.9  | 1.8 | 0.016 |
| g967208_3p_a_at         | Hs.32956  | fucosyltransferase 6 (alpha (1.3) fucosyltransferase)                              | FUT6      | 8.7  | 1.8 | 0.042 |
| g13376122_3p_at         | Hs.145717 | hypothetical protein FLJ13798                                                      | FLJ13798  | 8.5  | 1.8 | 0.033 |
| Hs.178186.0.S1_3p_a_at  | ---       | ---                                                                                | ---       | 7.9  | 1.8 | 0.005 |
| g10863968_3p_s_at       | Hs.82520  | polymerase (DNA-directed). delta 4                                                 | POLD4     | 8.6  | 1.8 | 0.017 |
| g8922698_3p_a_at        | Hs.149185 | CNDP dipeptidase 2 (metallopeptidase M20 family)                                   | CNDP2     | 12.4 | 1.8 | 0.015 |
| g13436070_3p_at         | Hs.11184  | ubiquitin-conjugating enzyme E2R 2                                                 | UBE2R2    | 8.1  | 1.8 | 0.021 |
| g4507746_3p_at          | Hs.501739 | thioredoxin reductase 1                                                            | TXNRD1    | 11.0 | 1.8 | 0.039 |
| Hs2.182081.1.S1_3p_s_at | Hs.182081 | KIAA1811 protein                                                                   | KIAA1811  | 9.8  | 1.8 | 0.014 |
| g12641848_3p_s_at       | Hs.6518   | GABA(A) receptor-associated protein-like 2                                         | GABARAPL2 | 11.8 | 1.8 | 0.024 |
| Hs.180236.0.A1_3p_at    | Hs.180236 | Testis expressed sequence 10                                                       | TEX10     | 5.7  | 1.8 | 0.043 |
| g7328089_3p_a_at        | Hs.422334 | nuclear receptor coactivator 4                                                     | NCOA4     | 13.0 | 1.8 | 0.036 |
| g11967980_3p_s_at       | Hs.44278  | RAB17. member RAS oncogene family                                                  | RAB17     | 11.9 | 1.8 | 0.049 |



|                         |           |                                                                                  |           |      |     |       |
|-------------------------|-----------|----------------------------------------------------------------------------------|-----------|------|-----|-------|
| g1165218_3p_at          | Hs.405474 | PTK2B protein tyrosine kinase 2 beta                                             | PTK2B     | 7.2  | 1.8 | 0.040 |
| Hs.247891.0.S1_3p_at    | Hs.356190 | ubiquitin B                                                                      | UBB       | 9.7  | 1.8 | 0.041 |
| g12654942_3p_at         | Hs.414241 | phosphatidylinositol glycan. class S                                             | PIGS      | 11.9 | 1.8 | 0.014 |
| g1165218_3p_x_at        | Hs.405474 | PTK2B protein tyrosine kinase 2 beta                                             | PTK2B     | 7.3  | 1.8 | 0.023 |
| Hs.274701.0.S2_3p_at    | Hs.274701 | thymidine kinase 2. mitochondrial                                                | TK2       | 8.3  | 1.8 | 0.025 |
| g4758091_3p_a_at        | Hs.513557 | chitobiase. di-N-acetyl-                                                         | CTBS      | 5.9  | 1.8 | 0.049 |
| g4885508_3p_s_at        | Hs.439671 | neuroblastoma. suppression of tumorigenicity 1                                   | NBL1      | 11.4 | 1.8 | 0.009 |
| Hs2.376047.1.S1_3p_s_at | Hs.376047 | hypothetical protein FLJ20847                                                    | FLJ20847  | 9.9  | 1.8 | 0.049 |
| Hs.7934.2.S1_3p_at      | Hs.7934   | secretory carrier membrane protein 5                                             | SCAMP5    | 8.8  | 1.8 | 0.019 |
| g4506310_3p_a_at        | Hs.75216  | protein tyrosine phosphatase. receptor type. F                                   | PTPRF     | 11.2 | 1.8 | 0.019 |
| g5453745_3p_at          | Hs.118131 | 5,10-methenyltetrahydrofolate synthetase (5-formyltetrahydrofolate cyclo-ligase) | MTHFS     | 9.5  | 1.8 | 0.040 |
| g4885350_3p_x_at        | Hs.103502 | glutamic-pyruvate transaminase (alanine aminotransferase)                        | GPT       | 9.2  | 1.8 | 0.033 |
| Hs.75216.0.S1_3p_a_at   | Hs.75216  | protein tyrosine phosphatase. receptor type. F                                   | PTPRF     | 7.7  | 1.8 | 0.025 |
| Hs.60371.0.A1_3p_at     | ---       | ---                                                                              | ---       | 7.4  | 1.8 | 0.048 |
| g4504610_3p_a_at        | Hs.76473  | insulin-like growth factor 2 receptor                                            | IGF2R     | 9.9  | 1.8 | 0.049 |
| Hs.247891.0.S1_3p_x_at  | Hs.356190 | ubiquitin B                                                                      | UBB       | 9.9  | 1.8 | 0.049 |
| Hs.49500.0.S1_3p_at     | Hs.49500  | KIAA0746 protein                                                                 | KIAA0746  | 8.5  | 1.8 | 0.004 |
| Hs.98401.0.S1_3p_at     | Hs.438669 | Insulin receptor                                                                 | INSR      | 9.8  | 1.8 | 0.039 |
| Hs.102471.0.S1_3p_a_at  | Hs.102471 | phosphatase and actin regulator 2                                                | PHACTR2   | 5.5  | 1.8 | 0.041 |
| g5931954_3p_a_at        | Hs.295137 | autocrine motility factor receptor                                               | AMFR      | 9.0  | 1.8 | 0.036 |
| 218280_3p_x_at          | Hs.417332 | histone 2. H2aa                                                                  | HIST2H2AA | 7.6  | 1.7 | 0.050 |
| g13375671_3p_at         | Hs.5366   | EPS8-like 3                                                                      | EPS8L3    | 9.9  | 1.7 | 0.036 |
| g4557881_3p_at          | Hs.84     | interleukin 2 receptor. gamma (severe combined immunodeficiency)                 | IL2RG     | 8.1  | 1.7 | 0.045 |
| g12653928_3p_at         | Hs.44468  | chromosome 6 open reading frame 80                                               | C6orf80   | 9.7  | 1.7 | 0.018 |
| Hs.218212.0.A1_3p_at    | Hs.85950  | hypothetical protein MGC33648                                                    | MGC33648  | 8.4  | 1.7 | 0.008 |
| Hs.236522.0.S1_3p_x_at  | Hs.441550 | chromosome 20 open reading frame 22                                              | C20orf22  | 8.4  | 1.7 | 0.038 |
| g7669500_3p_x_at        | Hs.150101 | lysosomal-associated membrane protein 1                                          | LAMP1     | 11.3 | 1.7 | 0.036 |
| Hs.10346.0.S2_3p_at     | Hs.10346  | chromosome 10 open reading frame 26                                              | C10orf26  | 10.0 | 1.7 | 0.029 |

|                        |           |                                                                                  |              |      |     |       |
|------------------------|-----------|----------------------------------------------------------------------------------|--------------|------|-----|-------|
| g7669500_3p_a_at       | Hs.150101 | lysosomal-associated membrane protein 1                                          | LAMP1        | 12.9 | 1.7 | 0.005 |
| Hs.103419.1.S1_3p_a_at | Hs.258563 | fasciculation and elongation protein zeta 2 (zygin II)                           | FEZ2         | 10.4 | 1.7 | 0.045 |
| Hs.64239.0.A1_3p_s_at  | Hs.128366 | IBR domain containing 3                                                          | IBRDC3       | 7.5  | 1.7 | 0.036 |
| g9506762_3p_a_at       | Hs.13011  | GTP binding protein 2                                                            | GTPBP2       | 9.8  | 1.7 | 0.033 |
| g4504776_3p_at         | Hs.1741   | integrin, beta 7                                                                 | ITGB7        | 7.9  | 1.7 | 0.045 |
| g13279166_3p_a_at      | Hs.103665 | villin-like                                                                      | VILL         | 8.1  | 1.7 | 0.038 |
| Hs.74614.1.S1_3p_a_at  | Hs.74614  | tight junction protein 1 (zona occludens 1)                                      | TJP1         | 6.8  | 1.7 | 0.044 |
| g4557614_3p_at         | Hs.75641  | galactose-1-phosphate uridylyltransferase                                        | GALT         | 8.9  | 1.7 | 0.031 |
| Hs.2014.1.S1_3p_at     | Hs.2014   | T cell receptor delta locus                                                      | TRD@         | 8.4  | 1.7 | 0.036 |
| g11024713_3p_at        | Hs.356190 | ubiquitin B                                                                      | UBB          | 13.4 | 1.7 | 0.018 |
| Hs.279518.4.S1_3p_a_at | Hs.279518 | amyloid beta (A4) precursor-like protein 2                                       | APLP2        | 9.6  | 1.7 | 0.037 |
| g5360209_3p_at         | Hs.183986 | poliovirus receptor-related 2 (herpesvirus entry mediator B)                     | PVRL2        | 7.9  | 1.7 | 0.030 |
| g6031182_3p_a_at       | Hs.120870 | mannosyl (alpha-1.3)-glycoprotein beta-1.2-N-acetylglucosaminyltransferase       | MGAT1        | 9.1  | 1.7 | 0.015 |
| g967208_3p_x_at        | Hs.32956  | fucosyltransferase 6 (alpha (1.3) fucosyltransferase)                            | FUT6         | 7.7  | 1.7 | 0.039 |
| 207131_3p_x_at         | Hs.352119 | gamma-glutamyltransferase 1                                                      | GGT1         | 7.9  | 1.7 | 0.027 |
| g11415023_3p_at        | Hs.172690 | diacylglycerol kinase, alpha 80kDa                                               | DGKA         | 9.9  | 1.7 | 0.043 |
| g4503456_3p_a_at       | Hs.75794  | endothelial differentiation, lysophosphatidic acid G-protein-coupled receptor, 2 | EDG2         | 7.3  | 1.7 | 0.038 |
| 219173_3p_at           | Hs.390817 | myosin XVB, pseudogene                                                           | MYO15B       | 7.8  | 1.7 | 0.018 |
| g13375755_3p_at        | Hs.422676 | hypothetical protein FLJ22709                                                    | FLJ22709     | 9.0  | 1.6 | 0.045 |
| g13477108_3p_x_at      | Hs.271599 | yippee-like 3 (Drosophila)                                                       | YPEL3        | 9.0  | 1.6 | 0.019 |
| Hs.37477.0.A1_3p_at    | Hs.37477  | FLJ42654 protein                                                                 | FLJ42654     | 8.4  | 1.6 | 0.034 |
| g9910225_3p_s_at       | Hs.416456 | FN5 protein                                                                      | FN5          | 10.1 | 1.6 | 0.034 |
| g4505306_3p_s_at       | Hs.370421 | myosin VIIA (Usher syndrome 1B (autosomal recessive, severe))                    | MYO7A        | 7.2  | 1.6 | 0.014 |
| Hs.12320.0.A1_3p_at    | Hs.6920   | hypothetical protein MGC45562                                                    | MGC45562     | 5.3  | 1.6 | 0.041 |
| g8922156_3p_s_at       | Hs.426359 | DKFZp564J157 protein                                                             | DKFZp564J157 | 12.6 | 1.6 | 0.039 |
| g2804283_3p_a_at       | Hs.41682  | killer cell lectin-like receptor subfamily D, member 1                           | KLRD1        | 6.1  | 1.6 | 0.039 |
| Hs.197613.0.A1_3p_at   | Hs.197613 | Similar to RIKEN cDNA 1110035L05                                                 | ---          | 8.5  | 1.6 | 0.017 |
| 59375_3p_at            | Hs.390817 | myosin XVB, pseudogene                                                           | MYO15B       | 7.8  | 1.6 | 0.021 |
| Hs.279832.1.A1_3p_a_at | Hs.534537 | docking protein 4                                                                | DOK4         | 6.3  | 1.6 | 0.046 |

|                        |           |                                                                                                |              |      |     |       |
|------------------------|-----------|------------------------------------------------------------------------------------------------|--------------|------|-----|-------|
| g5174578_3p_x_at       | Hs.239663 | myeloid/lymphoid or mixed-lineage leukemia (trithorax homolog. Drosophila); translocated to. 7 | MLLT7        | 9.0  | 1.6 | 0.014 |
| g7656921_3p_a_at       | Hs.12107  | putative breast adenocarcinoma marker (32kD)                                                   | BC-2         | 11.2 | 1.6 | 0.030 |
| g13445909_3p_at        | Hs.154628 | radial spokehead-like 2                                                                        | RSHL2        | 6.3  | 1.6 | 0.024 |
| g6005763_3p_at         | Hs.534435 | GABA(A) receptor-associated protein                                                            | GABARAP      | 11.8 | 1.6 | 0.043 |
| g5006272_3p_s_at       | Hs.274329 | TP53 activated protein 1                                                                       | TP53AP1      | 8.2  | 1.6 | 0.020 |
| Hs2.323265.1.S1_3p_at  | ---       | hypothetical protein LOC283639                                                                 | LOC283639    | 8.5  | 1.6 | 0.039 |
| g4758343_3p_at         | Hs.433300 | Fc fragment of IgE. high affinity I. receptor for; gamma polypeptide                           | FCER1G       | 7.5  | 1.6 | 0.020 |
| Hs.75334.0.S1_3p_a_at  | Hs.75334  | exostoses (multiple) 2                                                                         | EXT2         | 8.7  | 1.6 | 0.030 |
| g829622_3p_at          | Hs.511744 | myosin regulatory light chain MRLC2                                                            | MRLC2        | 13.1 | 1.6 | 0.048 |
| Hs.14478.0.S1_3p_at    | Hs.14478  | hypothetical protein DKFZp762H185                                                              | DKFZp762H185 | 7.2  | 1.6 | 0.032 |
| Hs.184029.0.S1_3p_a_at | Hs.444460 | hypothetical protein DKFZp761A052                                                              | DKFZp761A052 | 7.0  | 1.6 | 0.019 |
| g4557432_3p_at         | Hs.652    | tumor necrosis factor (ligand) superfamily. member 5 (hyper-IgM syndrome)                      | TNFSF5       | 6.1  | 1.6 | 0.041 |
| Hs.198278.1.A1_3p_at   | Hs.198278 | 6-phosphofructo-2-kinase/fructose-2,6-biphosphatase 4                                          | PFKFB4       | 7.7  | 1.6 | 0.045 |
| g13236513_3p_x_at      | Hs.300691 | chromosome 6 open reading frame 106                                                            | C6orf106     | 5.1  | 1.6 | 0.042 |
| g8923274_3p_at         | Hs.440401 | all-trans-13.14-dihydroretinol saturase                                                        | FLJ20296     | 12.5 | 1.6 | 0.048 |
| Hs.82719.0.S2_3p_at    | Hs.82719  | hypothetical protein MGC21416                                                                  | MGC21416     | 7.8  | 1.6 | 0.024 |
| 214020_3p_x_at         | ---       | ---                                                                                            | ---          | 6.4  | 1.6 | 0.030 |
| Hs.55947.0.S1_3p_at    | Hs.55947  | pecanex homolog (Drosophila)                                                                   | PCNX         | 6.3  | 1.6 | 0.040 |
| g8922634_3p_s_at       | Hs.3376   | TBC1 domain family. member 13                                                                  | TBC1D13      | 8.8  | 1.6 | 0.038 |
| g4929600_3p_a_at       | Hs.433760 | calcium binding protein 39                                                                     | CAB39        | 6.2  | 1.6 | 0.021 |
| g4103319_3p_a_at       | Hs.355816 | CTD (carboxy-terminal domain. RNA polymerase II. polypeptide A) small phosphatase 2            | CTDSP2       | 8.1  | 1.6 | 0.037 |
| Hs.291623.0.A1_3p_at   | Hs.291623 | hypothetical protein BC017488                                                                  | LOC124446    | 7.8  | 1.6 | 0.048 |
| g7657612_3p_at         | Hs.118725 | selenophosphate synthetase 2                                                                   | SEPHS2       | 12.6 | 1.5 | 0.048 |
| g5031600_3p_s_at       | Hs.433506 | actin related protein 2/3 complex. subunit 1B. 41kDa                                           | ARPC1B       | 10.3 | 1.5 | 0.049 |
| g306752_3p_x_at        | Hs.355394 | gamma-glutamyltransferase-like activity 4                                                      | GGTLA4       | 8.7  | 1.5 | 0.034 |
| g13528689_3p_a_at      | Hs.3989   | plexin B2                                                                                      | PLXNB2       | 9.5  | 1.5 | 0.018 |
| g6005781_3p_s_at       | Hs.251399 | histamine receptor H3                                                                          | HRH3         | 8.6  | 1.5 | 0.012 |
| Hs.293834.0.S1_3p_at   | Hs.436082 | hypothetical protein MGC24039                                                                  | MGC24039     | 5.6  | 1.5 | 0.028 |

|                        |           |                                                                                                |              |      |     |       |
|------------------------|-----------|------------------------------------------------------------------------------------------------|--------------|------|-----|-------|
| g1002922_3p_s_at       | Hs.415067 | coronin. actin binding protein. 1A                                                             | CORO1A       | 7.5  | 1.5 | 0.033 |
| 218596_3p_at           | Hs.3376   | TBC1 domain family. member 13                                                                  | TBC1D13      | 7.8  | 1.5 | 0.005 |
| Hs2.348672.2.S1_3p_at  | ---       | ---                                                                                            | ---          | 9.0  | 1.5 | 0.026 |
| Hs2.8728.2.A1_3p_a_at  | Hs.8728   | filamin-binding LIM protein-1                                                                  | FBLP-1       | 7.4  | 1.5 | 0.027 |
| g13259520_3p_at        | Hs.9028   | histone deacetylase 5                                                                          | HDAC5        | 6.7  | 1.5 | 0.042 |
| Hs.173864.0.S1_3p_x_at | Hs.173864 | Microtubule associated serine/threonine kinase 3                                               | MAST3        | 8.9  | 1.5 | 0.018 |
| g13112058_3p_s_at      | Hs.446438 | G protein-coupled receptor. family C. group 5. member C                                        | GPRC5C       | 9.0  | 1.5 | 0.041 |
| g10092596_3p_s_at      | Hs.417402 | muco lipin 1                                                                                   | MCOLN1       | 8.0  | 1.5 | 0.034 |
| g8922367_3p_a_at       | Hs.356096 | hypothetical protein FLJ10350                                                                  | FLJ10350     | 9.0  | 1.5 | 0.038 |
| g5174578_3p_at         | Hs.239663 | myeloid/lymphoid or mixed-lineage leukemia (trithorax homolog. Drosophila); translocated to. 7 | MLLT7        | 9.0  | 1.5 | 0.018 |
| g4502098_3p_at         | Hs.79172  | solute carrier family 25 (mitochondrial carrier; adenine nucleotide translocator). member 5    | SLC25A5      | 12.1 | 1.5 | 0.033 |
| Hs.61661.0.A1_3p_at    | Hs.403933 | F-box protein 32                                                                               | FBXO32       | 6.6  | 1.5 | 0.043 |
| g13375692_3p_at        | Hs.458374 | chondroitin polymerizing factor                                                                | CHPF         | 7.4  | 1.5 | 0.045 |
| Hs.86386.1.A2_3p_at    | ---       | ---                                                                                            | ---          | 5.5  | 1.5 | 0.030 |
| g11386146_3p_s_at      | Hs.406455 | prosaposin (variant Gaucher disease and variant metachromatic leukodystrophy)                  | PSAP         | 11.8 | 1.5 | 0.045 |
| g8922156_3p_x_at       | Hs.426359 | DKFZp564J157 protein                                                                           | DKFZp564J157 | 13.3 | 1.5 | 0.044 |
| Hs.6983.0.S1_3p_at     | Hs.467614 | transcriptional adaptor 2 (ADA2 homolog. yeast)-beta                                           | MGC21874     | 8.3  | 1.5 | 0.043 |
| Hs2.406933.1.S1_3p_at  | Hs.499548 | hypothetical protein MGC23284                                                                  | MGC23284     | 6.4  | 1.5 | 0.011 |
| Hs.17558.0.A1_3p_at    | Hs.17558  | hypothetical protein FLJ90586                                                                  | FLJ90586     | 7.7  | 1.5 | 0.015 |
| Hs2.50651.1.S2_3p_s_at | Hs.309244 | Janus kinase 1 (a protein tyrosine kinase)                                                     | JAK1         | 5.6  | 1.5 | 0.038 |
| 206540_3p_at           | Hs.181173 | galactosidase. beta 1-like                                                                     | GLB1L        | 7.3  | 1.5 | 0.032 |
| g4885524_3p_s_at       | Hs.439645 | SH2 domain containing 3A                                                                       | SH2D3A       | 6.5  | 1.5 | 0.045 |
| Hs.46319.1.S1_3p_a_at  | Hs.46319  | sex hormone-binding globulin                                                                   | SHBG         | 7.0  | 1.5 | 0.040 |
| Hs.189658.0.S1_3p_a_at | Hs.512608 | vacuolar protein sorting 24 (yeast)                                                            | VPS24        | 10.1 | 1.5 | 0.035 |
| g8922455_3p_s_at       | Hs.534537 | docking protein 4                                                                              | DOK4         | 6.5  | 1.5 | 0.025 |
| g7262293_3p_at         | Hs.88251  | arylsulfatase A                                                                                | ARSA         | 6.0  | 1.5 | 0.049 |
| 217117_3p_x_at         | ---       | ---                                                                                            | ---          | 8.8  | 1.4 | 0.015 |
| g4504768_3p_a_at       | Hs.85266  | integrin. beta 4                                                                               | ITGB4        | 8.7  | 1.4 | 0.044 |
| Hs.173864.0.S1_3p_at   | Hs.173864 | Microtubule associated serine/threonine kinase 3                                               | MAST3        | 8.6  | 1.4 | 0.028 |
| g12803668_3p_at        | Hs.269898 | SERTA domain containing 1                                                                      | SERTAD1      | 9.2  | 1.4 | 0.049 |

|                         |           |                                                                                                                                                                                                                     |                                                   |      |     |       |
|-------------------------|-----------|---------------------------------------------------------------------------------------------------------------------------------------------------------------------------------------------------------------------|---------------------------------------------------|------|-----|-------|
| Hs2.12764.1.S1_3p_at    | Hs.12764  | CDNA clone IMAGE:5541046. partial cds                                                                                                                                                                               | ---                                               | 9.1  | 1.4 | 0.025 |
| Hs2.287418.1.A1_3p_at   | Hs.34790  | F-box and leucine-rich repeat protein 18                                                                                                                                                                            | FBXL18                                            | 8.6  | 1.4 | 0.026 |
| g8922462_3p_a_at        | Hs.272838 | lipocalin-interacting membrane receptor                                                                                                                                                                             | LIMR                                              | 9.0  | 1.4 | 0.050 |
| Hs.36353.0.S1_3p_a_at   | Hs.301242 | likely ortholog of mouse myocytic induction/differentiation originator                                                                                                                                              | MIDORI                                            | 8.2  | 1.4 | 0.028 |
| Hs.178186.0.S1_3p_x_at  | ---       | ---                                                                                                                                                                                                                 | ---                                               | 7.9  | 1.4 | 0.041 |
| g12803230_3p_s_at       | Hs.194673 | phosphoprotein enriched in astrocytes 15                                                                                                                                                                            | PEA15                                             | 7.4  | 1.4 | 0.024 |
| Hs2.348672.2.S1_3p_x_at | ---       | ---                                                                                                                                                                                                                 | ---                                               | 9.2  | 1.4 | 0.029 |
| g12803692_3p_a_at       | Hs.181046 | dual specificity phosphatase 3 (vaccinia virus phosphatase VH1-related)                                                                                                                                             | DUSP3                                             | 6.7  | 1.4 | 0.040 |
| g306754_3p_s_at         | Hs.458453 | gamma-glutamyltransferase-like 4 /// gamma-glutamyltransferase 1 /// gamma-glutamyltransferase-like activity 4                                                                                                      | GGTL4 /// GGT1 /// GGTLA4                         | 9.5  | 1.4 | 0.049 |
| Hs.50925.0.A1_3p_at     | ---       | ---                                                                                                                                                                                                                 | ---                                               | 6.2  | 1.4 | 0.041 |
| Hs.302183.0.S1_3p_at    | ---       | ---                                                                                                                                                                                                                 | ---                                               | 5.4  | 1.4 | 0.045 |
| g13376545_3p_at         | Hs.287623 | hypothetical protein FLJ14100                                                                                                                                                                                       | FLJ14100                                          | 8.9  | 1.4 | 0.037 |
| g4507268_3p_at          | Hs.74597  | stromal interaction molecule 1                                                                                                                                                                                      | STIM1                                             | 8.2  | 1.4 | 0.039 |
| Hs2.8107.2.S1_3p_s_at   | Hs.8107   | guanine nucleotide binding protein (G protein). gamma 12                                                                                                                                                            | GNG12                                             | 5.1  | 1.4 | 0.039 |
| Hs.50716.1.S1_3p_a_at   | Hs.50716  | signal-regulatory protein beta 2                                                                                                                                                                                    | SIRPB2                                            | 8.2  | 1.4 | 0.049 |
| Hs.128095.0.A1_3p_at    | Hs.367799 | glutamate receptor. ionotropic. kainate 5                                                                                                                                                                           | GRIK5                                             | 11.1 | 1.4 | 0.025 |
| 1556533_3p_at           | Hs.211530 | hypothetical protein LOC283994                                                                                                                                                                                      | LOC283994                                         | 7.6  | 1.4 | 0.034 |
| g12408683_3p_s_at       | Hs.356358 | FCH domain only 2 /// chorionic somatomammotropin hormone-like 1 /// chorionic somatomammotropin hormone 1 (placental lactogen) /// growth hormone 1 /// growth hormone 2 /// chorionic somatomammotropin hormone 2 | FCHO2 /// CSHL1 /// CSH1 /// GH1 /// GH2 /// CSH2 | 4.0  | 1.4 | 0.048 |
| Hs.194293.0.A1_3p_at    | Hs.335599 | Hypothetical protein FLJ38348                                                                                                                                                                                       | FLJ38348                                          | 6.6  | 1.3 | 0.029 |
| Hs.173638.0.S1_3p_s_at  | Hs.214039 | transcription factor 7-like 2 (T-cell specific. HMG-box)                                                                                                                                                            | TCF7L2                                            | 7.7  | 1.3 | 0.040 |
| g13506660_3p_a_at       | Hs.214099 | brother of CDO                                                                                                                                                                                                      | BOC                                               | 6.7  | 1.3 | 0.018 |
| Hs.201201.0.A1_3p_at    | Hs.135229 | Similar to ataxin 2-binding protein 1 isoform 4; hexaribonucleotide binding protein 1                                                                                                                               | ---                                               | 7.9  | 1.3 | 0.029 |
| g11094314_3p_a_at       | Hs.233325 | hemochromatosis                                                                                                                                                                                                     | HFE                                               | 9.6  | 1.3 | 0.021 |

|                         |           |                                                                                            |          |     |     |       |
|-------------------------|-----------|--------------------------------------------------------------------------------------------|----------|-----|-----|-------|
| Hs.20707.1.S1_3p_at     | Hs.303669 | hypothetical protein MGC26694                                                              | MGC26694 | 8.7 | 1.3 | 0.045 |
| g11231178_3p_a_at       | Hs.407964 | leukocyte-associated Ig-like receptor 1                                                    | LAIR1    | 7.0 | 1.3 | 0.037 |
| Hs2.435302.1.S1_3p_at   | Hs.298119 | myeloid/lymphoid or mixed-lineage leukemia 3                                               | MLL3     | 9.9 | 1.3 | 0.039 |
| g4505140_3p_a_at        | Hs.79748  | solute carrier family 3 (activators of dibasic and neutral amino acid transport). member 2 | SLC3A2   | 9.6 | 1.3 | 0.049 |
| g11024695_3p_a_at       | Hs.283764 | F-box protein 24                                                                           | FBXO24   | 6.0 | 1.3 | 0.028 |
| Hs2.356664.3.S1_3p_a_at | Hs.534611 | homolog of Drosophila Numb-interacting protein                                             | NIP      | 7.1 | 1.3 | 0.047 |
| Hs2.370852.1.A1_3p_at   | Hs.370852 | Homo sapiens. clone IMAGE:5273088. mRNA                                                    | ---      | 8.4 | 1.3 | 0.044 |
| g4126973_3p_at          | Hs.428446 | carbonic anhydrase XI                                                                      | CA11     | 8.9 | 1.3 | 0.039 |
| Hs.301745.0.A1_3p_at    | ---       | ---                                                                                        | ---      | 5.2 | 1.3 | 0.033 |
| g6382065_3p_x_at        | Hs.446610 | amino-terminal enhancer of split                                                           | AES      | 8.5 | 1.3 | 0.033 |
