# Supplementary material
Source: PubMed Central journal article supplement (PMC1856251)
Supplement: gut_2005.073262_4.pdf [file gut_2005.073262_4.pdf]

### Large (60S) Subunit

|        |        |        |        |
|--------|--------|--------|--------|
| RPL3   | 0.7881 | RPL22  | 0.7905 |
| RPL3L  | -0.029 | RPL23  | 0.5934 |
| RPL4   | 1.1956 | RPL23A | 0.3506 |
| RPL5   | -0.011 | RPL24  | 0.5247 |
| RPL6   |        | RPL26  |        |
| RPL7   | 0.4218 | RPL27  | 0.553  |
| RPL7A  | 0.3839 | RPL27A | 0.6294 |
| RPL8   | 0.6048 | RPL28  | 0.7492 |
| RPL9   | 0.3425 | RPL29  | 0.4805 |
| RPL10  |        | RPL30  | 0.4523 |
| RPL10A | 1.4562 | RPL31  | 0.4635 |
| RPL11  | 0.5497 | RPL32  | 0.7939 |
| RPL12  | 0.6035 | RPL34  | 0.5987 |
| RPL13  | 0.483  | RPL35  | 1.1237 |
| RPL13A | 0.5944 | RPL35A | -0.112 |
| RPL14  | 0.6763 | RPL36  | 0.987  |
| RPL15  | 0.7026 | RPL37  | 0.4447 |
| RPL17  | 0.7517 | RPL37A | 0.4994 |
| RPL18  | 0.3406 | RPL38  | 0.5965 |
| RPL18A | 1.0524 | RPL39  | 0.7767 |
| RPL19  | 0.4485 | UBA52  | 0.2572 |
| RPL21  | 0.5102 | RPL41  | 0.1711 |
|        |        | RPL36A | 1.4735 |
| RPLP0  | 1.0036 |        |        |
| RPLP1  | 0.8381 |        |        |
| RPLP2  | 0.6903 |        |        |
| MRPL19 | 0.4568 |        |        |

### Small (40S) Subunit

|       |        |        |        |
|-------|--------|--------|--------|
| LAMR1 | 1.3032 | RPS15  | 0.5672 |
| RPS2  | 1.0905 | RPS15A | 0.475  |
| RPS3  | 0.7106 | RPS16  | 0.4276 |
| RPS3A | 0.6919 | RPS17  | 0.9441 |
| RPS4X | 0.6236 | RPS18  | 1.1197 |
| RPS4Y | 0.3027 | RPS19  | 0.8965 |
| RPS5  | 0.9744 | RPS20  | 0.6198 |
| RPS6  | 1.1212 | RPS21  | 0.9272 |
| RPS7  | 0.8835 | RPS23  | 0.5158 |
| RPS8  | 0.9723 | RPS24  | 1.2201 |
| RPS9  | -0.015 | RPS25  | 0.4863 |
| RPS10 | 0.6541 | RPS26  | 0.489  |
| RPS11 | 0.2498 | RPS27  | 0.1954 |
| RPS12 | 0.7743 | RPS27A | 0.2573 |
| RPS13 | 0.4519 | RPS28  | 0.5924 |
| RPS14 | 0.6301 | RPS29  | 0.4626 |
|       |        | FAU    | 0.3163 |

|         |        |
|---------|--------|
| RPS6KB1 | 0.311  |
| RPS6KB2 | -0.355 |
| RPS6KA1 | -0.167 |
| RPS6KA2 | 0.064  |
| RPS6KA3 | -0.395 |
| RPS6KA6 | 0.0048 |

### Legend

|                                                                                                                             |                 |
|-----------------------------------------------------------------------------------------------------------------------------|-----------------|
| <span style="background-color: #4CAF50; border: 1px solid black; display: inline-block; width: 15px; height: 10px;"></span> | villus, >2x     |
| <span style="background-color: #81C784; border: 1px solid black; display: inline-block; width: 15px; height: 10px;"></span> | villus          |
| <span style="background-color: #F44336; border: 1px solid black; display: inline-block; width: 15px; height: 10px;"></span> | crypt           |
| <span style="background-color: #D32F2F; border: 1px solid black; display: inline-block; width: 15px; height: 10px;"></span> | crypt, >2x      |
| <span style="background-color: #F5F5F5; border: 1px solid black; display: inline-block; width: 15px; height: 10px;"></span> | No criteria met |
| <span style="background-color: #FFFFFF; border: 1px solid black; display: inline-block; width: 15px; height: 10px;"></span> | Not found       |

Supplementary fig 1—expression of genes related to ribosomal proteins.

CARBOHYDRATE METABOLISM

|                 |                      |                  |                    |               |               |                |
|-----------------|----------------------|------------------|--------------------|---------------|---------------|----------------|
| A4GNT 1.5e6     | CBGL1                | GALGT -1.3e6     | HYAL2 -97445       | MGAT1 -7.6e6  | Q8NCI6 24322  | SIAT8E -1.6e6  |
| ABCC8 92280     | CHIA 53831           | GALK2            | HYAL3 -1.2e6       | MPI -58543    | Q8NFI3 8.0e6  | SLC2A2 -5.6e6  |
| ABO             | CHIT1 22816          | GALNAC-T3 -31707 | HYAL4 38141        | NAGA -5.7e5   | Q8NHT8        | SLC2A3 -9.8e6  |
| ABO             | CNOT7 -2.2e6         | GALNAC-T4        | IDH3A              | NAGLU -23212  | Q8TC30 83449  | SLC2A4 -53736  |
| ABO             | CTBS                 | GBA              | IDH3B 1.3e6        | NEU1 -6.8e6   | Q8TC58        | SLC2A5 -1.7e6  |
| ABO             | DHRS2 30853          | GBE1 -99637      | IDH3G -1.0e6       | NEU2          | Q8TDQ7 -1.2e6 | SLC2A8 -1.7e6  |
| ADRB3 766572    | DJ20N2.5             | GCKR 3657.3      | IMPA1 3.1e6        | NEU3 5294.8   | Q8W295 -7135  | SLC35A1 -4.7e6 |
| AGL 4.9e6       | DJ20N2.5             | GFPT1 87001      | INSR -1.1e6        | NEU4 -6.3e6   | Q96AB0 -58543 | SLC3A1         |
| AKR1B1 -3.2e6   | DKFZP434C1915 -86509 | GK -3.4e6        | KIAA0089 -6.0e6    | NTHL1 4.7e6   | Q96C11 26619  | SLC3A2 -3.2e6  |
| AKR7A2 -3.7e6   | DKFZP451A0519 -1.9e6 | GK2 69269        | KIAA1128 -1.1e6    | O76044        | Q96DB1 2.7e6  | SLC5A2         |
| ALDH1B1         | DKFZP566B1524 -32474 | GKP3             | KIAA1161           | O95210 -1.5e6 | Q96DR0 -3.8e6 | SMA3           |
| ALDH2 46787     | DKFZP762F216 -1.2e6  | GLA -3.1e6       | KIAA1434           | OGG1 -2.1e6   | Q96FF8 -6990  | SMA4           |
| ALDH3A1 118915  | DPM3 5.2e6           | GLB1 -8.4e6      | KLOTHO 1.9e6       | PGLS 2.3e6    | Q96M7 1.7e6   | SMA5 2.6e6     |
| AMY1A           | EPM2A 7325.3         | GLB1 -8.4e6      | KLOTHO             | PGM1 -1.6e6   | Q9BPZ4 -1.4e6 | SMPD1 1.5e6    |
| AMY2A -1.4e6    | EPM2A 7325.3         | GLO1 -1.5e5      | LCT -1.6e6         | PGM3 63738    | Q9BS14        | SMPDL3A -2.0e6 |
| AMY2B           | F-LAMBDA>8           | GMD5 245123      | LUCA1/HYAL1 -51079 | PGM5          | Q9BTY2 -3.9e6 | SMPDL3B -4.9e6 |
| B3GAT1 1.7e6    | FBP1 -1.1e6          | GNPDA1 -8.0e6    | LUCA-3             | PHKA2 3.6e6   | Q9BUP6 1.2e6  | SMPL_HUMAN     |
| B4GALT3 -1.4e6  | FBP2 6.7e6           | GPD1 -14904      | LYZ 1.3e6          | PHKG1         | Q9H227        | SPAM1 83449    |
| B4GALT4 -1.1e6  | FLJ00088             | GPI 63102        | MAN1A1             | PYGB -2.1e5   | Q9H8T2 -1.4e6 | TALDO1 2.7e6   |
| B4GALT5 -2.5e6  | FUCA1 -1.1e6         | GUSB -79879      | MAN1A2 -4.9e6      | PYGL -7.4e5   | Q9HC38 -3.8e6 | TDG            |
| B4GALT6 -7135   | FUT1 1.4e6           | H6PD 22638       | MAN1B1 97050       | PYGM 10931    | Q9P0X0 -2.8e6 | TFE1 -2.0e6    |
| BA395L14.5      | FUT2                 | HAS3 -4.2e6      | MAN1C1 -4.2e6      | Q13139        | Q9UK23 -4.7e6 | TREH -2.2e6    |
| BM32A 1.7e6     | FUT3 -1.3e5          | HEXA -2.5e6      | MAN2A1 -7.6e6      | Q16106        | Q9UKI5 -95037 | UNG 190414     |
| BPGM -5.9e6     | FUT4 3.4e6           | HEXB -4.8e6      | MAN2A2 -5.0e6      | Q8N2A7 83168  | Q9UM21 -4.9e6 | UNG2 2.7e6     |
| C1ORF22 -1.7e6  | FUT5 57343           | HGNT-IV-H ALT    | MAN2B1             | Q8N2K4 -95037 | Q9UQ53 -1.2e6 |                |
| C2/4GNT -7.6e6  | FUT9                 | HUM2DD -1.8e6    | MAN2B2 -1.9e6      | Q8N5D6 -95037 | Q9Y3E8        |                |
| C20ORF31 6889.3 | G6VTS68545 81,227    | HYAL1 -51079     | MAN2C1 92727       | Q8N5E6 83168  | RPE 27336     |                |
| C2GNT3 49697    | GAA -1.3e6           | HYAL1 -51079     | MANBA 5.0e6        | Q8N909        | SI -3.1e6     |                |
| CARKL 2.2e6     | GALC -1.1e6          | HYAL1 -51079     | ME1 83546          | Q8NAC2 -1.1e6 | SIAT8A -1.8e6 |                |
|                 | GALE -67354          | HYAL1 -51079     | MGAM -1.3e6        | Q8NC62 1.6e6  | SIAT8B 85417  |                |

FATTY ACID METABOLISM

|                       |                     |                             |                            |                                                |                            |                |
|-----------------------|---------------------|-----------------------------|----------------------------|------------------------------------------------|----------------------------|----------------|
| ABCD2 -53033          | FABP1 -2.9e6        | ARACHIDONIC ACID METABOLISM | ALOX15B -40237             | HAO1 -5431                                     | GGTLA1 -1.6e6              | ACO1 -88886    |
| ACAA1 -1.1e6          | FABP2               | CPLA2 BETA 6.3e6            | ALOX5 2.2e6                | HAO2                                           | LTA4H 3.5e6                | AKR1C3 28760   |
| ACAA2 -7.8e6          | FABP7 96217         | O75457 -1.3e5               | ALOX5AP -3.2e6             | ACADM -8.8e6                                   | LTC4S 73298                | CYP4F8 -1.9e6  |
| ACADL -1.2e6          | FACL1               | FATTY ACID BIOSYNTHESIS     | ALOXE3 2.0e6               | ACADS 68414                                    | MGST2 -3.2e6               | HPGD           |
| ACADM -8.8e6          | FACL2 -7.1e6        | ACACA                       | GGTLA1 -1.6e6              | ACADSVL -4.6e6                                 | PRG3 83010                 | PTGES 1.2e6    |
| ACADS 68414           | FACL3 -1.8e6        | ACACB -95052                | LT44H 3.5e6                | ACADVLL -4.6e6                                 | PROSTAGLANDIN BIOSYNTHESIS | Q8I1V14 -1.9e6 |
| ACADSB -6.6e6         | FACL4               | DKFZP547D048 211716         | LTC4S 73298                | ACOX1 -88886                                   | PTGDS 65534                | PTGDS 65534    |
| ACADVLL -6.6e6        | FACL5 -8.9e6        | ELOVL1 -4.5e6               | MGST2 -3.2e6               | ACOX2 -2.6e6                                   | PTGIS -33404               | PTGDS2 -2.6e6  |
| ACOX2 47495           | GNPAT 295152        | ELOVL2                      | PRG3 83010                 | ACOX3 47495                                    | PTGS1                      | PTGIS -33404   |
| ACOX3 47495           | HADHA -6.6e6        | ELOVL3 2.8e6                | PROSTAGLANDIN BIOSYNTHESIS | CPT1A -1.8e6                                   | PTGS2 -2.4e6               | PTGS1          |
| ADIPOR1 -8.1e6        | HADHB -3.5e6        | ELOVL4 -42178               | PTGDS 65534                | CPT1B 30503                                    | PTGS2 -2.4e6               | PTGS1          |
| ADIPOR2 -8.9e6        | HADHSC 4.3e6        | FASN                        | PTGDS2 -2.6e6              | CPT2                                           | TBXAS1 2.4e6               | PTGS2 -2.4e6   |
| ALOX12 -1.1e6         | HSD17B4 -2.8e5      | MLYCD 2.8e6                 | PTGIS -33404               | ECH1 4.6e6                                     | LEUKOTRIENE METABOLISM     | TBXAS1 2.4e6   |
| ALOX15B -40237        | IPLA2 -4.5e6        | NDUFAB1 3.4e6               | PTGS1                      | ECHS1 -95681                                   | PROSTAGLANDIN BIOSYNTHESIS |                |
| ASAH1 -5.2e5          | LIPE                | P60174                      | PTGS2 -2.4e6               | HADHB -3.5e6                                   | CYP4F2 -1.5e6              | CYP4F3 2.3e6   |
| CACH1 -27246          | LPL 1.4e6           | PRKAA1 3.4e6                | PTGS2 -2.4e6               | Q9UDG6                                         | LTB4DH -1.4e6              | PTGDS 65534    |
| CD36 -2.4e6           | O00324 4.3e6        | PRKAA2 -42278               | TBXAS1 2.4e6               | FATTY ACID CATABOLISM                          | PTGDS2 -2.6e6              | PTGIS -33404   |
| CPT1A -1.8e6          | PCCA 7.1e6          | PRKAB1 -29434               | PCCB 13610                 | POSITIVE REGULATION OF FATTY ACID BIOSYNTHESIS | PTGS1                      | PTGS2 -2.4e6   |
| CPT1B 30503           | PECI -2.8e6         | PRKAB2 -1.0e6               | Q9Y2B3 16406               | ICOSANOID METABOLISM                           | PTGS2 -2.4e6               | TBXAS1 2.4e6   |
| CPT2                  | PPARA               | PRKAG1 -2.8e6               | FATTY ACID DESATURATION    | CYP2J2 -1.2e5                                  | ALOX12 -1.1e6              |                |
| CROT                  | Q7Z4Z9              | PRKAG2 -3.8e6               | CYB5RP 1.5e6               | PLA2G4A 1.8e6                                  | ALOX12B 42206              |                |
| CRYL1                 | RETSRDR1            | PRKAG3 83462                | FADS2 -71428               | LEUKOTRIENE BIOSYNTHESIS                       | ALOX15 86613               |                |
| CYP4A11 1.5e6         | SC4MOL              | Q9BSN4 211716               | O15121 -1.2e6              | POSITIVE REGULATION OF FATTY ACID OXIDATION    | ALOX15B -40237             |                |
| DCI -2.3e6            | THEA 1.1e6          | Q9H7D1 211716               | FATTY ACID OXIDATION       | ALOX3 2.0e6                                    | ALOX5 2.2e6                |                |
| DKFZP761P18121 -4.5e6 | ACYL-COA METABOLISM | Q9NWU1 2.2e6                | MACS1 -5062                | GGTLA1 -1.6e6                                  | ALOX5AP -3.2e6             |                |
|                       | CES HBR3            | SCD -7.7e6                  | PERC                       | LTA4H 3.5e6                                    | ALOXE3 2.0e6               |                |
|                       | CRAT -4.4e6         | LEUKOTRIENE BIOSYNTHESIS    | Q86YN6                     | LTC4S 73298                                    | ALOX15B -40237             |                |
|                       | MLYCD 2.8e6         | ALOX12 -1.1e6               | Q8N1N9                     | MGST2 -3.2e6                                   | ALOX5 2.2e6                |                |
|                       | PTE1 -2.3e6         | ALOX12B 42206               | Q8TAL0                     | PRG3 83010                                     | ALOXE3 2.0e6               |                |
|                       | PTE2A -5.3e6        | ALOX15 86613                | FATTY ACID ALPHA-OXIDATION | PROSTAGLANDIN METABOLISM                       | ALOXE3 2.0e6               |                |

**Legend**  
  villus, >2x  
  villus  
  crypt  
  crypt, >2x  
  No criteria met  
  Not found

Supplementary fig 2—expression of metabolism related genes.

|                    |                     |                    |                |                                       |        |
|--------------------|---------------------|--------------------|----------------|---------------------------------------|--------|
| VESICULAR FRACTION |                     | CYP2J2 -1.16       | G6PC -0.133    | SPC21 0.0902                          | UGT2B7 |
| ALS2 -0.003        | CYP39A1 0.0084      | HMOX1 -1.987       | SPC22 0.3402   | UGT8 0.1128                           |        |
| STEAP 1.9972       | CYP3A3 -2.496       | HMOX2 -0.414       | SPC25 0.7673   |                                       |        |
| MICROSOME          |                     | CYP3A4 -2.496      | HSD11B1 0.0788 | SQLE 1.1843                           |        |
| AADAC -0.472       | CYP3A43 -0.1        | HSD11B2 -0.011     | SRD5A1 -0.559  | SRD5A2 0.0278                         |        |
| ALDH3A2 -0.037     | CYP3A5 -0.632       | HSD17B3 -0.342     | SSR3 -0.077    | STCH -0.104                           |        |
| APOB -1.672        | CYP3A7 -0.279       | KIAA1605 -0.389    | STS -0.056     | STX16 -0.05                           |        |
| ATP2A2 0.102       | CYP46A1 0.1446      | LTC4S 0.0733       | TAPBP -0.049   | TCL1A -0.12                           |        |
| COMT 0.417         | CYP4A11 0.1643      | MGST1 0.0348       | TMP21 0.0706   | UGT1A1                                |        |
| CYB5 -0.937        | CYP4B1 0.5423       | MGST2 -0.318       | UGT1A10        | UGT1A2                                |        |
| CYP17A1 0.0407     | CYP4F11 -1.103      | MGST3 0.0701       | UGT1A3         | UGT1A4                                |        |
| CYP19A1            | CYP4F12 -0.29       | MTP -0.742         | UGT1A5         | UGT1A6                                |        |
| CYP1A1 -1.503      | CYP4F2 -1.515       | O75452 -0.223      | UGT1A7         | UGT1A8                                |        |
| CYP1A2 -0.111      | CYP4F3 -2.284       | OAS2 -0.164        | UGT1A9         | UGT2A1 0.1226                         |        |
| CYP1B1 0.1075      | CYP4F8 -0.191       | OAS3 -0.104        | UGT2B10        | UGT2B11                               |        |
| CYP21A2            | CYP7A1 0.5002       | P78383 -0.719      | UGT2B15        | UGT2B17                               |        |
| CYP26A1 -0.043     | CYP7B1 0.0706       | PGRMC1 -0.808      | UGT2B28        | UGT2B4                                |        |
| CYP26A2 -0.024     | CYP8B1 -0.016       | PGRMC2 -0.888      | UGT2B28        |                                       |        |
| CYP2A13 -0.083     | DAD1 -0.744         | PIK3C2B -0.382     | UGT2B28        |                                       |        |
| CYP2A6 -0.019      | DKFZP762K054 -0.389 | Q86U73 0.1765      | UGT2B28        |                                       |        |
| CYP2A7             | DNAJC1 -0.434       | Q8WUD6 -0.363      | UGT2B28        |                                       |        |
| CYP2B6 -0.389      | DPEP1 -1.299        | Q9BPW9 -0.117      | UGT2B28        |                                       |        |
| CYP2C10 -1.921     | EPHX1 -0.029        | Q9Y2P9 -0.117      | UGT2B28        |                                       |        |
| CYP2C18 -1.062     | EPIM                | RDH -0.117         | UGT2B28        |                                       |        |
| CYP2C19 -0.113     | FMO1 0.0159         | RNP24 0.1082       | UGT2B28        |                                       |        |
| CYP2C8 -0.829      | FMO2 0.1765         | SEC63 0.1269       | UGT2B28        |                                       |        |
| CYP2C9 -1.921      | FMO3 -0.026         | SLC37A4 -0.612     | UGT2B28        |                                       |        |
| CYP2D6             | FMO4 -0.327         | SLC9A6 -0.544      | UGT2B28        |                                       |        |
| CYP2E1 0.0081      | FMO5 -0.679         | SPC12 -0.733       | UGT2B28        |                                       |        |
| CYP2F1 -0.02       | FMO6                | SPC18 0.0104       | UGT2B28        |                                       |        |
| VACUOLE            |                     | CTSZ -1.347        | LYSAL1 -0.188  | TMEM9 0.4852                          |        |
| DNPEP -0.474       | DNASE2 0.1185       | DPP7 -0.029        | M6PR 0.0122    | TOM1L1 -0.709                         |        |
| DNPEP -0.474       | DPP7 -0.029         | FUCA1 -1.143       | MAN2B1         | USP4                                  |        |
| Q9BTY6 -0.474      | GAA -0.128          | GALC -1.125        | MANBA 0.4985   | USP5 0.3923                           |        |
| Q9HAC6 -0.474      | GALNS               | GALB1 -0.836       | MPO -0.103     | USP6 0.168                            |        |
| Q9NV55 -0.474      | GBA                 | GLA -0.308         | NAGA -0.574    | VAMP4 -0.964                          |        |
| LYSOSOME           |                     | GGH 1.7115         | NAGLU -0.023   | LYSOSOMAL MEMBRANE                    |        |
| ABCB9 0.1923       | GLB1 -0.836         | GLB1 -0.836        | NEU1 -0.68     | ACP2 -1.07                            |        |
| ACP5 -0.225        | GM2A -0.206         | GNS -0.115         | NPC1 -0.794    | CD63 -0.891                           |        |
| ADR2 0.0235        | GUSB -0.08          | GUSB -0.08         | O43601 -0.505  | CORO1A -0.626                         |        |
| AGA 0.8048         | HEXA -0.251         | HEXA -0.251        | PCYOX1         | CTNS -0.02                            |        |
| AP3M1 0.0984       | HEXB -0.485         | HPS1 -0.237        | PPGB -1.036    | LAMP2 -2.128                          |        |
| ARSA -0.537        | HPS4 0.2951         | HYAL2 -0.097       | PPT1 0.0943    | SCARB2 -0.754                         |        |
| ARSB 0.0907        | IDUA -0.004         | IGF2R -0.821       | PPT2 0.1707    | TSC403 0.2814                         |        |
| ARSD               | IFI30               | LAMP1 -0.792       | PRCP 0.3285    | AZUROPHIL GRANULE                     |        |
| ASA1 -0.521        | IGF2R -0.821        | LAMP2 -2.128       | PRDX6 -0.391   | AZU1 -0.141                           |        |
| CD68 -0.085        | LAMP1 -0.792        | LAMP2 -2.128       | PRG3 0.083     | Q86SR2 -0.141                         |        |
| CLN2 -0.933        | LAPTM5 -1.175       | LGMN -1.196        | PSAP -0.578    | HSP70-DEPENDENT V-TYPE ATPASE COMPLEX |        |
| CLN3 -0.296        | LGMN -1.196         | LIPA -1.489        | Q8N7T4 -0.403  | ATP6V0A4 0.0699                       |        |
| CLN5 -0.965        | LIPA -1.489         | LIP2 0.0216        | Q9BWE2 -0.403  | ATP6V0D1 -0.31                        |        |
| CTBS               | LIP2 0.0216         | LUCA1/HYAL1 -0.051 | RAMP2 0.0596   |                                       |        |
| CTSB -1.185        | LIP2 0.0216         |                    | RAMP3 0.028    |                                       |        |
| CTSC 0.5313        | LIP2 0.0216         |                    | SFTPB 0.0645   |                                       |        |
| CTSD               | LIP2 0.0216         |                    | SGSH 0.1012    |                                       |        |
| CTSF 0.2113        | LIP2 0.0216         |                    | SLC30A4 0.0673 |                                       |        |
| CTSH -0.591        | LIP2 0.0216         |                    | SMPD1          |                                       |        |
| CTSK -0.207        | LIP2 0.0216         |                    | SMPD1 0.1469   |                                       |        |
| CTSL -1.328        | LIP2 0.0216         |                    | STS -0.056     |                                       |        |
| CTSL2 -0.115       | LIP2 0.0216         |                    | TIAL1          |                                       |        |
| CTSS -0.232        | LIP2 0.0216         |                    | TM4SF3 -0.617  |                                       |        |

**Legend**

- villus, >2x
- villus
- crypt
- crypt, >2x
- No criteria met
- Not found

Supplementary fig 3—expression of vesicle/transport related genes
